1 **The transcriptional landscape of Venezuelan equine encephalitis virus (TC-83) infection**

2

3 **Short title: Single-cell transcriptional dynamics of alphavirus infection**

4

5 Zhiyuan Yao<sup>1, ¶</sup>, Fabio Zanini<sup>2, 3, ¶, \*</sup>, Sathish Kumar<sup>1</sup>, Marwah Karim<sup>1</sup>, Sirle Saul<sup>1</sup>, Nishank

6 Bhalla<sup>4</sup>, Nuttada Panpradist<sup>1, 5</sup>, Avery Muniz<sup>1</sup>, Aarthi Narayanan<sup>4</sup>, Stephen R. Quake<sup>2, 6, 7</sup>, and

7 Shirit Einav<sup>1, 8, \*</sup>

8

9 <sup>1</sup>Division of Infectious Diseases and Geographic Medicine, Department of Medicine, Stanford  
10 University School of Medicine, Stanford, CA, USA

11 <sup>2</sup>Department of Bioengineering, Stanford University, Stanford, CA, USA

12 <sup>3</sup>Lowy Cancer Research Centre, University of New South Wales, Sydney, Australia

13 <sup>4</sup>National Center for Biodefence and Infectious Disease, Biomedical Research Laboratory,  
14 School of Systems Biology, George Mason University, Manassas, VA, USA.

15 <sup>5</sup>Department of Bioengineering, University of Washington, Seattle, WA, USA

16 <sup>6</sup>Chan Zuckerberg Biohub, San Francisco, CA, USA

17 <sup>7</sup>Department of Applied Physics, Stanford University, Stanford, CA, USA

18 <sup>8</sup>Department of Microbiology and Immunology, Stanford University School of Medicine,  
19 Stanford, CA

20

21

22 \* Corresponding authors: Shirit Einav (email: [seinav@stanford.edu](mailto:seinav@stanford.edu)) and Fabio Zanini  
23 ([fabio.zanini@unsw.edu.au](mailto:fabio.zanini@unsw.edu.au))

24

25 ¶: these authors contributed equally

26 **Abstract**

27 Venezuelan Equine Encephalitis Virus (VEEV) is a major biothreat agent that naturally causes  
28 outbreaks in humans and horses particularly in tropical areas of the western hemisphere, for  
29 which no antiviral therapy is currently available. The host response to VEEV and the cellular  
30 factors this alphavirus hijacks to support its effective replication or evade cellular immune  
31 responses are largely uncharacterized. We have previously demonstrated tremendous cell-to-cell  
32 heterogeneity in viral RNA (vRNA) and cellular transcript levels during flaviviral infection using  
33 a novel virus-inclusive single-cell RNA-Seq approach. Here, we used this unbiased, genome-  
34 wide approach to simultaneously profile the host transcriptome and vRNA in thousands of single  
35 cells during infection of human astrocytes with the live-attenuated vaccine strain of VEEV (TC-  
36 83). Host transcription was profoundly suppressed, yet “superproducer cells” with extremely  
37 high vRNA abundance emerged during the first viral life cycle and demonstrated an altered  
38 transcriptome relative to both uninfected cells and cells with high vRNA abundance harvested at  
39 later time points. Additionally, cells with increased structural-to-nonstructural transcript ratio  
40 exhibited upregulation of intracellular membrane trafficking genes at later time points. Loss- and  
41 gain-of-function experiments confirmed pro- and antiviral activities in both vaccine and virulent  
42 VEEV infections among the products of transcripts that positively or negatively correlated with  
43 vRNA abundance, respectively. Lastly, comparison with single cell transcriptomic data from  
44 other viruses highlighted common and unique pathways perturbed by infection across  
45 evolutionary scales. This study provides a high-resolution characterization of the VEEV (TC-  
46 83)-host interplay, identifies candidate targets for antivirals, and establishes a comparative  
47 single-cell approach to study the evolution of virus-host interactions.

48

49

## 50 **Author Summary**

51 Little is known about the host response to Venezuelan Equine Encephalitis Virus (VEEV) and  
52 the cellular factors this alphavirus hijacks to support effective replication or evade cellular  
53 immune responses. Monitoring dynamics of host and viral RNA (vRNA) during viral infection at  
54 a single-cell level can provide insight into the virus-host interplay at a high resolution. Here, a  
55 single-cell RNA sequencing technology that detects host and viral RNA was used to investigate  
56 the interactions between TC-83, the vaccine strain of VEEV, with the human host during the  
57 course of infection of U-87 MG cells (human astrocytoma). Virus abundance and host  
58 transcriptome were heterogeneous across cells from the same culture. Subsets of differentially  
59 expressed genes, positively or negatively correlating with vRNA abundance, were identified and  
60 subsequently *in vitro* validated as candidate proviral and antiviral factors, respectively, in TC-83  
61 and/or virulent VEEV infections. In the first replication cycle, “superproducer” cells exhibited  
62 rapid increase in vRNA abundance and unique gene expression patterns. At later time points,  
63 cells with increased structural-to-nonstructural transcript ratio demonstrated upregulation of  
64 intracellular membrane trafficking genes. Lastly, comparing the VEEV dataset with published  
65 datasets on other RNA viruses revealed unique and overlapping responses across viral clades.  
66 Overall, this study improves the understanding of VEEV-host interactions, reveals candidate  
67 targets for antiviral approaches, and establishes a comparative single-cell approach to study the  
68 evolution of virus-host interactions.

69

70

71

72

## 73 **Introduction**

74 For more than a century, Venezuelan Equine Encephalitis Virus (VEEV), a member of the  
75 *Alphavirus* genus, has been the causative agent of outbreaks of febrile neurological disease in  
76 both animals and humans in Central and South America (1,2). The incidence of VEEV infection  
77 is underestimated since early symptoms are non-specific (2). While typically transmitted via a  
78 mosquito bite, VEEV is also infectious as an aerosol, hence it is considered a major bioterrorism  
79 threat (3). To date, no US FDA approved drugs or vaccines against VEEV are available. A  
80 deeper understanding of VEEV biology in human cells is required to advance the development of  
81 effective countermeasures against VEEV.

82  
83 Because VEEV is a biosafety level 3 pathogen, TC-83, a live-attenuated vaccine strain, is  
84 commonly used for research purposes (4). Although attenuated, VEEV TC-83 replicates rapidly:  
85 viral protein production is observed as early as 6 hours postinfection (hpi) in human astrocytoma  
86 cells (U-87 MG) at multiplicity of infection (MOI) of 2, and over  $10^{10}$  copies of intracellular  
87 viral RNA (vRNA) can be detected by 24 hpi (5). It remains unknown, however, whether a large  
88 number of cells, each producing a small number of virions, or a few “superproducer” cells drive  
89 this effective virus production. Productive replication is associated with profound shutdown of  
90 host gene transcription (6). Nevertheless, since the virus relies on cellular machineries, it is  
91 important to identify which host factors are “spared” from this shutdown, as they may represent  
92 essential factors for effective viral replication.

93  
94 The genome of VEEV is an ~11.5 kb single-stranded positive-sense RNA. The genomic RNA  
95 contains two regions. The 5' two-thirds of the genome constitutes the first open reading frame  
96 (ORF), which encodes the nonstructural (ns) proteins required for viral RNA synthesis (nsP1-4).

97 The 3' one-third of the genome encodes the structural proteins. The structural proteins (capsid,  
98 envelope glycoproteins E1-3, 6k, and transframe (TF) protein) are translated from a second ORF  
99 that is expressed through the production of a subgenomic mRNA from an internal promoter in  
100 the negative-strand RNA replication intermediate and function in the assembly of new virions  
101 and their attachment and entry into cells (7). While the stoichiometry of the genomic and  
102 subgenomic transcripts in the setting of VEEV infection has not been characterized, the  
103 transcription of the subgenomic RNA of a related alphavirus, Sindbis virus (SINV), was shown  
104 to be ~3-fold higher than the genomic RNA during late stages of the viral lifecycle (8,9),  
105 supporting a switch towards increased synthesis of structural proteins required for virion  
106 formation over nonstructural proteins required primarily for viral RNA replication (10,11).

107

108 The understanding of the alphavirus life cycle is largely based on studies conducted with the  
109 non-pathogenic SINV and Semliki forest virus (SFV). Alphaviruses enter their target cells via  
110 clathrin-mediated endocytosis and release their nucleocapsid into the cytoplasm via fusion with  
111 endosomal membranes, followed by translation and processing of the nonstructural polyprotein  
112 (12). Viral RNA replication occurs within membrane invaginations called spherules that are  
113 thought to be derived from the plasma membrane, endoplasmic reticulum and late endosomes  
114 and are subsequently incorporated into type 1 cytopathic vacuoles (CPV)-I composed of  
115 modified endosomes and lysosomes (13–16). Production of genomic RNA and subsequently  
116 subgenomic RNA are followed by polyprotein translation and processing. The current model of  
117 infectious alphavirus production suggests that the genomic RNA is packaged by the capsid in the  
118 cytoplasm, and that the viral glycoproteins traffic via membrane structures, presumed to be  
119 *trans*Golgi-derived (CPV-II), to budding sites on the plasma membrane, followed by membrane  
120 curving and scission, facilitating envelopment of the nucleocapsid (16–18).

121

122 Although VEEV is predicted to extensively interact with cellular factors to effectively replicate  
123 and evade cellular immune responses, like other small RNA viruses, little is known about these  
124 interactions. A recent small interfering RNA (siRNA) screen revealed a requirement for actin-  
125 remodeling pathway proteins including ARF1, RAC1, PIP5K1- $\alpha$ , and ARP3 in VEEV infection  
126 and specifically in promoting viral glycoprotein transport to the plasma membrane (19). Various  
127 other cellular proteins, such as DDX-1 and -3 (20), have been reported to interact with viral  
128 proteins and have proviral functions. The transcript levels of antiviral factors including IFITM3  
129 (21) and members of the PARP protein family (22) were shown to be upregulated in VEEV  
130 infection via genome-wide microarray screenings. Nevertheless, to the best of our knowledge,  
131 the interplay between VEEV and the human host has not been studied to date via an unbiased,  
132 single cell genome-wide approach.

133

134 Single cell RNA sequencing (scRNA-Seq) has demonstrated utility for understanding the  
135 heterogeneity of both viral and cellular transcriptome dynamics at a high resolution. We have  
136 recently developed virus-inclusive single-cell RNA-Seq (viscRNA-Seq), an approach to  
137 simultaneously profile host and viral gene expression in thousands of single cells (23). The  
138 studies we and others have conducted in cell lines infected with dengue (DENV), Zika (ZIKV),  
139 influenza A (IAV) (24,25) and West Nile (WNV) viruses (26) and our results in samples from  
140 DENV-infected patients (27) revealed a tremendous cell-to-cell heterogeneity in both vRNA  
141 abundance and levels of host factors that support or restrict infection. Moreover, we have  
142 demonstrated the utility of this approach in identifying novel cellular factors that support or  
143 restrict viral infection (23). We have therefore hypothesized that studying VEEV-TC-83  
144 transcriptome dynamics at a single cell resolution may overcome challenges related to the high  
145 viral replication rate, thereby highlighting specific transcriptomic signatures above the

146 suppressed transcriptional landscape and identifying candidate cellular factors that may support  
147 or restrict VEEV replication.

148

149 We conducted a longitudinal study of virus-host cell interactions across 24 hours of VEEV-TC-  
150 83 infection in U-87 MG cells via viscrRNA-Seq. We detected extreme heterogeneity in vRNA  
151 abundance and host transcriptome across cells from the same culture. To overcome the challenge  
152 presented by this uneven and rapid viral replication, we stratified cell populations based on  
153 vRNA abundance rather than time postinfection and correlated cellular gene expression with  
154 both (i) total vRNA and (ii) the ratio of total (genomic + subgenomic) to genomic vRNA. These  
155 approaches enabled identification of genes whose expression is altered during VEEV-TC-83  
156 infection, several of which were then confirmed via loss-of-function and gain-of-function  
157 experiments in cells infected with the vaccine or virulent VEEV strains as candidate pro- and  
158 antiviral factors, respectively. Moreover, we revealed a small population of “superproducer  
159 cells” that drives the rapid increase in vRNA in the first replication cycle and a cell population  
160 that harbors excess of the structural over nonstructural viral ORFs at late stages of viral infection,  
161 both associated with distinct host gene expression patterns. Lastly, comparison of the VEEV  
162 dataset with published data on other RNA viruses revealed unique and overlapping host gene  
163 responses across viral clades, highlighting the utility of comparative single-cell transcriptomics.

164

## 165 **Materials and methods**

### 166 **Cells**

167 U-87 MG, BHK-21 (baby hamster kidney) and Vero (African green monkey kidney epithelial)  
168 cell lines were obtained from ATCC (Manassas, VA). Cells were grown in Dulbecco’s Modified  
169 Eagle’s medium (DMEM, Mediatech, Manassas, VA), supplemented with 1% Penicillin-  
170 Streptomycin solution, 1% L-glutamine 200 mM (Thermo Fisher Scientific, Waltham, MA) and

171 10% Fetal Bovine Serum (FBS, Omega Scientific, INC, Tarzana, CA). Cells were maintained in  
172 a humidified incubator with 5% CO<sub>2</sub> at 37 °C. Cells were tested negative for mycoplasma by the  
173 MycoAlert mycoplasma detection kit (Lonza, Morristown, NJ).

174

### 175 **Plasmids and virus constructs**

176 The plasmids encoding infectious VEEV-TC-83 with a GFP reporter (VEEV-TC-83-Cap-eGFP-  
177 Tav, hereafter VEEV-TC-83-GFP) or a nanoluciferase reporter (VEEV TC-83-Cap-nLuc-Tav,  
178 hereafter VEEV-TC-83-nLuc) were a gift from Dr. William B. Klimstra (Department of  
179 Immunology, University of Pittsburgh) (28). Open reading frames (ORFs) encoding 11 hits were  
180 selected from the Human ORFeome library of cDNA clones (Open Biosystems) (29) and  
181 recombined into a FLAG (for FLAG tagging) vector using Gateway technology (Invitrogen).

182

### 183 **Virus production**

184 Viral RNA (vRNA) (VEEV-TC-83-GFP or nLuc) was transcribed *in vitro* from cDNA plasmid  
185 templates linearized with MluI via MegaScript Sp6 kit (Invitrogen #AM1330) and electroporated  
186 into BHK-21 cells. VEEV was harvested from the supernatant 24 hours postelectroporation,  
187 clarified from cell debris by centrifugation, and stored at -80 °C. The non-reporter, wild type  
188 VEEV-TC-83, live attenuated strain, and the wild type Trinidad Donkey (TrD) strain were  
189 obtained from BEI Resources. All VEEV-TrD experiments were performed under BSL3  
190 conditions. Virus stock titers were determined by standard plaque assay on Vero cells, and titers  
191 were expressed as plaque forming units/ml (PFU/ml).

192

### 193 **Infection assays**

194 U-87 MG cells were infected with VEEV-TC-83-GFP at various MOIs (0, 0.1, and 1) and  
195 harvested at distinct time points postinfection. For the functional screens, U-87 MG cells were



196 infected with either VEEV-TC-83-nLuc in 8 replicates (MOI = 0.01), non-reporter VEEV-TC-  
197 83, or wild type VEEV TrD in triplicates (MOI = 0.001). Overall infection was measured at 18  
198 hpi via a nanoluciferase assay using a luciferin solution obtained from the hydrolysis of its O-  
199 acetylated precursor, hikarazine-103 (prepared by Dr. Yves Janin, Pasteur Institute, France) as a  
200 substrate (30,31) or at 24 hpi via standard plaque assays (viral titers in the control samples in  
201 these experiments were  $> 10^8$  PFU/ml).

202

### 203 **Detection of infected cells using VEEV-specific capture oligo**

204 To optimize the viscRNA-Seq protocol for a wide dynamic range of vRNA amount per VEEV-  
205 infected cells, we designed and screened eight capture oligonucleotides (**S1 Table**).

206 To screen these capture oligos, we first generated cDNA from VEEV-infected cells in the  
207 presence of each or combinations of VEEV-specific capture oligo. Specifically, 30 pg of both  
208 vRNA and cellular RNA purified from VEEV-infected cells was reverse-transcribed to cDNA in  
209 a reaction containing SuperScript™ IV reverse transcriptase, 1X First Strand buffer (Invitrogen),  
210 5 mM DTT, 1 M betaine, 6 mM MgCl<sub>2</sub>, 1 μM oligo dT and each or combinations of 100 nM  
211 reverse VEEV capture oligo. Subsequently, cDNA underwent 21-cycle PCR amplification using  
212 ISPCR primers. cDNA was then purified using Ampure XP beads (Beckman Coulter) at the ratio  
213 of 0.8 and eluted in 15 μL EB buffer. Fragments of purified, concentrated cDNA were visualized  
214 and quantified using bioanalyzer (DNA High Sensitivity kit, Agilent Technologies). To quantify  
215 the amount of vRNA captured by each or combinations of capture oligos, these purified cDNA  
216 were also subjected to qPCR (Hot-start OneTaq (New England Biolabs), 1x Standard Taq buffer,  
217 1x Evagreen (Biotium), forward primer: ATTCTAAGCACAAGTATCATTGTAT and reverse  
218 primer: TTAGTTGCATACTTATAACAATCTGT located upstream of all the capture oligos.

219 VEEV\_1 and VEEV\_2 yielded the highest copies of viral cDNA and did not generate significant

220 primer dimers. Therefore, this combination of the capture oligo was selected for downstream  
221 experiments.

222

### 223 **Single cell sorting**

224 At each time point, cells were trypsinized for 10 min, spun and resuspended in 1 mL fresh media.  
225 Within 15 min, cells were pelleted again and resuspended in 2 ml 1X phosphate-buffered saline  
226 (PBS) buffer at a concentration of  $10^6$  cells/ml. Cells were filtered through a 40  $\mu$ m filter into a 5  
227 ml FACS tube and sorted on a Sony SH800 sorter using SYTOX™ Blue dead cell stain  
228 (ThermoFisher) to distinguish living cells from dead cells and debris. VEEV harboring cells  
229 were sorted based on GFP signal. Cells were sorted into 384-well PCR plates containing 0.5  $\mu$ l  
230 of lysis buffer using ‘Single cell’ purity mode. A total of 12 384-well plates of single cells were  
231 sorted for the VEEV time course.

232

### 233 **Lysis buffer, reverse transcription, and PCR**

234 To capture and amplify both mRNA and vRNA from the same cell, the Smart-seq2 protocol was  
235 adapted (Picelli et al., 2014). All volumes were reduced by a factor of 12 compared to the  
236 original protocol to enable high-throughput processing of 384-well plates. External RNA  
237 Controls Consortium (ERCC) spike-in RNA was added at a concentration of 1:10 of the normal  
238 amount. The lysis buffer contained 100nM of oligo-dT primer, 100 mM of virus specific capture  
239 oligo mix (i.e. VEEV\_1 and VEEV\_2) to capture the positive-stranded virus RNA.

240

241 Other virus-specific primers and higher primer concentrations were tested but resulted in a large  
242 fraction of primer dimers. In order to reduce interference between the virus-specific primer and  
243 the Template Switching Oligo (TSO) used to extend the reverse transcription (RT) products, a  
244 5'-blocked biotinylated TSO was used at the standard concentration. RT and PCR of the cDNA

245 were performed in a total volume of 1  $\mu$ l and 2.5  $\mu$ l for each well respectively. The resulting  
246 cDNAs were amplified for 21 cycles. Lambda exonuclease was added to the PCR buffer at a  
247 final concentration of 0.0225 U/ $\mu$ l and the RT products were incubated at 37 °C for 30 min  
248 before melting the RNA-DNA hybrid (as it was observed that this reduced the amount of low-  
249 molecular weight bands from the PCR products). The cDNA was then diluted 1 to 7 in EB buffer  
250 for a final volume of 17.5  $\mu$ l. All pipetting steps were performed using a Mosquito HTS robotic  
251 platform (TTP Labtech).

252

### 253 **cDNA quantification**

254 To quantify the amount of cDNA in each well after PCR, a commercial fluorometric assay was  
255 used (ThermoFisher Quant-It™ Picogreen). Briefly, 1  $\mu$ l of cDNA and 50  $\mu$ l of 1:200 dye-buffer  
256 mix were pipetted together into a flat-bottom 384-well plate (Corning 3711). For each plate, six  
257 wells were used as standard wells. 1  $\mu$ l dd H<sub>2</sub>O was added into one standard well as blank. The  
258 standard solutions were diluted into 5 concentrations (0.1, 0.2, 0.4, 0.8, 1.6 ng/ $\mu$ l) and added 1 $\mu$ l  
259 into the remaining 5 standard wells. The plate was vortexed for 2 min, centrifuged, incubated in  
260 the dark for 5 min, and measured on a plate reader at wavelength 550 nm. cDNA concentrations  
261 were calculated via an affine fit to the standard wells.

262

### 263 **Library preparation and sequencing**

264 For each time point, one plate was sent for library preparation and sequencing. In total, 6 plates  
265 (2304 cells) were prepared. Sequencing libraries were prepared using the illumina Nextera XT  
266 kit according to the manufacturer's instructions, with the following exceptions: (1) we used a  
267 smaller reaction volume (around 1  $\mu$ l per cell); (2) we chose a slightly higher cDNA  
268 concentration (0.4 ng/ $\mu$ l) as input, to compensate for the lack of bead purification upstream; (3)  
269 we used the commercial 24 i7 barcodes and the 64 new i5 barcode sequences. We noticed a low

270 level of cross-talk between these barcodes, indicated by up to five virus reads found in a few  
271 uninfected cells. However, considering that a sizeable fraction of cells in the same sequencing  
272 run (late infected and high MOI) had thousands of virus reads, the amount of cross-talk between  
273 barcodes appears to be of the order of 1 in 10,000 or less. We used Illumina Novaseq sequencer  
274 for sequencing.

275

## 276 **Bioinformatics pipeline**

277 Sequencing reads were mapped against the human GRCh38 genome with supplementary ERCC  
278 sequences and TC-83-VEEV-GFP genome using STAR Aligner (32) . Genes were counted using  
279 htseq-count (33). The Stanford high performance computing cluster Sherlock 2.0 was used for  
280 the computations. Once the gene/virus counts were available, the downstream analysis was  
281 performed on laptops using the packages Seurat (34) and singlet  
282 (<https://github.com/iosonofabio/singlet>), as well as custom R and Python scripts. Ggplot2  
283 (35), matplotlib (36) and seaborn (37) were used for plotting.

284

285 For the mutational analysis, all reads mapping to VEEV were extracted from all cells with a  
286 unique identifier of the cell of origin, and all four possible alleles at each nucleotide were  
287 counted by custom scripts based on pysam (<https://github.com/pysam-developers/pysam>) and  
288 wrapped in an xarray Dataset (38). The analysis was restricted to infected cells with an average  
289 of 100 or more reads per viral genomic site to reduce shot noise.

290

291 Comparison with flaviviruses was performed as follows. First, host genes with similar expression  
292 (within a factor of 10) in counts per millions (cpm) were identified. Within that class,  
293 correlations with vRNA for VEEV, DENV, ZIKV were computed separately. Host factors with  
294 the highest discrepancies between pairs of viruses were identified. For Figs 5A-C, a gene was

295 chosen from the most discrepant genes exemplifying the different behaviors observed and the  
296 cells were scattered using vRNA abundance and gene expression axes, and colored by virus. For  
297 Fig 5D, the host counts for each gene from all three experiments (in cpm) were added and  
298 fractions belonging to each experiment were computed. Because the sum is constrained to be  
299 100%, ternary plots could be used for plotting the three different fractions in two dimensions.  
300 For figs 5E-F, for each gene shown we computed its percentile in correlation with DENV and  
301 ZIKV vRNA, i.e. the percentage of other host genes with a correlation less than this focal gene.  
302 This transformation emphasizes the top correlates/anticorrelates against batch effects and  
303 different multiplicities of infection in the DENV and ZIKV experiments. For figs 5G-I,  
304 published tables of counts and metadata were downloaded from links present in each publication,  
305 normalized to counts per millions, and filtered for low-quality cells. We computed the  
306 correlation of host gene expression and vRNA in each experiment, then features with a high rank  
307 in at least one virus were selected and correlation coefficients were centered and normalized  
308 between -1 and 1 for each virus to enable meaningful cross-experiment comparison. Principal  
309 Component Analysis (PCA), Uniform Manifold Approximation and Projection (UMAP),  
310 similarity graphs, and Leiden clustering (39) were computed and plotted.

311

### 312 **Cell selection and normalization**

313 The criteria to select cells were as follows: total reads > 300,000, gene counts > 500 and a ratio  
314 of ERCC spike-in RNA to total reads ratio < 0.05. Based on these criteria, 2004 out of 2301 cells  
315 were selected for downstream analysis. Due to the high viral copies of VEEV in cells infected  
316 for 12 and 24 hrs (more than 10%), traditional normalization (dividing by total reads) caused a  
317 bias which underestimated the expression of host genes. To avoid this, we normalized gene  
318 counts to ERCC total reads, since these are not affected by the virus. Each gene count column  
319 (including virus reads) was thus divided by ERCC total reads and then log transformed.

320

### 321 **Data and code availability**

322 The single cell RNA-Seq data for this study is available on GEO at submission number:

323 GSE145815 (<https://www.ncbi.nlm.nih.gov/geo/query/acc.cgi?acc=GSE145815>). The code used

324 in the computational analyses can be found at [https://github.com/saberyzy/VEEV-single\\_cell](https://github.com/saberyzy/VEEV-single_cell).

325 Processed count and metadata tables are also available on FigShare at

326 [https://figshare.com/articles/Untitled\\_Item/11874198](https://figshare.com/articles/Untitled_Item/11874198).

327

### 328 **Loss-of-function assays**

329 siRNAs (1 pmol) were transfected into cells using Lipofectamine RNAiMAX transfection

330 reagent (Invitrogen) 72-96 hours prior to infection with VEEV-TC-83-nLuc, non-reporter

331 VEEV-TC-83, or wild type VEEV-TrD. Custom Cherry-Pick ON-TARGET plus siRNA library

332 against 11 genes was purchased from Dharmacon (see Supplementary Table 2 for gene and

333 siRNA sequence details).

334

### 335 **Gain-of-function assays**

336 Individual plasmids encoding 11 human genes or empty control vector were transfected

337 individually into U-87 MG cells with Lipofectamine 3000 (Invitrogen) 48 hours prior to

338 infection with VEEV-TC-83-nLuc.

339

### 340 **Viability assays**

341 Viability was measured using alamarBlue reagent (Invitrogen) according to the manufacturer's

342 protocol. Fluorescence was detected at 560 nm on an Infinite M1000 plate reader (Tecan).

343

### 344 **RNA extraction and qRT-PCR**

345 Total RNA was isolated from cells using RNeasy Mini Kit (Qiagen). For host genes, reverse  
346 transcription mixtures contained 1 µg or 10 µl RNA and High-Capacity RNA-to-cDNA reverse  
347 transcription kit (Applied Biosystems). qRT-PCR mixtures were assembled using 50 ng or 5 µl  
348 cDNA and PowerUp SYBR Green Master Mix (Applied Biosystems). For VEEV detection,  
349 qRT-PCR mixtures were assembled using 50 ng or 5 µl total RNA and QuantiTect Probe RT-  
350 PCR Kit (Qiagen). Amplification and analysis were performed using QuantStudio3 system  
351 (ThermoFisher Scientific). Primer sequences are listed in Table S3.

352

### 353 **Western blot analysis**

354 Cells were lysed in M-PER Mammalian Protein Extraction Reagent (Thermo Fisher Scientific).  
355 Protein lysates were run on 4%–12% Bis-Tris gels (Invitrogen), transferred onto PVDF  
356 membranes (Bio-Rad). Blots were blocked and blotted with anti-FLAGtag (Sigma-Aldrich,  
357 catalog F1804) antibody. Signal was detected using anti-mouse HRP-conjugated secondary  
358 antibody (Cell Signaling Technology, catalog 7076).

359

### 360 **Statistics**

361 All statistical analysis were performed with GraphPad Prism software. *P* values or *q* values were  
362 calculated by 1-way ANOVA with either Dunnett's or false discovery rate (FDR) corrected  
363 multiple comparisons tests, respectively, as specified in each figure legend.

364

### 365 **Results**

#### 366 **ViscRNA-Seq reveals cell-to-cell heterogeneity in VEEV-TC-83 and host gene expression.**

367 To characterize the relation between viral and host cell transcriptional dynamics over the course  
368 of VEEV infection, human astrocytoma cells (U-87 MG) (40) were infected with VEEV-TC-83

369 (attenuated vaccine strain) capsid fusion reporter virus expressing GFP (28) at MOIs of 0.1 and 1  
370 or mock infected, and harvested at six time points: 0.5, 1.5, 4, 6, 12, and 24 hpi (**Fig 1A**). Single  
371 cells were then isolated and processed by viscRNA-Seq, as described previously (23). Since the  
372 VEEV RNA is polyadenylated, it can be captured by the standard poly-T oligonucleotide that  
373 hybridizes with host transcripts. Nevertheless, to improve vRNA capture and ensure coverage at  
374 the 5' end of the viral genome, two specific viral capture oligonucleotides, at positions 352 and  
375 1,742 of the VEEV genome, were added to the reaction (see Methods). In total, 4608 cells were  
376 processed, of which 2301 cells were sequenced with approximately 1 million reads/cell (**S1A**  
377 **Fig**). 2004 cells passed quality controls and were analyzed (see Methods).

378  
379 To identify a proper cutoff for defining infected cells, we analyzed both GFP signal and vRNA  
380 reads. During cell sorting (the first step of viscRNA-Seq) the GFP signal was recorded using the  
381 fluorescein isothiocyanate (FITC) gate, enabling measurement of cellular GFP expression levels.  
382 The GFP signal was comparable in cells harboring 1 to 1000 viral reads, yet it sharply increased  
383 in cells harboring over 1000 viral reads (**Fig 1B**). The lower sensitivity of GFP signal relative to  
384 viral reads is likely due to the lag of protein expression after RNA synthesis and indicates that  
385 virus reads can be used as an effective indicator for VEEV infection. Next, we sought to define a  
386 cutoff to distinguish infected from bystander cells (uninfected but derived from the sample that  
387 was exposed to the virus). We set multiple cutoffs between 1 and 100 viral reads, selected only  
388 cells with viral read number greater than these cutoffs, and calculated the correlation coefficient  
389 between GFP expression and viral reads (**S1B Fig**). The correlation between GFP expression and  
390 viral reads first increased with the cutoffs and then stabilized once the cutoff reached 10 viral  
391 reads, with correlation coefficients greater than 0.8 via both Spearman's and Pearson  
392 correlations. We therefore defined the presence of 10 or more viral reads as the cutoff to  
393 distinguish VEEV-infected from bystander cells. Similar findings were observed upon plotting



394 the relationship between GFP expression and virus/total reads ratio (vs. raw viral reads) (**S1C**  
395 **Fig**), indicating that the selected threshold of 10 viral reads (or 0.00001 virus/total reads) is not  
396 affected by differences in sequencing depth between cells.

397

398 The fraction of VEEV-infected cells increased with both time and MOI and saturated at 12 and  
399 24 hpi with MOI 1 and 0.1, respectively (**Fig 1C**). The infection status in these cells at the  
400 various time points postinfection was confirmed via qRT-PCR (**S1D Fig**). A rapid increase in the  
401 ratio of both viral/total reads and GFP expression was observed within single cells over time (**Fig**  
402 **1D**). Notably, the distributions of virus/total reads and GFP expression were particularly wide at  
403 12 hpi when analyzing either the entire infected cell population or infected cells separated by the  
404 two MOIs (**S1E and S1F Figs**). At 24 hpi, the observed increase in vRNA reads was associated  
405 with a decline in cellular transcripts. The normalized cellular mRNA reads (calculated by  
406 dividing the absolute number of reads by the sum of External RNA Controls Consortium  
407 (ERCC) spike-in reads) declined in the infected cell group at 24 hpi relative to the corresponding  
408 uninfected cell group and the same infected cell group at 12 hpi (**Fig 1E**). To avoid an artificial  
409 decline in host gene reads in cells with high vRNA abundance, rather than normalizing cellular  
410 gene reads by the total reads, we normalized by ERCC reads for most downstream analyses. This  
411 transformation is akin to an estimate of the actual number of mRNA molecules for each gene (up  
412 to a constant factor).

413

#### 414 **Altered expression of cellular factors and pathways during VEEV infection.**

415 The wide distributions of virus/total reads observed at 12 hpi suggested that to more precisely  
416 characterize the phenotype of cells from VEEV-infected samples, cells should be divided based  
417 on the virus/total read content rather than time postinfection or MOI. To identify host genes  
418 whose expression is altered during VEEV infection, we integrated differential gene expression

419 and correlation analyses. First, we combined cells harvested at different time points. Since the  
420 GFP signal started to increase significantly with a virus/total read ratio greater than 0.001 (**S1C**  
421 **Fig**), we divided cells into the following three groups based on this cutoff: infected cells with  
422 high vRNA (virus/total reads > 0.001), infected cells with low vRNA (virus/total reads < 0.001),  
423 and uninfected controls (**S2A Fig**). Since GFP expression and viral reads correlated well in the  
424 high vRNA group, we focused on differences between the high vRNA cell group and the  
425 uninfected group. Computing differential expression at the distribution level (Mann-Whitney U  
426 test) revealed 1734 host genes, whose expression level significantly differed between the high  
427 vRNA group and the uninfected group. To test the robustness of the population division, we  
428 applied a set of cutoffs (ranging from 0.0001 virus/total reads to 0.01 virus/total reads) and  
429 computed differential expression between the high vRNA group and the uninfected controls  
430 based on each of these cutoffs (**S2B Fig**). The number of differentially expressed genes (DEGs)  
431 identified increased up to a cutoff of 0.001 virus/total reads and then plateaued. Moreover, DEGs  
432 identified by a cutoff of 0.001 largely overlapped (over 90%) with those detected with higher  
433 cutoffs, confirming that the cutoff of 0.001 is robust in distinguishing between infected cells with  
434 high and low vRNA abundance. We predicted that differential expression of some genes might  
435 be related to time effect resulting from differences in incubation duration rather than from viral  
436 infection. To control for such confounders, we calculated Spearman's correlation coefficients  
437 between gene expression and time postinfection. Genes whose expression was similarly altered  
438 over time between infected and uninfected cells were thought to represent time effect. 1707 of  
439 the 1734 DEGs between the high vRNA and uninfected groups passed this additional filter (**Fig**  
440 **2A**).

441  
442 In parallel, we computed Spearman's rank correlation coefficients between gene expression and  
443 vRNA abundance across all cells, as done previously for flaviviruses (23). Our data indicate that

444 the majority of host genes are negatively correlated with vRNA abundance (**S2C Fig**).  
445 Stratifying host genes by expression level in uninfected cells indicated that highly expressed  
446 genes demonstrated a stronger negative correlation with vRNA abundance (**S2D Fig**), suggesting  
447 that cellular functions relying on highly expressed genes are more vulnerable to VEEV infection.  
448 To identify genes that are both differentially expressed between infected and uninfected cells and  
449 correlated with vRNA, we computed the intersection between the 1707 DEGs with the top 600  
450 genes that either positively (n=300) or negatively (n=300) correlated with vRNA. 263  
451 overlapping genes emerged from this analysis (**Fig 2A**).  
452  
453 Gene Ontology (GO) enrichment analysis of these 263 genes via metasplice (41) highlighted  
454 metabolism of RNA as the most enriched molecular function term (**Fig 2A**). Shown in **Figs 2B,**  
455 **2C** and **S2E** are representative genes that were overexpressed in high vRNA cells vs. uninfected  
456 and low vRNA and positively correlated with vRNA (TNFAIP3), underexpressed and negatively  
457 correlated with vRNA (TAF7), or not differentially expressed and were uncorrelated with vRNA  
458 (COPZ2). The expression level of these genes did not change over time in uninfected cells,  
459 supporting that their altered levels represent actual differences between the groups rather than a  
460 time effect (**S2F Fig**).

461  
462 **Early infected “superproducer” cells show distinct patterns of host gene expression.**  
463 During cell processing, we noticed that 2% of the cells infected with an MOI of 1 at 6 hpi, the  
464 duration of a single cycle of VEEV replication (7,42), showed stronger GFP signals (FITC gate  
465 readout > 1000) than the remaining cells in the same condition. To probe the relevance of this  
466 unexpected finding, we specifically sorted these cells. In correlation with their GFP expression,  
467 the majority of these cells harbored ~100-fold higher virus/total reads ratio than the remaining  
468 cells in the same condition, suggesting that once initiated, viral replication proceeded extremely

469 fast in these “superproducer” cells (**Fig 3A**). 11 cells were defined as “superproducer” cells  
470 based on the following criteria: harboring > 0.001 vRNA/total reads and GFP readout > 1000 at  
471 6 hpi (MOI = 1) (**Fig 3A**). To elucidate whether these “superproducer” cells exhibit a distinct  
472 gene expression pattern, we conducted differential gene expression analysis (Mann-Whitney U  
473 test) between these 11 cells and uninfected cells as well as low vRNA harboring cells, both  
474 harvested at the same time point (6 hpi). A total of 16 DEGs were identified showing a distinct  
475 expression pattern only in these “superproducers”, with representative overexpressed and  
476 underexpressed genes shown in **Fig 3B** and **Fig 3C**. Notably, these genes were also differentially  
477 expressed between the “superproducer” cells and high vRNA cells harvested at 24 hpi,  
478 suggesting that they do not represent a general response to high vRNA abundance, but rather a  
479 unique feature of this cell population. Among the overexpressed genes were SYTL3, a protein  
480 that directly binds to Rab27A to regulate Rab27-dependent membrane trafficking; KDM3B, a  
481 lysine demethylase; SNX29, a member of the sorting nexin family; and COG5, a component of  
482 Golgi-localized complex that is essential for Golgi function. Among the underexpressed genes  
483 were ZMAT5, an RNA-binding protein belonging to the CCCH zinc finger family of proteins  
484 implicated in antiviral immune regulation (43); VPS37A, a component of the ESCRT-I protein  
485 complex; and AC087343.1, a ribosomal protein L21 pseudogene. These findings provide  
486 evidence that a small subset of “superproducer” cells largely drives VEEV replication during the  
487 first viral life cycle and demonstrates a distinct gene expression pattern. These results also point  
488 to SYTL3, KDM3B, SNX29 and COG5 as candidate proviral factors, and to ZMAT5, VPS37A  
489 and AC087343.1 as potential antiviral factors.

490

491 **The expression of genes involved in intracellular membrane trafficking correlates with the**  
492 **ratio of 3’ to 5’ vRNA reads.**

493 By including both a poly-T and a 5'-end specific capture oligonucleotides in the viscRNA-Seq,  
494 good read coverage at both ends of the VEEV genome was obtained (**Fig 4A**). We defined 5'  
495 RNA reads as those corresponding to the first 1,700 bases (encoding nonstructural proteins), and  
496 thus derived from the genomic vRNA only, and 3' RNA reads as those corresponding to the last  
497 third of the genome (encoding structural proteins), derived from both the genomic and  
498 subgenomic vRNAs (**Fig 4B**). The stoichiometry of the 3' and 5' RNAs was highly  
499 heterogeneous between cells. While at early stages of infection, the 3' to 5' (structural to  
500 nonstructural) vRNA read ratio (3'/5' read ratio), as defined by these genomic regions, was  
501 below or around 1, at late stages, it reached up to 4 and was correlated with total vRNA  
502 abundance (**Fig 4C**). In contrast, the read ratio between two segments we selected as internal  
503 controls at the 5' end of the vRNA (5'a/5'b read ratio) and between two segments at the 3' end  
504 (3'a/3'b read ratio) did not correlate with the cellular vRNA abundance (**Figs 4D-4E**). To test the  
505 hypothesis that differences in vRNA stoichiometry are associated with distinct host responses,  
506 we measured the Spearman's correlation coefficients of all host genes with the 3'/5' read ratio in  
507 the same cell. The resulting histogram distribution curve revealed a tail of host genes whose  
508 expression increased with the 3'/5' read ratio (**Fig 4F**), in contrast to the distribution of host  
509 genes in correlation with the total vRNA reads (**S2C Fig**). Positively correlated genes were  
510 mostly involved in various aspects of intracellular trafficking and included factors previously  
511 reported to be required for VEEV infection via an siRNA screen including ARP3 (19), RAC2, a  
512 paralog of RAC1 (19), and DDX5, a member of the DEAD box family of RNA helicases (20).  
513 Novel factors among the positively correlated genes included factors involved in late endosomal  
514 trafficking (RAB7A (44), the accessory ESCRT factor (BROX) (45), and the SNARE protein  
515 VAMP7 (46)), as well as in ER to Golgi trafficking (SEC22B) (47), regulation of secretion  
516 (PIP4K2A) (48), lysosome function and autophagy (LAMP2) (49), actin polymerization (PFN2)  
517 (50), and acidification of intracellular organelles for protein sorting (ATP6V1B2) (51) (**Fig 4G**).

518 Accordingly, pathway analysis on the top 300 correlated genes identified macroautophagy,  
519 exocytosis regulation, membrane trafficking and vesicle organization as the highly enriched  
520 functions (**Fig 4H**). Notably, these genes were only positively correlated with the 3'/5' read  
521 vRNA ratio and not with the total vRNA reads. These findings indicate that the late stages of  
522 VEEV infection are characterized by heterogeneous stoichiometry of structural (3') and  
523 nonstructural (5') vRNAs and upregulation of intracellular trafficking pathways previously  
524 implicated in assembly and egress of various RNA viruses in cells with an excess of structural  
525 vRNA. Moreover, these results highlight the unique opportunity to discover candidate proviral  
526 factors for VEEV-TC-83 infection by correlating gene expression with specific viral genome  
527 stoichiometry via viscRNA-Seq.

528

529 In addition to enabling quantification of the 5' and 3' vRNA reads, the high coverage of the viral  
530 genome provided by viscRNA-Seq revealed rare structural viral read variants. The most common  
531 among these variants was a 36-base gap within the coding region of the 6K protein, whose  
532 presence was predicted to form a stable hairpin structure (**S1 Text** and **S3 Fig**). The biological  
533 relevance of this gap remains to be elucidated, and we cannot currently exclude that it could be a  
534 result of polymerase errors during library preparation. However, stable RNA structures play  
535 essential roles in viral replication and tropism across multiple viruses. Moreover, it is possible  
536 that this finding represents the presence of defective virus genomes, which have been observed  
537 in various RNA viruses (52,53).

538

### 539 **Validation of candidate proviral and antiviral factors.**

540 Next, we probed the functional relevance of 11 genes that either strongly or moderately  
541 correlated with vRNA abundance for viral infection. We first conducted loss-of-function screens  
542 by measuring the effect of siRNA-mediated depletion of these 11 individual genes on VEEV-

543 TC-83 infection and cellular viability in U-87 MG cells (**Fig 5A**). The knockdown efficiency of  
544 the relevant transcripts was confirmed by qRT-PCR (**S4A Fig**). Depletion of CXCL3, ATF3,  
545 TNFAIP3, and CXCL2, four out of five genes tested that positively correlated with vRNA  
546 abundance via viscrRNA-Seq (orange bars), reduced VEEV-TC-83 infection by more than 40%  
547 as measured by luciferase assay 18 hpi with a nano-luciferase reporter TC-83 virus (VEEV-TC-  
548 83-nLuc) and normalized to cellular viability in two independent screens, suggesting that they  
549 are candidate proviral factors (**Fig 5A** and **S4B-S4C Fig**). In contrast, depletion of 3 of 6 genes  
550 tested that negatively correlated with vRNA (grey bars) enhanced VEEV-TC-83 infection,  
551 suggesting that these proteins may function as antiviral factors (**Fig 5A** and **S4B-S4C Fig**).  
552 Suppression of PPP2CA demonstrated no effect on viral infection, suggesting that it is either  
553 non-essential or not restricting (possibly due to redundancy in host factor requirement) (**Fig 5A**  
554 and **S4B-S4C Fig**).

555  
556 In parallel, we conducted gain-of-function screens by ectopically expressing the same 11  
557 individual gene products in U-87 MG cells followed by VEEV-TC-83-nLuc infection (**Fig 5B**).  
558 The level of ectopic expression of these factors was confirmed by Western blotting (**S4D Fig**).  
559 Using a cutoff of greater than 40% change in viral infection normalized to cell viability in two  
560 independent screens, overexpression of most genes resulted in an inverse effect to that observed  
561 with the siRNA, i.e. if knockdown inhibited viral infection, overexpression enhanced it and vice  
562 versa (**Fig 5A-5B** and **S4E-S4F Fig**). Overexpression of CXCL2, TNFAIP3, ATF3, and CXCL3  
563 increased VEEV-TC-83 infection, suggesting rate limitation associated with these candidate  
564 proviral factors (**Fig 5B** and **S4E-S4F Fig**). In contrast, overexpression of the majority of the  
565 anticorrelated gene products reduced VEEV-TC-83-nLuc infection via luciferase assays,  
566 suggestive of an antiviral phenotype (**Fig 5B** and **S4E-S4F Fig**).

567

568 To further probe these findings, we conducted loss-of-function experiments in U-87 MG cells  
569 infected with non-reporter VEEV-TC-83. Viral titers were measured via plaque assays in culture  
570 supernatants and intracellular vRNA levels were measured via qRT-PCR assays in lysates  
571 derived from cells transfected with individual siRNAs targeting 10 of the 11 cellular factors or  
572 with non-targeting (NT) control siRNA 24 hours postinfection (PPP2CA was excluded since  
573 altering its expression level did not impact infection). Similar to the luciferase assay results,  
574 suppression of CXCL2, TNFAIP3, ATF3, and CXCL3 expression reduced both the viral titer  
575 and intracellular vRNA (**S5A-S5B Fig**) with no effect on cell viability (**S5C Fig**), supporting a  
576 proviral phenotype. Depletion of TAF7, SURF4, and RAB1A, whose transcript levels  
577 anticorrelated with vRNA abundance, increased the luciferase signal (**Fig 5A**) but decreased the  
578 infectious viral titers and vRNAs in cells infected with the non-reporter VEEV-TC-83 (**S5A-S5B**  
579 **Fig**), highlighting differences between these assays, which measure different aspects of the viral  
580 life cycle, and suggesting a possible proviral role. Moreover, while the transcriptional level of  
581 TRMT10C and EIF4A3 anticorrelated with vRNA abundance, their gene products demonstrated  
582 a proviral phenotype in most assays (**Figs 5A-5B** and **S5A-S5B Fig**). These findings highlight  
583 the challenge of identifying antiviral factors within the context of a host transcriptional  
584 shutdown. The discrepancies observed with antiviral candidates may result from regulation of  
585 these genes at the translational level or from downstream effects of these multifunctional genes.  
586  
587 To probe the relevance of these findings in virulent VEEV infection, we measured the effect of  
588 depletion of these cellular factors via siRNAs on VEEV-TrD (Trinidad Donkey) strain infection  
589 via plaque assays at 24 hpi. Depletion of CXCL3 and EIF4A3 dramatically reduced VEEV-TrD  
590 titers (**S5D Fig**), similarly to the effect seen with TC-83 (**S5B Fig**). Depletion of TNFAIP3,  
591 ATF3, TAF7, and TRMT10C mildly to moderately reduced VEEV-TrD infection (**S5D Fig**).  
592 Interestingly, depletion of SURF4, an ER cargo receptor, increased virulent VEEV-TrD



593 infection, suggesting an antiviral effect in agreement with the prediction based on the viscrRNA-  
594 Seq data. However, siRNA knockdown of SURF4 decreased the viral RNA levels and the  
595 number of infectious particles released during infection with the attenuated VEEV-TC-83 strain  
596 (**S5D Fig**). In contrast, depletion of CXCL2 and RAB1A, which suppressed TC-83 viral titers  
597 (**S5B Fig**), had no apparent effect on TrD infection (**S5D Fig**).

598  
599 ARRDC3, a member of the arrestin family (54), was positively correlated with vRNA  
600 abundance, yet its depletion increased VEEV-TC-83 infection via most assays as well as VEEV-  
601 TrD infection (**Fig 5A** and **S5A** and **S5D Fig**), and its overexpression decreased infection (**Fig**  
602 **5B**), in contrast with the other four positively correlated genes tested. To probe this discrepancy,  
603 we measured the correlation of ARRDC3 expression with the 5' and 3' vRNA reads separately.  
604 Notably, ARRDC3 reads positively correlated with the 3' vRNA reads but negatively correlated  
605 with the 5' vRNA reads. In contrast, the other four proviral candidates positively correlated with  
606 both the 5' and 3' vRNA reads (**Fig 5C**). This finding suggests that ARRDC3 might have a dual  
607 function during VEEV infection. Together, these findings highlight the utility of viscrRNA-Seq in  
608 identifying candidate proviral and antiviral factors.

609  
610 **Comparative viscrRNA-Seq analysis across five RNA viruses reveals distinct and common**  
611 **cellular pathways affected by viral infection.**

612 To define the elements of the host response that are unique to VEEV or common across multiple  
613 unrelated viruses, we first compared the VEEV dataset with our previously published viscrRNA-  
614 Seq data from human hepatoma (Huh7) cells infected with DENV and ZIKV (23). Since the  
615 baseline gene expression levels in astrocytes (VEEV-TC-83) are different from those in  
616 hepatocytes (DENV, ZIKV), we limited the analysis to genes that were similarly expressed  
617 (within a 10-fold change) in uninfected Huh7 and U-87 MG cells. We selected cells with greater

618 than 2 vRNA reads per million joint (viral + host) reads and monitored how the expression of  
619 host genes changes with increasing vRNA abundance across the three infections. In all three  
620 viral infections, the majority of host genes were not correlated with vRNA abundance.  
621 Nevertheless, a number of host genes exhibited correlations with one or more viruses. Three  
622 robust patterns were identified (**Figs 6A-C**): genes, such as HSPA5, that were upregulated in  
623 DENV infection and downregulated in ZIKV and VEEV infections (**Fig 6A**); genes like NRBF2  
624 that were upregulated only during ZIKV infection (**Fig 6B**); and genes, such as SERP1, that were  
625 downregulated only in VEEV infection (**Fig 6C**). No genes that were upregulated only in VEEV  
626 infection could be identified. Beyond these general categories, the resulting patterns of viral and  
627 host expression were, however, quite complex.

628  
629 To circumvent the masking effect of VEEV transcriptional shutdown, we then compared the  
630 genes that positively correlated with the 3'/5' VEEV RNA ratio with those positively or  
631 negatively correlating with DENV or ZIKV vRNA (**Fig 6D**). This analysis revealed genes, such  
632 as BROX, GEM, and RNF114 that are positively correlated with the respective vRNA in all  
633 three viral infections, genes, such as CTSB and SPTLC1 that are positively correlated with 3'/5'  
634 VEEV RNA and ZIKV but not DENV vRNA, and genes that are positively correlated with 3'/5'  
635 VEEV RNA but negatively correlated with DENV and ZIKV vRNA, such as PFN2 and  
636 DPYSL2. In contrast, no large correlations were observed when a comparable number of random  
637 genes were similarly analyzed (**Fig 6E**). Pathway analysis on genes that are positively correlated  
638 with both the 3'/5' VEEV RNA ratio and the two flaviviral RNAs identified ER processing,  
639 glycosylation, SELK (part of Endoplasmic-Reticulum-Associated Degradation), tRNA synthesis,  
640 protein folding, virion assembly, and intracellular transport as the highly enriched functions  
641 (**S6A Fig**). In contrast, cell cycle and apoptosis regulation were the most highly enriched  
642 functions in pathway analysis on genes that were positively correlated with 3'/5' VEEV RNA

643 ratio but negatively correlated with the two flaviviral RNAs (**S6B Fig**). These results provide  
644 evidence that complex temporal dynamics exist across infections with different RNA viruses and  
645 highlight both common and unique cellular pathways that are altered by VEEV and flaviviruses.

646

647 Next, we expanded our comparative analysis by including published datasets derived from  
648 single-cell transcriptomic studies on different cell lines infected with two additional RNA  
649 viruses, influenza A virus (IAV) (24) and West Nile virus (WNV) (26) generated via 10x  
650 Genomics and Smart-seq2, respectively. Because different cell lines were used for different  
651 viruses, we calculated the ranks of the correlation coefficients between the expression of each  
652 host gene and vRNA for each virus, restricted the selection to the top and bottom 200 genes, and  
653 normalized the results between -1 and 1 for each virus. We then calculated the network of  
654 similarities between genes (55). Uniform Manifold Approximation and Projection (UMAP) for  
655 Dimension Reduction (56) and Leiden clustering (39) of the genes highlighted 8 gene clusters  
656 with different expression patterns during various viral infections (**Fig 6F**). To understand the  
657 meaning of these clusters, we performed double hierarchical clustering and observed that clusters  
658 2, 4, 0, and 3 were upregulated, while clusters 7, 5, 1, and 6 were mostly downregulated during  
659 viral infection (**Fig 6G**). DENV and ZIKV shared clusters for both upregulation and  
660 downregulation, as expected from their evolutionary proximity. The dendrogram of the five  
661 viruses was qualitatively consistent with the known phylogeny as derived from viral genomic  
662 sequences, which could indicate ancestral phenotypic signatures.

663

664 Overall, our analysis indicates that although comparing single cell viral infection data across  
665 species, cell lines, and technologies still presents challenges, this approach is informative in  
666 highlighting host genes and pathways that are commonly affected across very different viral  
667 families.

668

669 **Discussion**

670 We and others have recently characterized the cellular response in virus infected cell lines  
671 (23,24), primary cells (26,57) and patient samples (27) via single-cell RNA-seq approaches.  
672 Moreover, we reported unique and overlapping determinants in the host response to two related  
673 flaviviruses at a single cell resolution (23). Nevertheless, the host transcriptomic response to  
674 infection with alphaviruses, which induces a profound transcriptional shutdown of host genes,  
675 has not been previously characterized at a single cell level, and the single-cell transcriptomic  
676 responses of unrelated viruses have not been compared. By applying viscRNA-Seq to study the  
677 temporal infection dynamics of VEEV-TC-83 in human astrocytoma cells, we revealed large  
678 cell-to-cell heterogeneity in VEEV and host gene expression, transcriptomic signatures in  
679 distinct cell subpopulations, and candidate proviral and antiviral factors, some of which we then  
680 validated. Additionally, we established a role for viscRNA-Seq in comparative evolutionary  
681 virology by demonstrating structural variants within the VEEV genome as well as unique and  
682 overlapping host gene responses across multiple clades of RNA viruses. These findings provide  
683 insights into the virus-host determinants that regulate VEEV-TC-83 infection and highlight the  
684 utility of viscRNA-Seq approaches and comparative single-cell transcriptomics.

685

686 A prominent feature of VEEV infection is a profound suppression of cellular transcription (6).  
687 Nevertheless, it remained unknown whether this transcriptional shutdown globally affects all  
688 host mRNAs. Computing the distributions of vRNA expression in correlation with 5 groups of  
689 genes, distinguished by the level of gene expression in uninfected cells, demonstrated that highly  
690 expressed genes are more likely to be negatively correlated with vRNA abundance than genes  
691 that are expressed at a lower level. The cellular energy and machinery required to maintain a

692 high level of gene expression likely play a role in increasing the vulnerability of highly  
693 expressed cellular genes to VEEV-induced transcriptional shutdown.

694

695 We have previously reported the utility of viscrRNA-Seq in discovering functional transcriptomic  
696 signatures and candidate pro- and antiviral factors of DENV and ZIKV infections (23,27).

697 Nevertheless, the high replication rate of VEEV and the transcriptional shutdown it induces

698 challenged our ability to detect alterations in gene expression and identify pro- and antiviral

699 factors. To overcome these challenges, we used several strategies. First, since the viscrRNA-Seq

700 analysis revealed large differences in vRNA abundance between cells infected with the same

701 MOI and harvested at the same time point, we stratified cell populations based on vRNA

702 abundance rather than time postinfection. Integrating differential gene expression and correlation

703 analyses of vRNA abundance with gene expression across the entire human transcriptome

704 facilitated the discovery of 263 genes that were both differentially expressed between the high

705 and mock infected controls and correlated with total vRNA. siRNA-mediated depletion and

706 overexpression of a subset of these genes revealed that overall, genes involved in cytokine

707 production, plus ATF3, a transcription factor commonly expressed in response to cellular stress,

708 and TNFAIP3, an inhibitor of NF $\kappa$ B signaling, demonstrated a phenotype consistent with a rate-

709 limiting proviral function. ARRDC3, one of 5 genes that were both differentially expressed and

710 positively correlated with total vRNA, demonstrated a phenotype consistent with antiviral rather

711 than a proviral effect. Interestingly, when studied in correlation with the individual vRNA

712 transcripts, ARRDC3, a signaling arrestin family protein and a cargo-specific endosomal

713 adaptor, was positively correlated with the 3' vRNA but negatively correlated with the 5' vRNA,

714 suggesting that it may have a proviral effect during later stages and an antiviral effect in earlier

715 stages of replication. By capturing such complex dynamics and not relying on averaging signals

716 at distinct time points postinfection for stratification, the viscrRNA-Seq approach may have an

717 advantage over bulk sample knockdown or knockout approaches in identifying factors required  
718 for or restrictive of VEEV infection.

719

720 Whereas the effect of altered expression level of factors predicted to be proviral based on  
721 viscRNA-Seq on TC-83 infection was largely consistent between the various functional assays,  
722 the phenotypes observed among the candidate antiviral factors whose transcript level  
723 anticorrelated with vRNA were less obvious. For example, depletion of TAF7, SURF4, and  
724 RAB1A increased the luciferase signal in VEEV-TC-83-nLuc infected cells but decreased the  
725 infectious viral titer and intracellular vRNA in cells infected with the non-reporter VEEV-TC-83  
726 strain, supporting a possible proviral rather than antiviral role. It is possible that the reduction in  
727 intracellular vRNA measured upon depletion of these factors reduced the translational shutdown  
728 induced by nsP2 (58), thereby increasing the luciferase signal. Similarly, the gene products of  
729 TRMT10C and EIF4A3 demonstrated a proviral phenotype in most assays. This difference  
730 between proviral and antiviral candidates is due to the asymmetric effect on gene expression  
731 caused by the host transcriptional shutdown. Since VEEV causes a global downregulation of the  
732 host transcriptome, it becomes challenging to distinguish *in silico* genes that are downregulated  
733 further because of specific virus-host interactions. In contrast, even weak positive correlations  
734 between vRNA abundance and host gene expression are suggestive of genes that are “spared”  
735 from the global transcriptional shutdown. Biologically, these findings may result from  
736 differential regulation of the antiviral candidates at the translational level or from downstream  
737 effects of these multifunctional genes. The phenotype exhibited by ARRDC3 in both TC-83 and  
738 TrD infections and by SURF4 in the context of TrD infection, were consistent with potential  
739 antiviral effects. Moreover, in the case of ARRDC3, the relative ratio of 5’/3’ viral transcripts  
740 (see below) was more in line with infectivity experiments than total amount of intracellular

741 vRNA indicating that virus-host interactions are not fully recapitulated by a single correlation  
742 coefficient.

743

744 The high resolution provided by viscRNA-Seq enabled us to further focus on distinct cell  
745 populations, which facilitated identification of additional transcriptomic signatures. We  
746 discovered a subpopulation of cells demonstrating unusually high viral replication upon  
747 completion of a single cycle of viral replication. Importantly, this cell subpopulation is  
748 associated with host cell gene expression that is distinct from cells harboring lower vRNA at the  
749 same time. It is intriguing to speculate that overexpression of the identified hits involved in  
750 intracellular membrane trafficking (such as SYTL3, SNX29 and COG5) concurrently with  
751 underexpression of factors implicated in antiviral immune responses (such as ZMAT5) in this  
752 cell population drive the rapid increase in viral replication during the first viral lifecycle.

753

754 To further increase the resolution of our analysis, we took advantage of the ability of viscRNA-  
755 Seq to detect the two VEEV-TC-83 transcripts. A prior study on IAV has detected different  
756 levels of various segments of the viral genome across cells and investigated how this finding  
757 relates to successful virion production (24). Similarly, analysis of the stoichiometry of the 5' and  
758 3' RNA reads of VEEV, a non-segmented virus, revealed a large cell-to-cell heterogeneity.  
759 Moreover, the 3'/5' vRNA ratio substantially increased at late stages of infection, consistent with  
760 previous reports with other alphaviruses (10). Remarkably, the histogram distribution curve of  
761 the Spearman's correlation coefficients of all host genes with the 3'/5' read ratio in the same cell  
762 revealed a long tail of host genes whose expression increased with the 3'/5' read ratio. Our  
763 findings indicate that these changes in stoichiometry of the vRNA transcripts during late stages  
764 of VEEV infection are associated with upregulation of distinct genes, particularly those involved  
765 in intracellular trafficking pathways. Notably, detection of these factors was only possible by

766 correlating their expression specifically with the 3'/5' vRNA ratio and not the total vRNA reads.  
767 The involvement of these factors specifically in cells harboring high 3'/5' vRNA read ratio thus  
768 makes it experimentally challenging to further study them via bulk sample approaches.  
769 Nevertheless, it is tempting to speculate that some of the discovered late endosomal trafficking  
770 and lysosomal proteins (RAB7A (44), BROX (45), VAMP7 (46) and LAMP2 (49)) may be  
771 involved in forming the CPV-I composed of modified endosomes and lysosomes in which  
772 VEEV RNA replication occurs (13–15,59–62), and that ATP6V1B2 (51) may mediate the  
773 acidification of this acidic intracellular compartment (42). Moreover, the positive correlation of  
774 proteins involved in ER to Golgi trafficking (SEC22B) (47), regulation of secretion (PIP4K2A)  
775 (48), autophagy (LAMP2) (49), actin polymerization (PFN2) (50), and ESCRT machinery  
776 (BROX, a Bro1 domain-containing protein like ALIX) (45,63), TSG101 and STAM2) with the  
777 3'/5' vRNA read ratio proposes roles for these factors in late stages of the VEEV lifecycle, such  
778 as trafficking of the CPV-IIIs to the plasma membrane, virion assembly, and/or budding (16–18).  
779 These results propose a model wherein specific genes are upregulated within the profound  
780 transcriptional downregulation in a stoichiometry-dependent manner, and further illuminate the  
781 utility of viscRNA-Seq in identifying candidate proviral and antiviral factors, including  
782 druggable candidates for host-targeted antiviral approaches.  
783  
784 One limitation of our study is the utilization of the vaccine (TC-83), rather than wild type strain  
785 of VEEV in the viscRNA-seq experiments. TC-83 was developed by serial passaging of the  
786 virulent, subtype IAB TrD VEEV strain (64). While TC-83 maintains some degree of virulence  
787 manifesting with systemic illness and high level viremia in ~40% of vaccinated people (65,66)  
788 and horses (67), and with significant morbidity and mortality in mice upon subcutaneous or  
789 intracerebral inoculation, respectively (68), it is attenuated relative to wild type VEEV. Its  
790 attenuated phenotype results from two point mutations; one in nucleotide G3A within the 5'



791 UTR, which increases the sensitivity of the virus to IFN-beta treatment (69) and the other is a  
792 Thr-to-Lys substitution in residue 120 of the E2 protein, which increases viral binding to heparan  
793 sulfate on the cell surface and renders the virus less lethal in mice (70–72). These properties  
794 make the TC-83 strain suboptimal for studying some aspects of the immune response to VEEV  
795 infection, particularly at the organism level. Another limitation of the study is the use of the U-87  
796 MG cell line rather than primary human cells. U-87 MG is the most widely used cell line for  
797 investigating VEEV-host interaction, with some examples reported here (73,74). However, since  
798 derived from malignant glioma, like many other transformed cell lines, U-87 MG cells have  
799 altered type 1 IFN responses (75). Combined, these factors have restricted our ability to capture  
800 some elements of the authentic host response to wild type VEEV infection, such as type I  
801 interferon response, and might limit the relevance of some of the findings in the context of *in*  
802 *vivo* infection.

803  
804 Nevertheless, the key advantage of using the U-87 MG cell line is that it enabled the detection of  
805 subtle expression changes that would have been harder to detect in interferon-competent cells.  
806 These cells typically exhibit a substantial upregulation of numerous interferon-stimulated and  
807 related genes, masking important pathways associated with viral replication (vs. innate  
808 immunity). Indeed, when comparing DENV infection in IFN-deficient Huh7 cells (23) with  
809 infection in primary immune cells (27), this was precisely the dominant difference we observed.  
810 Moreover, our functional experiments demonstrate that while some findings, such as the  
811 requirement for CXCL2 observed in TC-83 infection, are not relevant to virulent VEEV-TrD  
812 infection, the requirement for CXCL3, EIF4A3, ATF3 and TAF7, and the potential antiviral  
813 effect of ARRDC3 may be functionally relevant to infection with both viral strains. Lastly, this  
814 study establishes the feasibility and utility of applying viscRNA-Seq to study other viruses from  
815 the VEE complex. The comparison between TC-83, its parental strain TrD, and other subtypes

816 within the VEE complex could give an insight into viral evolution and virus-host interactions. In  
817 addition, applying viscRNA-Seq to study other alphaviruses can illuminate distinct host  
818 responses caused by viruses belonging to different subgroups (encephalitic vs arthritogenic).  
819  
820 Comparative evolutionary virology is an ideal application for single cell technologies because of  
821 the degree of genomic and functional diversity of infections. As a proof of concept, we compared  
822 the effect of unrelated human RNA viruses on the host cell in permissive cell lines. To address  
823 the confounding effect of different cell line backgrounds, we restricted the analyses in **Figs 6A-F**  
824 to genes with a similar baseline expression level across cell lines. We compared genes that  
825 positively correlated with the 3'/5' VEEV RNA ratio with those correlating with DENV or ZIKV  
826 vRNA and found concordant signal for genes involved in protein processing and transport,  
827 whereas some cell cycle and apoptosis genes appeared to be specific to VEEV. When comparing  
828 data on five different viruses derived using different cell lines and technologies, we observed that  
829 while the closely related flaviviruses DENV and ZIKV affect a highly overlapping set of genes  
830 in both up and downregulation, more distant evolutionary relationships between the viruses lead  
831 to essentially distinct lists of dysregulated host genes. Moreover, the “correct” viral phylogeny  
832 grouping of all three flaviviruses as a monophyletic group could be recovered purely from the  
833 host transcriptome perturbations, i.e. without using viral genomic information, which is  
834 intriguing. More viruses across the viral phylogeny should be assessed to evaluate whether this  
835 signal is the result of conserved ancestral function or, alternatively, of convergent functional  
836 evolution.  
837  
838 Overall, our study uncovered global and gene-specific host transcriptional dynamics during  
839 VEEV-TC-83 infection in a human astrocytoma cell line at single cell resolution and presented a  
840 novel approach to elucidate the evolution of virus-host interactions.

841

842

843 **Acknowledgements**

844 This work was supported by HDTRA11810039 from the Defense Threat Reduction Agency

845 (DTRA)/Fundamental Research to Counter Weapons of Mass Destruction, by the Chan

846 Zuckerberg Biohub, and by a Stanford Bio-X Interdisciplinary Initiative Program Award. ZY

847 was supported by the Maternal and Child Health Research Institute, Lucile Packard Foundation

848 for Children's Health). NP was supported by the University of Washington School of Medicine

849 Guy Tribble and Susan Barnes Graduate Discovery Fellowship. We thank investigators who

850 have provided plasmids (see Methods). The opinions, interpretations, conclusions, and

851 recommendations are those of the authors and are not necessarily endorsed by the U.S. Army or

852 the other funders.

853

854 **Competing interests:** The authors declare that no competing interests exist.

855

856

857 **References:**

858 1. Sharma A, Knollmann-Ritschel B. Current Understanding of the Molecular Basis of Venezuelan  
859 Equine Encephalitis Virus Pathogenesis and Vaccine Development [Internet]. Vol. 11, Viruses.  
860 2019. p. 164. Available from: <http://dx.doi.org/10.3390/v11020164>

861 2. Aguilar PV, Estrada-Franco JG, Navarro-Lopez R, Ferro C, Haddow AD, Weaver SC. Endemic  
862 Venezuelan equine encephalitis in the Americas: hidden under the dengue umbrella. *Future Virol.*  
863 2011;6(6):721–40.

864 3. Hawley RJ, Eitzen EM Jr. Biological Weapons—a Primer for Microbiologists [Internet]. Vol. 55,  
865 Annual Review of Microbiology. 2001. p. 235–53. Available from:  
866 <http://dx.doi.org/10.1146/annurev.micro.55.1.235>

867 4. Berge TO, Banks IS, Tigertt WD, Others. Attenuation of Venezuelan Equine Encephalomyelitis  
868 Virus by *in vitro* Cultivation in Guinea-Pig Heart Cells. *Am J Hyg.* 1961;73(2):209–18.

869 5. Keck F, Kortchak S, Bakovic A, Roberts B, Agrawal N, Narayanan A. Direct and indirect pro-  
870 inflammatory cytokine response resulting from TC-83 infection of glial cells [Internet]. Vol. 9,  
871 Virulence. 2018. p. 1403–21. Available from: <http://dx.doi.org/10.1080/21505594.2018.1509668>

872 6. Garmashova N, Atasheva S, Kang W, Weaver SC, Frolova E, Frolov I. Analysis of Venezuelan

- 873 equine encephalitis virus capsid protein function in the inhibition of cellular transcription. *J Virol.*  
874 2007 Dec;81(24):13552–65.
- 875 7. Strauss JH, Strauss EG. The alphaviruses: gene expression, replication, and evolution. *Microbiol*  
876 *Rev.* 1994 Sep;58(3):491–562.
- 877 8. Shirako Y, Strauss JH. Cleavage between nsP1 and nsP2 initiates the processing pathway of Sindbis  
878 virus nonstructural polyprotein P123. *Virology.* 1990 Jul;177(1):54–64.
- 879 9. Lemm JA, Rümenapf T, Strauss EG, Strauss JH, Rice CM. Polypeptide requirements for assembly  
880 of functional Sindbis virus replication complexes: a model for the temporal regulation of minus- and  
881 plus-strand RNA synthesis [Internet]. Vol. 13, *The EMBO Journal.* 1994. p. 2925–34. Available  
882 from: <http://dx.doi.org/10.1002/j.1460-2075.1994.tb06587.x>
- 883 10. Raju R, Huang HV. Analysis of Sindbis virus promoter recognition in vivo, using novel vectors with  
884 two subgenomic mRNA promoters. *J Virol.* 1991 May;65(5):2501–10.
- 885 11. Levis R, Schlesinger S, Huang HV. Promoter for Sindbis virus RNA-dependent subgenomic RNA  
886 transcription. *J Virol.* 1990 Apr;64(4):1726–33.
- 887 12. Kielian M, Chanel-Vos C, Liao M. Alphavirus Entry and Membrane Fusion. *Viruses.* 2010 Mar  
888 26;2(4):796–825.
- 889 13. Spuul P, Balistreri G, Kaariainen L, Ahola T. Phosphatidylinositol 3-Kinase-, Actin-, and  
890 Microtubule-Dependent Transport of Semliki Forest Virus Replication Complexes from the Plasma  
891 Membrane to Modified Lysosomes [Internet]. Vol. 84, *Journal of Virology.* 2010. p. 7543–57.  
892 Available from: <http://dx.doi.org/10.1128/jvi.00477-10>
- 893 14. Grimley PM, Berezesky IK, Friedman RM. Cytoplasmic structures associated with an arbovirus  
894 infection: loci of viral ribonucleic acid synthesis. *J Virol.* 1968 Nov;2(11):1326–38.
- 895 15. Kujala P, Ikäheimonen A, Ehsani N, Vihinen H, Auvinen P, Kääriäinen L. Biogenesis of the Semliki  
896 Forest virus RNA replication complex. *J Virol.* 2001 Apr;75(8):3873–84.
- 897 16. Garoff H, Wilschut J, Liljeström P, Wahlberg JM, Bron R, Suomalainen M, et al. Assembly and  
898 entry mechanisms of Semliki Forest virus. *Arch Virol Suppl.* 1994;9:329–38.
- 899 17. Griffiths G, Quinn P, Warren G. Dissection of the Golgi complex. I. Monensin inhibits the transport  
900 of viral membrane proteins from medial to trans Golgi cisternae in baby hamster kidney cells  
901 infected with Semliki Forest virus. *J Cell Biol.* 1983 Mar;96(3):835–50.
- 902 18. Soonsawad P, Xing L, Milla E, Espinoza JM, Kawano M, Marko M, et al. Structural evidence of  
903 glycoprotein assembly in cellular membrane compartments prior to Alphavirus budding. *J Virol.*  
904 2010 Nov;84(21):11145–51.
- 905 19. Radoshitzky SR, Pegoraro G, Chī XO, D Ng L, Chiang C-Y, Jozwick L, et al. siRNA Screen  
906 Identifies Trafficking Host Factors that Modulate Alphavirus Infection. *PLoS Pathog.* 2016  
907 Mar;12(3):e1005466.
- 908 20. Amaya M, Brooks-Faulconer T, Lark T, Keck F, Bailey C, Raman V, et al. Venezuelan equine  
909 encephalitis virus non-structural protein 3 (nsP3) interacts with RNA helicases DDX1 and DDX3 in  
910 infected cells. *Antiviral Res.* 2016 Jul;131:49–60.
- 911 21. Gupta P, Sharma A, Han J, Yang A, Bhomia M, Knollmann-Ritschel B, et al. Differential host gene  
912 responses from infection with neurovirulent and partially-neurovirulent strains of Venezuelan equine

- 913           encephalitis virus. *BMC Infect Dis*. 2017 Apr 26;17(1):309.
- 914   22.   Atasheva S, Akhrymuk M, Frolova EI, Frolov I. New PARP gene with an anti-alphavirus function. *J*  
915       *Virol*. 2012 Aug;86(15):8147–60.
- 916   23.   Zanini F, Pu S-Y, Bekerman E, Einav S, Quake SR. Single-cell transcriptional dynamics of  
917       flavivirus infection. *Elife* [Internet]. 2018 Feb 16;7. Available from:  
918       <http://dx.doi.org/10.7554/eLife.32942>
- 919   24.   Russell AB, Trapnell C, Bloom JD. Extreme heterogeneity of influenza virus infection in single  
920       cells. *Elife* [Internet]. 2018 Feb 16;7. Available from: <http://dx.doi.org/10.7554/eLife.32303>
- 921   25.   Russell AB, Elshina E, Kowalsky JR, Te Velthuis AJW, Bloom JD. Single-Cell Virus Sequencing of  
922       Influenza Infections That Trigger Innate Immunity. *J Virol* [Internet]. 2019 Jul 15;93(14). Available  
923       from: <http://dx.doi.org/10.1128/JVI.00500-19>
- 924   26.   O’Neal JT, Upadhyay AA, Wolabaugh A, Patel NB, Bosinger SE, Suthar MS. West Nile Virus-  
925       Inclusive Single-Cell RNA Sequencing Reveals Heterogeneity in the Type I Interferon Response  
926       within Single Cells. *J Virol* [Internet]. 2019 Mar 15;93(6). Available from:  
927       <http://dx.doi.org/10.1128/JVI.01778-18>
- 928   27.   Zanini F, Robinson ML, Croote D, Sahoo MK, Sanz AM, Ortiz-Lasso E, et al. Virus-inclusive  
929       single-cell RNA sequencing reveals the molecular signature of progression to severe dengue. *Proc*  
930       *Natl Acad Sci U S A*. 2018 Dec 26;115(52):E12363–9.
- 931   28.   Sun C, Gardner CL, Watson AM, Ryman KD, Klimstra WB. Stable, high-level expression of  
932       reporter proteins from improved alphavirus expression vectors to track replication and dissemination  
933       during encephalitic and arthritogenic disease. *J Virol*. 2014;88(4):2035–46.
- 934   29.   Rual J-F, Hirozane-Kishikawa T, Hao T, Bertin N, Li S, Dricot A, et al. Human ORFeome version  
935       1.1: a platform for reverse proteomics. *Genome Res*. 2004 Oct;14(10B):2128–35.
- 936   30.   Coutant EP, Goyard S, Hervin V, Gagnot G, Baatallah R, Jacob Y, et al. Gram-scale synthesis of  
937       luciferins derived from coelenterazine and original insights into their bioluminescence properties.  
938       *Org Biomol Chem*. 2019 Apr 10;17(15):3709–13.
- 939   31.   Coutant EP, Gagnot G, Hervin V, Baatallah R, Goyard S, Jacob Y, et al. Bioluminescence Profiling  
940       of NanoKAZ/NanoLuc Luciferase Using a Chemical Library of Coelenterazine Analogues  
941       [Internet]. *Chemistry – A European Journal*. 2019. Available from:  
942       <http://dx.doi.org/10.1002/chem.201904844>
- 943   32.   Dobin A, Davis CA, Schlesinger F, Drenkow J, Zaleski C, Jha S, et al. STAR: ultrafast universal  
944       RNA-seq aligner. *Bioinformatics*. 2013 Jan 1;29(1):15–21.
- 945   33.   Anders S, Pyl PT, Huber W. HTSeq—a Python framework to work with high-throughput sequencing  
946       data. *Bioinformatics* [Internet]. 2015; Available from:  
947       <https://academic.oup.com/bioinformatics/article-abstract/31/2/166/2366196>
- 948   34.   Butler A, Hoffman P, Smibert P, Papalexi E, Satija R. Integrating single-cell transcriptomic data  
949       across different conditions, technologies, and species. *Nat Biotechnol*. 2018 Jun;36(5):411–20.
- 950   35.   Wickham H. *ggplot2: Elegant Graphics for Data Analysis*. Springer; 2016. 260 p.
- 951   36.   Hunter JD. *Matplotlib: A 2D Graphics Environment*. *Comput Sci Eng*. 2007 May 1;9(3):90–5.

- 952 37. Waskom ML, Kumaran D, Gordon AM, Rissman J, Wagner AD. Frontoparietal representations of  
953 task context support the flexible control of goal-directed cognition. *J Neurosci*. 2014 Aug  
954 6;34(32):10743–55.
- 955 38. Hoyer S, Hamman J. xarray: ND labeled arrays and datasets in Python. *Journal of Open Research*  
956 *Software* [Internet]. 2017;5(1). Available from:  
957 <https://openresearchsoftware.metajnl.com/articles/148/>
- 958 39. Traag VA, Waltman L, van Eck NJ. From Louvain to Leiden: guaranteeing well-connected  
959 communities [Internet]. Vol. 9, *Scientific Reports*. 2019. Available from:  
960 <http://dx.doi.org/10.1038/s41598-019-41695-z>
- 961 40. PontÉN JAN, Macintyre EH. Long term culture of normal and neoplastic human glia. *Acta Pathol*  
962 *Microbiol Scand*. 1968;74(4):465–86.
- 963 41. Zhou Y, Zhou B, Pache L, Chang M, Khodabakhshi AH, Tanaseichuk O, et al. Metascape provides a  
964 biologist-oriented resource for the analysis of systems-level datasets. *Nat Commun*. 2019 Apr  
965 3;10(1):1523.
- 966 42. Jose J, Taylor AB, Kuhn RJ. Spatial and Temporal Analysis of Alphavirus Replication and  
967 Assembly in Mammalian and Mosquito Cells. *MBio* [Internet]. 2017 Feb 14;8(1). Available from:  
968 <http://dx.doi.org/10.1128/mBio.02294-16>
- 969 43. Fu M, Blackshear PJ. RNA-binding proteins in immune regulation: a focus on CCCH zinc finger  
970 proteins. *Nat Rev Immunol*. 2017 Feb;17(2):130–43.
- 971 44. Verhoeven K, De Jonghe P, Coen K, Verpoorten N, Auer-Grumbach M, Kwon JM, et al. Mutations  
972 in the small GTP-ase late endosomal protein RAB7 cause Charcot-Marie-Tooth type 2B neuropathy.  
973 *Am J Hum Genet*. 2003 Mar;72(3):722–7.
- 974 45. Mu R, Dussupt V, Jiang J, Sette P, Rudd V, Chuenchor W, et al. Two distinct binding modes define  
975 the interaction of Brox with the C-terminal tails of CHMP5 and CHMP4B. *Structure*. 2012 May  
976 9;20(5):887–98.
- 977 46. Pryor PR, Jackson L, Gray SR, Edeling MA, Thompson A, Sanderson CM, et al. Molecular basis for  
978 the sorting of the SNARE VAMP7 into endocytic clathrin-coated vesicles by the ArfGAP Hrb. *Cell*.  
979 2008 Sep 5;134(5):817–27.
- 980 47. Zhang T, Wong SH, Tang BL, Xu Y, Hong W. Morphological and functional association of  
981 Sec22b/ERS-24 with the pre-Golgi intermediate compartment. *Mol Biol Cell*. 1999 Feb;10(2):435–  
982 53.
- 983 48. Rozenvayn N, Flaumenhaft R. Protein kinase C Mediates Translocation of Type II  
984 Phosphatidylinositol 5-Phosphate 4-Kinase Required for Platelet  $\alpha$ -Granule Secretion. *J Biol Chem*.  
985 2003 Mar 7;278(10):8126–34.
- 986 49. Hubert V, Peschel A, Langer B, Gröger M, Rees A, Kain R. LAMP-2 is required for incorporating  
987 syntaxin-17 into autophagosomes and for their fusion with lysosomes. *Biol Open*. 2016 Oct  
988 15;5(10):1516–29.
- 989 50. Honoré B, Madsen P, Andersen AH, Leffers H. Cloning and expression of a novel human profilin  
990 variant, profilin II. *FEBS Lett*. 1993 Sep 13;330(2):151–5.
- 991 51. Bernasconi P, Rausch T, Struve I, Morgan L, Taiz L. An mRNA from human brain encodes an  
992 isoform of the B subunit of the vacuolar H (+)-ATPase. *J Biol Chem*. 1990;265(29):17428–31.

- 993 52. Davis AR, Hiti AL, Nayak DP. Influenza defective interfering viral RNA is formed by internal  
994 deletion of genomic RNA. *Proc Natl Acad Sci U S A*. 1980 Jan;77(1):215–9.
- 995 53. Wang C, Forst CV, Chou T-W, Geber A, Wang M, Hamou W, et al. Cell-to-Cell Variation in  
996 Defective Virus Expression and Effects on Host Responses during Influenza Virus Infection. *MBio*  
997 [Internet]. 2020 Jan 14;11(1). Available from: <http://dx.doi.org/10.1128/mBio.02880-19>
- 998 54. Qi S, O’Hayre M, Gutkind JS, Hurley JH. Structural and biochemical basis for ubiquitin ligase  
999 recruitment by arrestin-related domain-containing protein-3 (ARRDC3). *J Biol Chem*. 2014 Feb  
1000 21;289(8):4743–52.
- 1001 55. Maaten L van der, Hinton G. Visualizing Data using t-SNE. *J Mach Learn Res*. 2008;9(Nov):2579–  
1002 605.
- 1003 56. McInnes L, Healy J, Melville J. UMAP: Uniform Manifold Approximation and Projection for  
1004 Dimension Reduction [Internet]. *arXiv [stat.ML]*. 2018. Available from:  
1005 <http://arxiv.org/abs/1802.03426>
- 1006 57. Gorman MJ, Caine EA, Zaitsev K, Begley MC, Weger-Lucarelli J, Uccellini MB, et al. An  
1007 Immunocompetent Mouse Model of Zika Virus Infection. *Cell Host Microbe*. 2018 May  
1008 9;23(5):672–85.e6.
- 1009 58. Bhalla N, Sun C, Matthew Lam LK, Gardner CL, Ryman KD, Klimstra WB. Host translation shutoff  
1010 mediated by non-structural protein 2 is a critical factor in the antiviral state resistance of Venezuelan  
1011 equine encephalitis virus. *Virology*. 2016 Sep;496:147–65.
- 1012 59. Salonen A, Vasiljeva L, Merits A, Magden J, Jokitalo E, Kääriäinen L. Properly folded nonstructural  
1013 polyprotein directs the semliki forest virus replication complex to the endosomal compartment. *J*  
1014 *Viol*. 2003 Feb;77(3):1691–702.
- 1015 60. Friedman RM, Levin JG, Grimley PM, Berezsky IK. Membrane-associated replication complex in  
1016 arbovirus infection. *J Virol*. 1972 Sep;10(3):504–15.
- 1017 61. Pietilä MK, van Hemert MJ, Ahola T. Purification of Highly Active Alphavirus Replication  
1018 Complexes Demonstrates Altered Fractionation of Multiple Cellular Membranes. *J Virol* [Internet].  
1019 2018 Apr 15;92(8). Available from: <http://dx.doi.org/10.1128/JVI.01852-17>
- 1020 62. Pietilä MK, Hellström K, Ahola T. Alphavirus polymerase and RNA replication [Internet]. Vol. 234,  
1021 *Virus Research*. 2017. p. 44–57. Available from: <http://dx.doi.org/10.1016/j.virusres.2017.01.007>
- 1022 63. Zhai Q, Landesman MB, Robinson H, Sundquist WI, Hill CP. Structure of the Bro1 domain protein  
1023 BROX and functional analyses of the ALIX Bro1 domain in HIV-1 budding. *PLoS One*. 2011 Dec  
1024 5;6(12):e27466.
- 1025 64. Berge TO, Banks IS, Tigertt WD. ATTENUATION OF VENEZUELAN EQUINE  
1026 ENCEPHALOMYELITIS VIRUS BY IN VITRO CULTIVATION IN GUINEA-PIG HEART  
1027 CELLS 1 [Internet]. Vol. 73, *American Journal of Epidemiology*. 1961. p. 209–18. Available from:  
1028 <http://dx.doi.org/10.1093/oxfordjournals.aje.a120178>
- 1029 65. Paessler S, Fayzulin RZ, Anishchenko M, Greene IP, Weaver SC, Frolov I. Recombinant  
1030 sindbis/Venezuelan equine encephalitis virus is highly attenuated and immunogenic. *J Virol*. 2003  
1031 Sep;77(17):9278–86.
- 1032 66. Alevizatos AC, McKinney RW, Feigin RD. Live, Attenuated Venezuelan Equine Encephalomyelitis  
1033 Virus Vaccine [Internet]. Vol. 16, *The American Journal of Tropical Medicine and Hygiene*. 1967. p.

- 1034 762–8. Available from: <http://dx.doi.org/10.4269/ajtmh.1967.16.762>
- 1035 67. Henderson BE, Chappell WA, Johnston JG Jr, Sudia WD. Experimental infection of horses with  
1036 three strains of Venezuelan equine encephalomyelitis virus. I. Clinical and virological studies. *Am J*  
1037 *Epidemiol.* 1971 Mar;93(3):194–205.
- 1038 68. Arya SC. Comparative neurovirulence of attenuated and non-attenuated strains of Venezuelan equine  
1039 encephalitis virus in mice [Internet]. Vol. 65, *The American Journal of Tropical Medicine and*  
1040 *Hygiene.* 2001. p. 1. Available from: <http://dx.doi.org/10.4269/ajtmh.2001.65.6.11792007>
- 1041 69. White LJ, Wang JG, Davis NL, Johnston RE. Role of alpha/beta interferon in Venezuelan equine  
1042 encephalitis virus pathogenesis: effect of an attenuating mutation in the 5' untranslated region. *J*  
1043 *Virol.* 2001 Apr;75(8):3706–18.
- 1044 70. Kinney RM, Chang GJ, Tsuchiya KR, Sneider JM, Roehrig JT, Woodward TM, et al. Attenuation of  
1045 Venezuelan equine encephalitis virus strain TC-83 is encoded by the 5'-noncoding region and the E2  
1046 envelope glycoprotein. *J Virol.* 1993 Mar;67(3):1269–77.
- 1047 71. Ferguson MC, Saul S, Fragkoudis R, Weisheit S, Cox J, Patabendige A, et al. Ability of the  
1048 Encephalitic Arbovirus Semliki Forest Virus To Cross the Blood-Brain Barrier Is Determined by the  
1049 Charge of the E2 Glycoprotein. *J Virol.* 2015 Aug;89(15):7536–49.
- 1050 72. Bernard KA, Klimstra WB, Johnston RE. Mutations in the E2 glycoprotein of Venezuelan equine  
1051 encephalitis virus confer heparan sulfate interaction, low morbidity, and rapid clearance from blood  
1052 of mice. *Virology.* 2000 Oct 10;276(1):93–103.
- 1053 73. Baer A, Lundberg L, Swales D, Waybright N, Pinkham C, Dinman JD, et al. Venezuelan Equine  
1054 Encephalitis Virus Induces Apoptosis through the Unfolded Protein Response Activation of EGR1. *J*  
1055 *Virol.* 2016 Jan 20;90(7):3558–72.
- 1056 74. Ahmed A, Bakovic A, Risner K, Kortchak S, Der Torossian Torres M, de la Fuente-Nunez C, et al.  
1057 Synthetic Host Defense Peptides Inhibit Venezuelan Equine Encephalitis Virus Replication and the  
1058 Associated Inflammatory Response. *Sci Rep.* 2020 Dec 8;10(1):21491.
- 1059 75. Lin AH, Burrascano C, Pettersson PL, Ibañez CE, Gruber HE, Jolly DJ. Blockade of type I  
1060 interferon (IFN) production by retroviral replicating vectors and reduced tumor cell responses to IFN  
1061 likely contribute to tumor selectivity. *J Virol.* 2014 Sep 1;88(17):10066–77.
- 1062
- 1063
- 1064
- 1065
- 1066
- 1067
- 1068
- 1069
- 1070
- 1071
- 1072
- 1073
- 1074
- 1075



1076 **Figures and legends**

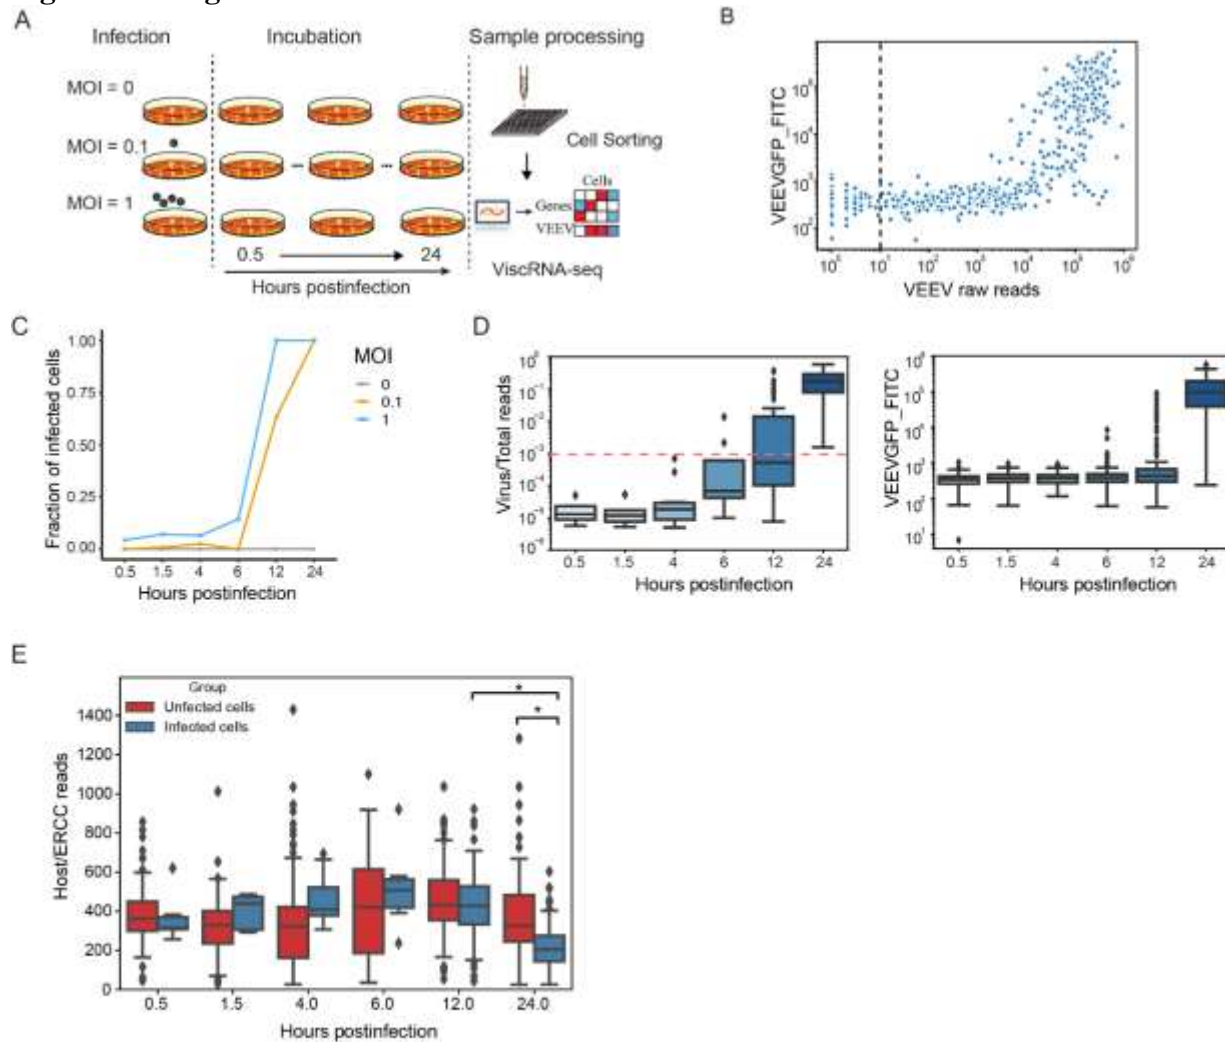

1077  
 1078  
 1079  
 1080  
 1081  
 1082  
 1083  
 1084  
 1085  
 1086  
 1087  
 1088  
 1089  
 1090  
 1091  
 1092

**Fig 1. Cell-to-cell heterogeneity during VEEV infection.** (A) Schematic of the experimental setup. (B) A scatter plot showing VEEV cDNA sequencing reads and GFP expression measured via FACS (FITC gate) in cells harboring 1 or more viral reads. The dotted line represents the cutoff of infected cells. Cells harboring more than 10 viral reads are considered infected. (C) The fraction of VEEV-TC-83-infected U-87 MG cells over time for two MOIs. (D) Box plots depicting the ratio of virus to total cDNA reads (left) and GFP expression level (right) over time. The horizontal dotted line represents the threshold dividing cells into “low vRNA” and “high vRNA” harboring cells (see text). (E) Box plots showing host cDNA to ERCC read ratio in infected and uninfected cells derived from different time points postinfection. \* $p < 0.05$  by Mann-Whitney U test. MOI, multiplicity of infection; ERCC, External RNA Controls Consortium.

1093

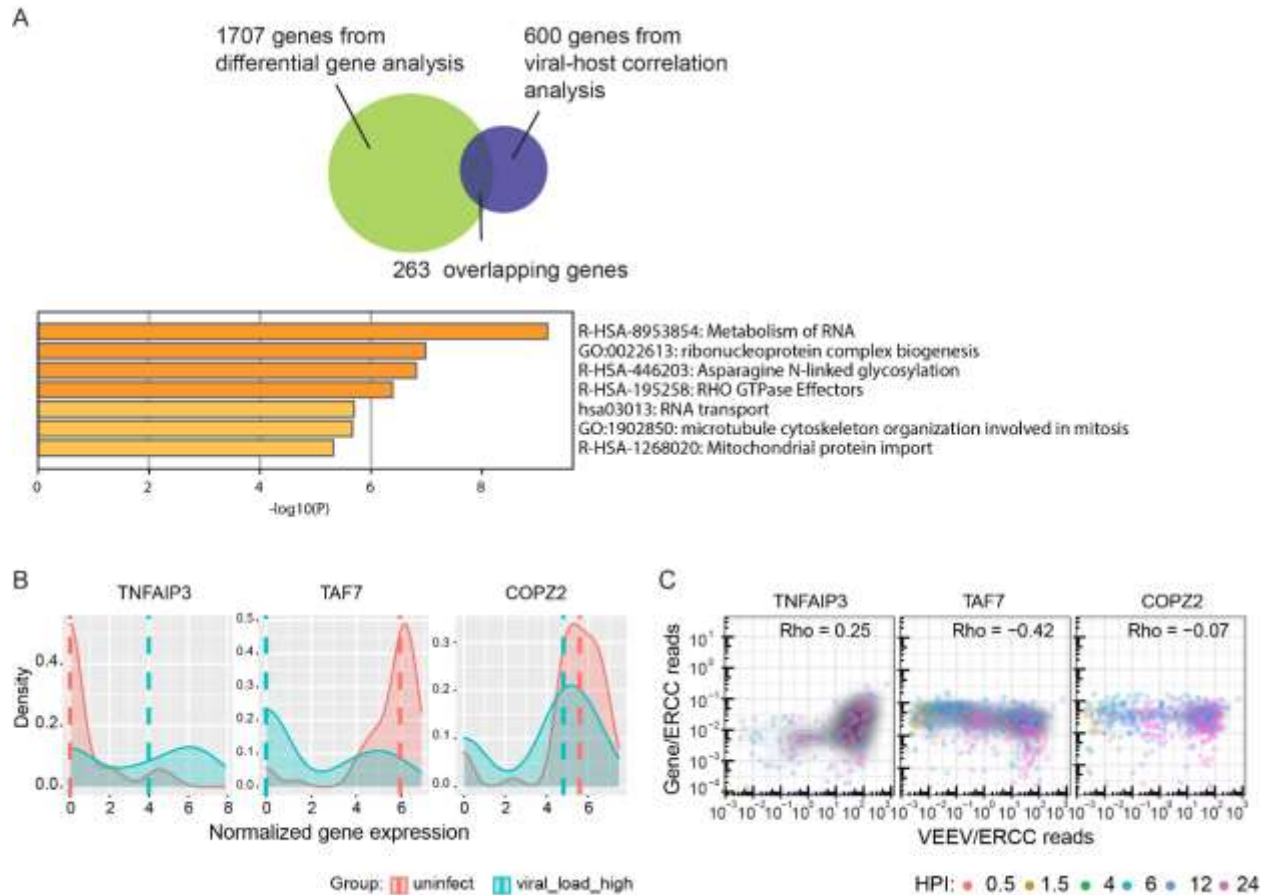

1094

1095

1096 **Fig 2. Host genes and pathways are altered during VEEV infection.** (A) A Venn diagram  
 1097 showing the number of unique and overlapping genes that emerged from the differentially gene  
 1098 expression analysis and host RNV/vRNA correlation analysis. Molecular function terms and P  
 1099 values derived from Gene Ontology (GO) enrichment analysis of 263 genes that are both  
 1100 differentially expressed between high vRNA and uninfected cells and correlated with vRNA. (B)  
 1101 Ridge plots of representative host genes that are differentially expressed between high vRNA  
 1102 and uninfected cells and a gene (COPZ2) whose level is unaltered. 50 cells from each group  
 1103 were selected for plotting. Dash lines indicate median expression level of the corresponding  
 1104 genes. Gene expression was normalized using the following formula:  $\ln((\text{gene counts} / \text{ERCC}$   
 1105  $\text{counts}) + 1)$ . (C) Representative scatter plots of host gene expression versus vRNA abundance  
 1106 and corresponding Rho Spearman's correlation coefficients. Each dot is a single cell colored by  
 1107 the time postinfection, and the shaded contours indicate cell density (greyscale, darker is higher).  
 1108 HPI, hours postinfection; MOI, multiplicity of infection; ERCC, External RNA Controls  
 1109 Consortium; TNFAIP3, Tumor Necrosis Factor Alpha-Induced Protein 3; TAF7, TATA-Box  
 1110 Binding Protein Associated Factor 7; COPZ2, COPI Coat Complex Subunit Zeta 2.

1111

1112

1113

1114

1115

1116

1117

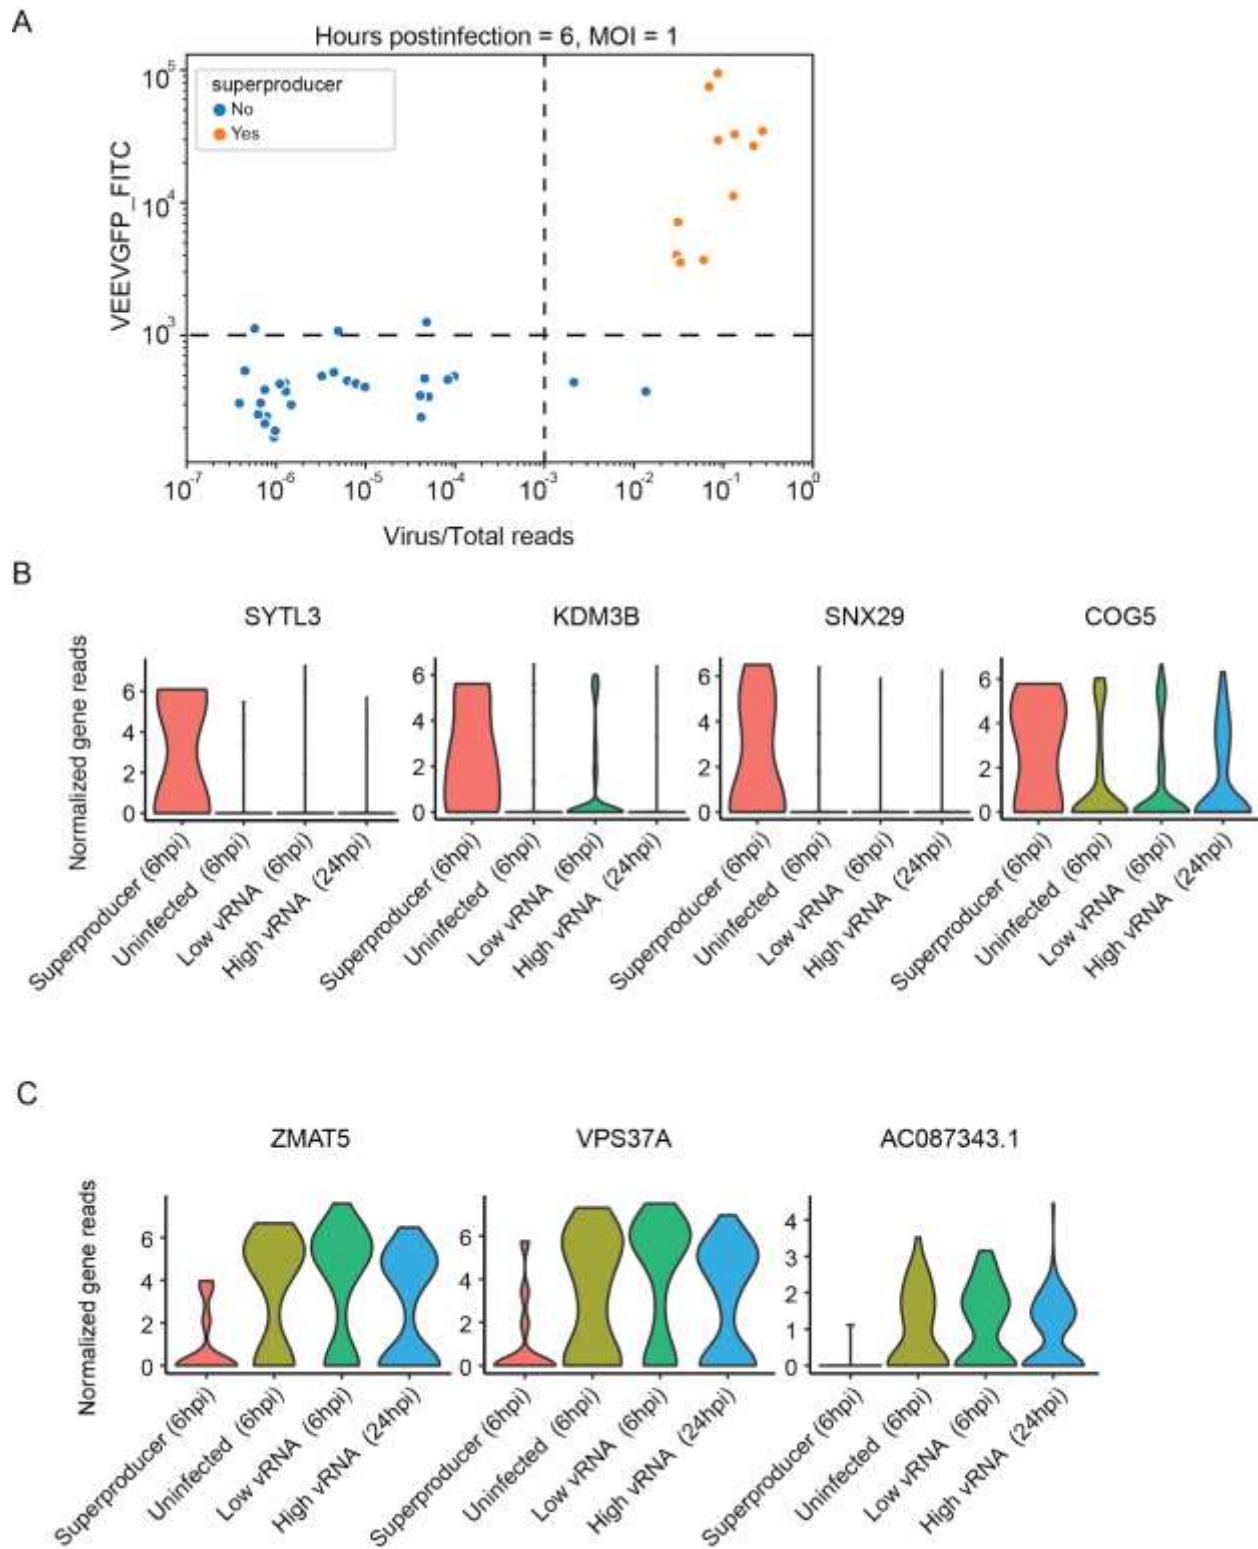

1118  
1119 **Fig 3. “Superproducer” cells exhibit altered gene expression patterns.** (A) Scatter plot  
1120 depicting GFP expression level and virus/total reads in cells at 6 hours postinfection (hpi) with  
1121 VEEV- TC-83 at an MOI of 1. The horizontal and vertical dash lines indicate the cutoffs of GFP  
1122 signal and virus/total read ratio, respectively (see text). Each dot represents a cell. Orange, cells  
1123 with a GFP signal readout that is greater than 1000 and virus/total read ratio greater than 0.001  
1124 defined as “superproducers” (n = 11); blue, cells not meeting these criteria. (B and C)

1125 Representative violin plots showing genes that are upregulated (B) or downregulated (C)  
1126 specifically in “superproducer” cells relative to either uninfected cells, low vRNA cells harvested  
1127 at 6 hpi or high vRNA cells harvested at 24 hpi. HPI, hours postinfection; MOI, multiplicity of  
1128 infection. SYTL3, Synaptotagmin Like 3; KDM3B, Lysine Demethylase 3B; SNX29, Sorting  
1129 Nexin 29; COG5, Component Of Oligomeric Golgi Complex 5; ZMAT5, Zinc Finger Matrin-  
1130 Type 5; VPS37A, Vacuolar Protein Sorting-Associated Protein 37A; AC087343.1, Ribosomal  
1131 Protein L21 (RPL21) Pseudogene.  
1132

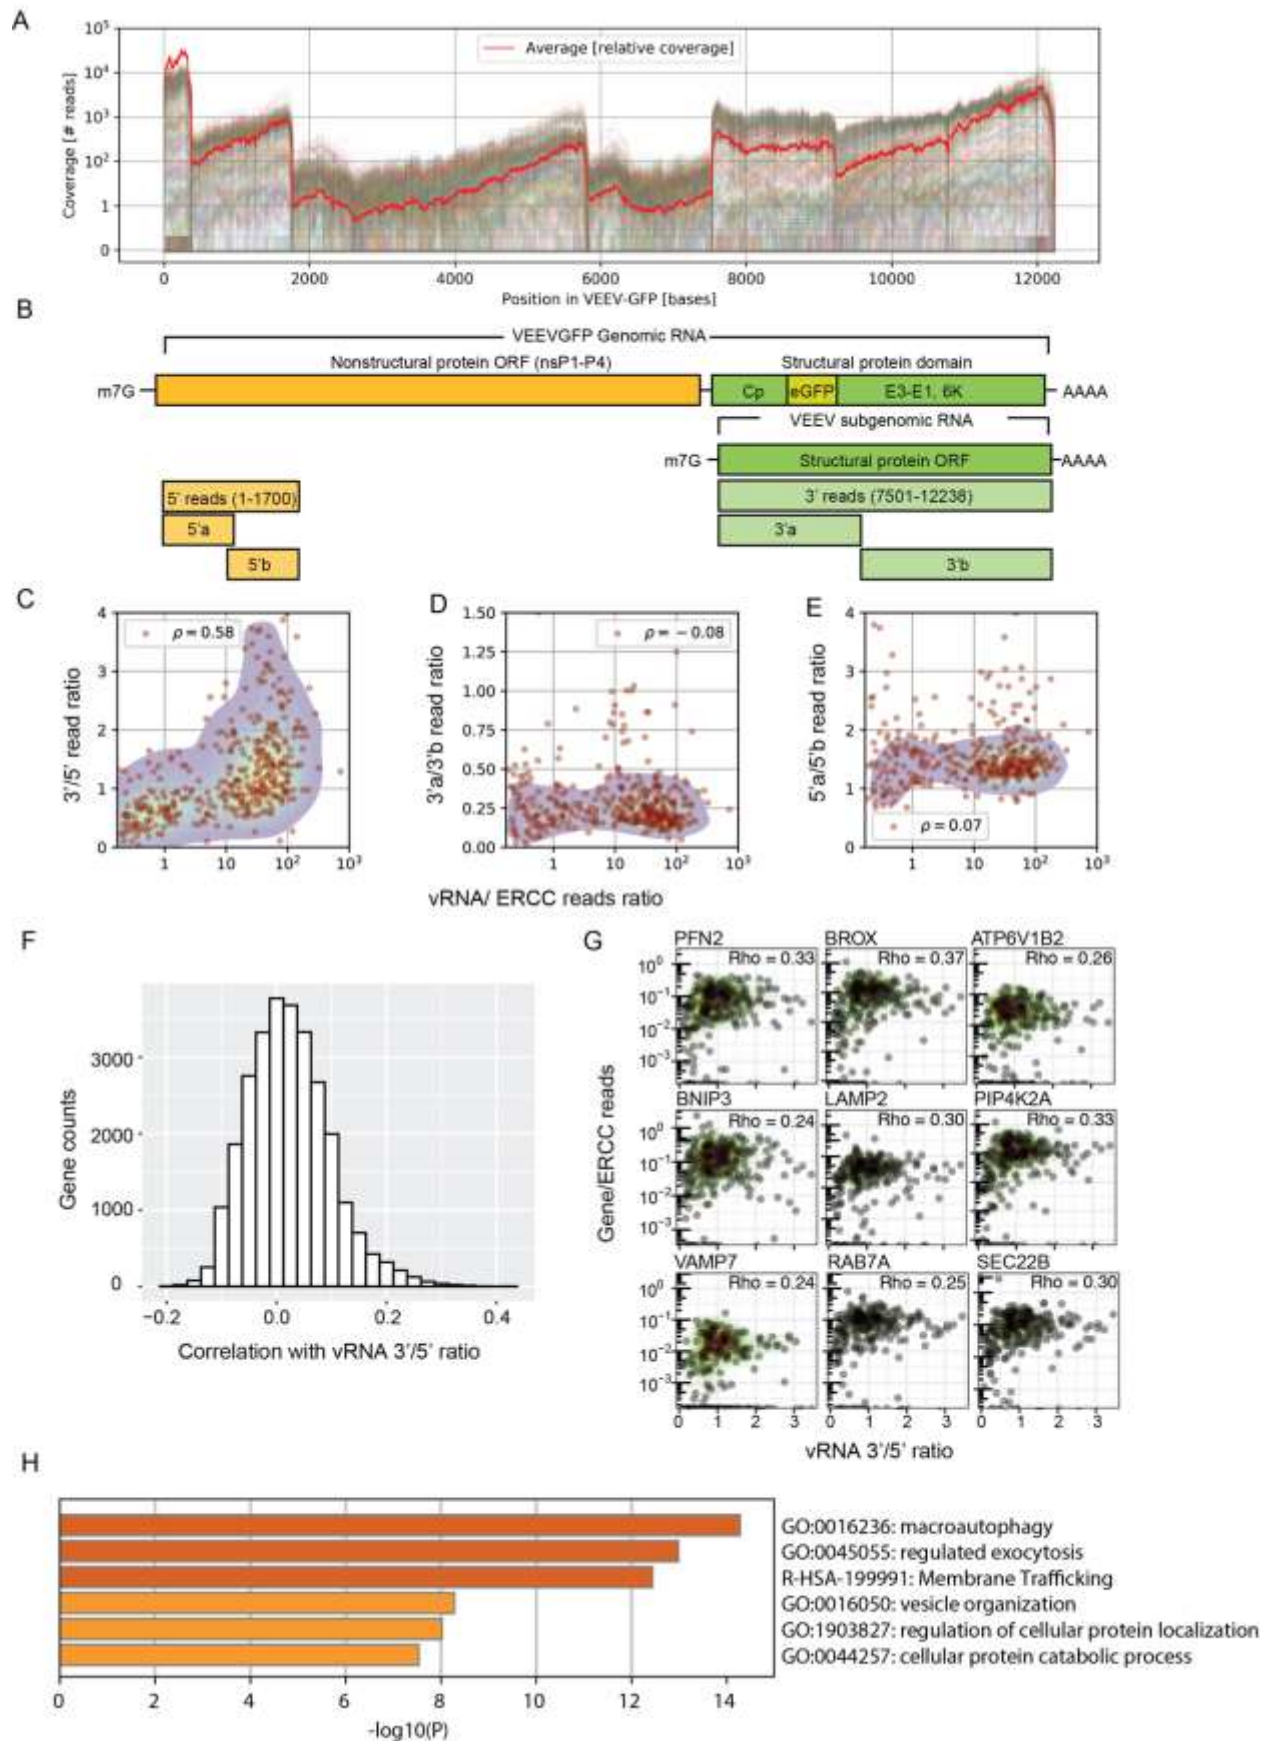

1134 **Fig 4. The expression of genes involved in intracellular membrane trafficking correlates**  
1135 **with the ratio of 3' to 5' vRNA reads.** (A) Coverage of viral reads over the entire VEEV-TC-  
1136 83 genome. Each line is a cell, and the red line is a scaled average across all cells. (B) Genome  
1137 architecture of VEEV highlighting the nonstructural (yellow) and structural (green) protein  
1138 domains. (C) Scatter plot showing positive correlation of VEEV 3'/5' read ratio with cellular  
1139 vRNA abundance. Each dot is an infected cell. (D-E) Scatter plots showing no correlation  
1140 between the 3'a/3'b read ratio (D) and 5'a/5'b read ratio (E) and cellular vRNA abundance. (F)  
1141 Histogram of Spearman's correlation coefficients between all host genes and the 3'/5' read ratio.  
1142 (G) Representative scatter plots of host gene expression versus vRNA 3'/5' read ratio and  
1143 corresponding Rho Spearman's correlation coefficients. Each dot is a cell and contour plots  
1144 indicate cell density (low to high, green to red). (H) Gene enrichment analysis of top 300 genes  
1145 positively correlated with the 3'/5' read ratio. ORF, opening reading frame; PFN2, Profilin 2;  
1146 BROX, BRO1 Domain- And CAAX Motif-Containing Protein; ATP6V1B2, ATPase H<sup>+</sup>  
1147 Transporting V1 Subunit B2; BNIP3, BCL2 Interacting Protein 3; LAMP2, Lysosomal  
1148 Associated Membrane Protein 2; PIP4K2A, Phosphatidylinositol-5-Phosphate 4-Kinase Type 2  
1149 Alpha; VAMP7, Vesicle Associated Membrane Protein 7; RAB7A, Ras-Related Protein Rab-7a;  
1150 SEC22B, SEC22 Homolog B.

1151  
1152  
1153  
1154  
1155

A

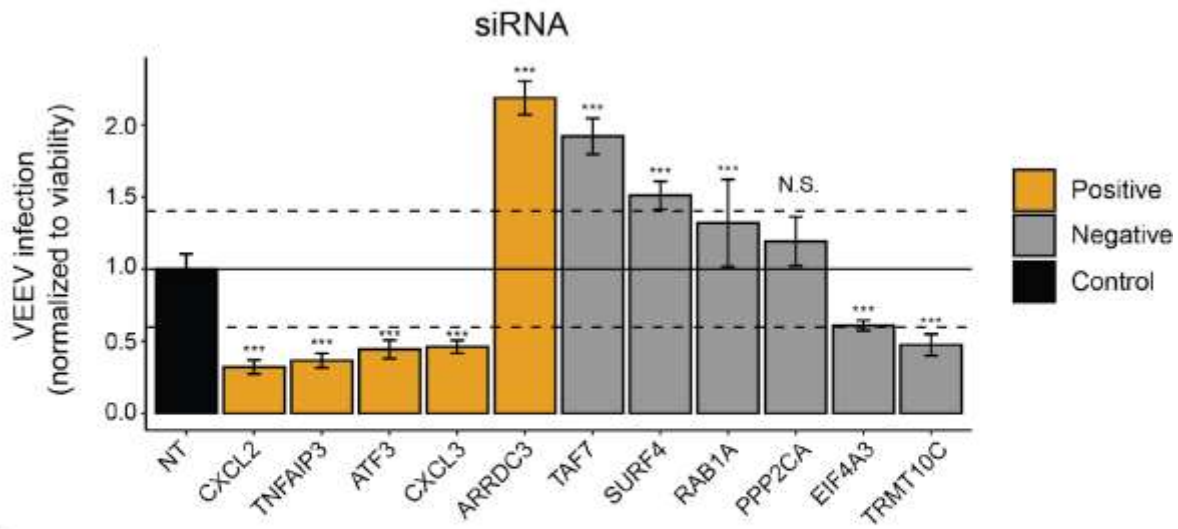

B

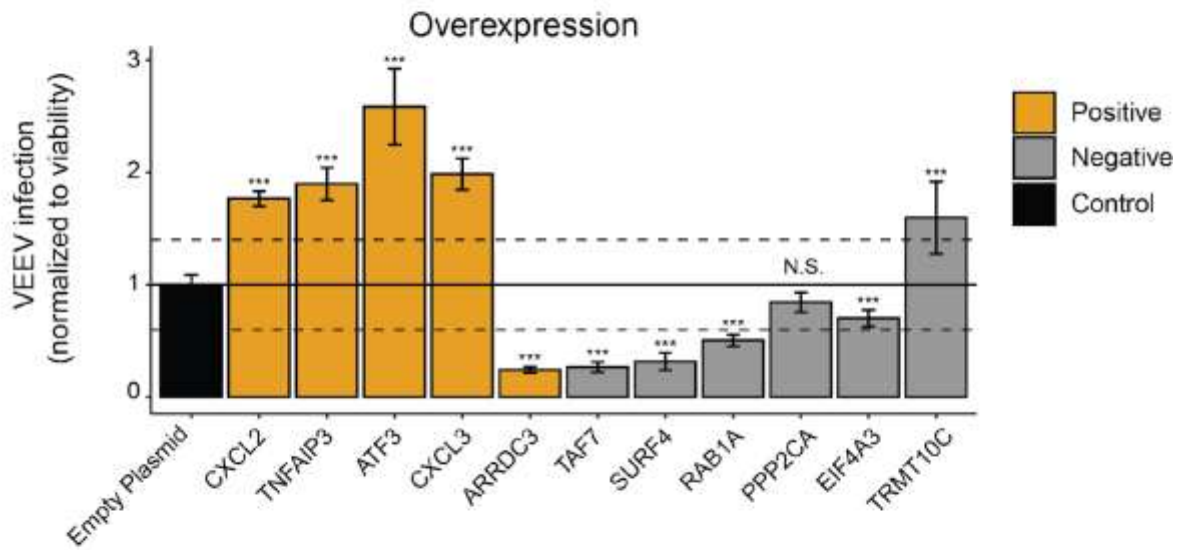

C

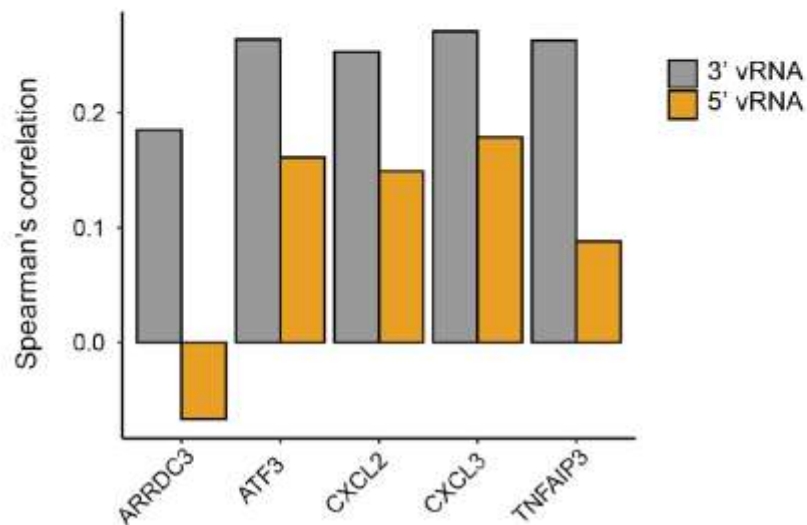

1157 **Fig 5. Validation of candidate VEEV-TC-83 proviral and antiviral genes.** VEEV-TC-83  
1158 infection relative to non-targeting (NT) siRNA (A) or empty plasmid (B) controls following  
1159 siRNA-mediated knockdown (A) or overexpression (B) of the indicated host factors measured by  
1160 luciferase assays at 18 hpi (MOI = 0.01) of U-87 MG cells with VEEV-TC-83-nLuc and  
1161 normalized to cell viability. Columns are color-coded based on the correlation of the respective  
1162 gene with vRNA abundance via viscRNA-Seq: orange for genes that are positively correlated  
1163 with vRNA and grey for genes that are negatively correlated with vRNA. Both data sets are  
1164 pooled from two independent experiments with six replicates each. Shown are means  $\pm$  SD; \* $p <$   
1165 0.05, \*\* $p <$  0.01, \*\*\* $p <$  0.001 relative to the respective control by 1-way ANOVA followed by  
1166 Dunnett's post hoc test. The dotted lines represent the cutoffs for positivity. Confirmation of  
1167 altered level of expression and cellular viability measurements are shown in S4 Fig. (C)  
1168 Correlation coefficients between proviral candidates with the 3' (grey) and 5' (orange) vRNA  
1169 reads.

1170

1171



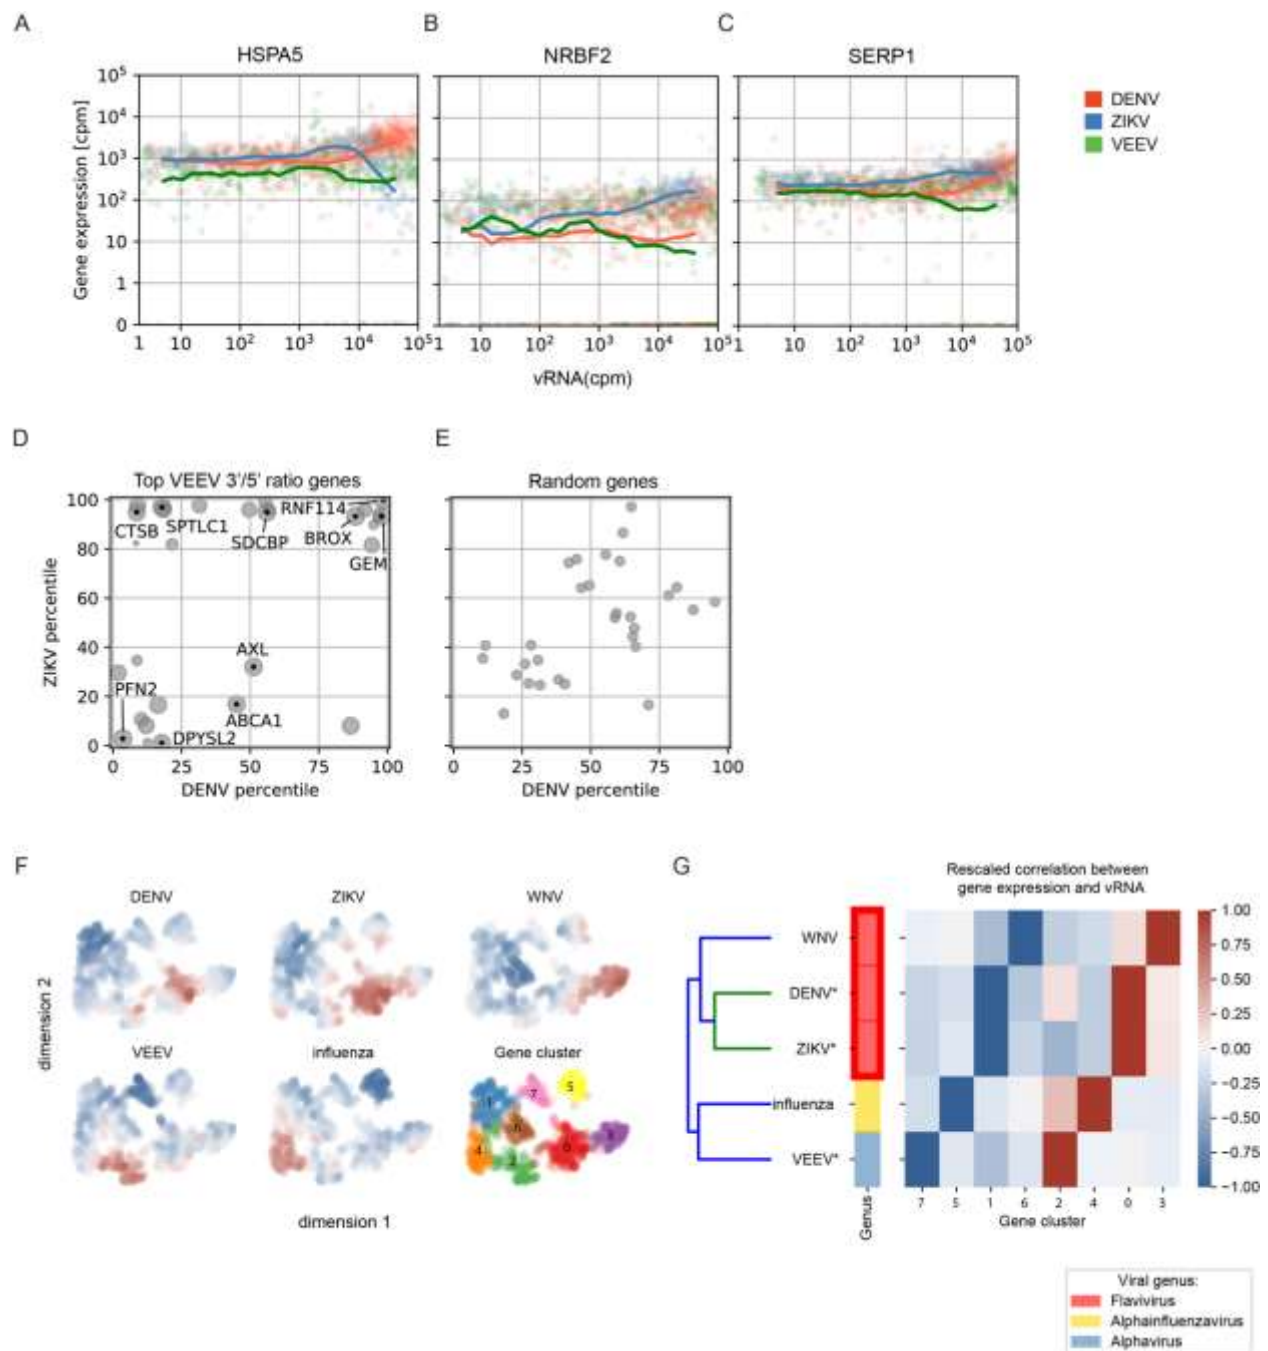

1172

1173

1174

1175 **Fig 6. Comparative viscRNA-Seq analysis across five RNA viruses.** (A-C) Scatter plots of  
1176 representative host gene expression versus vRNA in single cells during DENV (orange), ZIKV  
1177 (blue), and VEEV-TC-83 (green) infection. Dots indicate single cells, lines are running averages  
1178 at increasing vRNA abundances. (D, E) Correlation between host gene expression and vRNA  
1179 abundance during DENV versus ZIKV infection of the top genes that positively correlate with  
1180 the VEEV 3'/5' read ratio (D) or a similar number of random genes (E). Each dot is a gene and  
1181 the axis coordinate is the percentage of genes with a correlation with vRNA smaller than the  
1182 gene of interest. For (D), size of the dot increases with the correlation with VEEV 3'/5' read  
1183 ratio (top correlated gene is the largest). (F) UMAP (56) embedding of the correlations of host  
1184 genes with vRNA during infection by 5 individual RNA viruses. Blue and red indicate  
1185 downregulation and upregulation during each infection, respectively. Several clusters of genes  
1186 are observed (0-7). (G) Hierarchical clustering of host gene clusters highlighting that gene  
1187 upregulation is mostly virus-specific and is consistent with the known phylogeny. cpm, count per  
1188 million; WNV, West Nile virus; IAV, influenza A virus.

1189  
1190  
1191  
1192  
1193  
1194  
1195  
1196  
1197  
1198  
1199  
1200  
1201  
1202  
1203  
1204  
1205  
1206  
1207  
1208  
1209  
1210  
1211  
1212  
1213  
1214  
1215  
1216  
1217  
1218  
1219  
1220  
1221  
1222

1223 **Supporting Information**

1224

1225 **S1 Text.** Rare structural viral read variants correlate with expression of specific host genes.

1226 **S1 Fig.** Quality control and definition of infected cells.

1227 **S2 Fig.** Subgrouping cells based on viral load, representative differentially expressed genes

1228 (DGEs) and correlation analysis.

1229 **S3 Fig.** VEEV gap reads identified via viscRNA-Seq.

1230 **S4 Fig.** Loss-of-function and gain-of-function experiments for validation of candidate proviral

1231 and antiviral factors.

1232 **S5 Fig.** Functional relevance of viscRNA-seq hits in cells infected with wild type TC-83 and

1233 TrD VEEV.

1234 **S6 Fig.** Pathway analysis for genes that positively correlated with VEEV 3'/5' read ratio and

1235 positively (A) or negatively (B) correlated with DENV and ZIKV.

1236 **S1 Table.** VEEV capture oligonucleotides.

1237 **S2 Table.** siRNA sequence of candidate genes.

1238 **S3 Table.** qRT-PCR primer sequences.

1239

1240
