1 **The transcriptional landscape of Venezuelan equine encephalitis virus infection**

2

3 Zhiyuan Yao<sup>1, 2,\*</sup>, Fabio Zanini<sup>3,4,\*</sup>, Sathish Kumar<sup>1, 2</sup>, Nuttada Panpradist<sup>1,2,3,5</sup>, Avery Muniz<sup>1, 2</sup>,

4 Stephen R. Quake<sup>3,6,7</sup>, and Shirit Einav<sup>1, 2</sup>,

5

6 \*: these authors contributed equally

7

8 <sup>1</sup>Department of Microbiology and Immunology, Stanford University School of Medicine,

9 Stanford, CA

10 <sup>2</sup>Division of Infectious Diseases and Geographic Medicine, Department of Medicine, Stanford

11 University School of Medicine, Stanford, CA, USA

12 <sup>3</sup>Department of Bioengineering, Stanford University, Stanford, CA, USA

13 <sup>4</sup>Lowy Cancer Research Centre, University of New South Wales, Sydney, Australia

14 <sup>5</sup>Department of Bioengineering, University of Washington, Seattle, WA, USA

15 <sup>6</sup>Chan Zuckerberg Biohub, San Francisco, CA, USA

16 <sup>7</sup>Department of Applied Physics, Stanford University, Stanford, CA, USA

17

18 Corresponding authors: Fabio Zanini ([fabio.zanini@unsw.edu.au](mailto:fabio.zanini@unsw.edu.au)) and Shirit Einav (email:

19 [seinav@stanford.edu](mailto:seinav@stanford.edu)).

20

21

22

23

24

25

26 **Abstract**

27 No vaccines or antivirals are approved against Venezuelan equine encephalitis virus (VEEV)  
28 infection in humans. To improve our understanding of VEEV-host interactions, we  
29 simultaneously profiled host transcriptome and viral RNA (vRNA) in thousands of single cells  
30 during infection of human astrocytes. Host transcription was suppressed, and “superproducer  
31 cells” with extreme vRNA abundance and altered transcriptome emerged during the first viral life  
32 cycle. Cells with increased structural-to-nonstructural transcript ratio demonstrated upregulation  
33 of trafficking genes at later time points. Loss- and gain-of-function experiments confirmed pro-  
34 and antiviral host factors. Single-cell deep sequencing analysis identified a viral E3 protein  
35 mutation altering host gene expression. Lastly, comparison with data from other viruses  
36 highlighted common and unique pathways perturbed by infection across evolutionary scales.  
37 This study provides a high-resolution characterization of the cellular response to VEEV  
38 infection, identifies candidate targets for antivirals, and establishes a comparative single-cell  
39 approach to study the evolution of virus-host interactions.

40

41

42

43

44

45

46

47

## 48 **Introduction**

49 For more than a century, Venezuelan Equine Encephalitis Virus (VEEV), a member of the  
50 *Alphavirus* genus, has been the causative agent of outbreaks of febrile neurological disease in  
51 both animals and humans in Central and South America (Sharma and Knollmann-Ritschel 2019;  
52 Aguilar et al. 2011). The incidence of VEEV infection is underestimated since early symptoms  
53 are non-specific (Aguilar et al. 2011). While typically transmitted via a mosquito bite, VEEV is  
54 also infectious as an aerosol, hence it is considered a major bioterrorism threat (Hawley and  
55 Eitzen 2001). To date, no US FDA approved drugs or vaccines against VEEV are available. A  
56 deeper understanding of VEEV biology in human cells is required to advance the development  
57 of effective countermeasures against VEEV.

58  
59 Because VEEV is a biosafety level 3 pathogen, TC-83, a live-attenuated vaccine strain, is  
60 commonly used for research purposes (Berge et al. 1961). Although attenuated, VEEV TC-83  
61 replicates rapidly: viral protein production is observed as early as 6 hours postinfection (hpi) of  
62 human astrocytoma cells (U-87 MG) at multiplicity of infection (MOI) of 2, and over  $10^{10}$  copies  
63 of intracellular viral RNA (vRNA) can be detected by 24 hpi (Keck et al. 2018). It remains  
64 unknown, however, whether a large number of cells, each producing a small number of virions,  
65 or a few “superproducer” cells drive this effective virus production. Productive replication is  
66 associated with profound shutdown of host gene transcription (Garmashova, Atasheva, et al.  
67 2007), however, since the virus relies on cellular machineries, it is important to understand what  
68 host factors are “spared” from complete shutdown and needed for virus production.

69  
70 The genome of VEEV is an ~11.5 kb single-stranded positive-sense RNA. The genomic RNA  
71 contains two domains. The 5' two-thirds of the genome constitutes the first open reading frame  
72 (ORF), which encodes the nonstructural (ns) proteins required for viral RNA synthesis (nsP1-4).  
73 The 3' one-third of the genome is the structural protein domain. The structural proteins (capsid,  
74 envelope glycoproteins E1-3, 6k, and transframe (TF) protein) are translated from a second

75 ORF that is expressed through the production of a subgenomic mRNA from an internal  
76 promoter in the negative-strand RNA replication intermediate and function in the assembly of  
77 new virions and their attachment and entry into cells (Strauss and Strauss 1994). While the  
78 stoichiometry of the genomic and subgenomic transcripts in the setting of VEEV infection has  
79 not been characterized, the transcription of the subgenomic RNA of a related alphavirus,  
80 Sindbis virus (SINV), was shown to be ~3-fold higher than the genomic RNA during late stages  
81 of the viral life cycle (Shirako and Strauss 1990; Lemm et al. 1994), supporting a switch towards  
82 increased synthesis of structural proteins required for virion formation over nonstructural  
83 proteins required primarily for viral RNA replication (Raju and Huang 1991; Levis, Schlesinger,  
84 and Huang 1990).

85  
86 The understanding of the alphavirus life cycle is largely based on studies conducted with the  
87 non-pathogenic SINV and Semliki forest virus (SFV). Alphaviruses enter their target cells via  
88 clathrin-mediated endocytosis and release their nucleocapsid into the cytoplasm via fusion with  
89 endosomal membranes, followed by translation and processing of the nonstructural polyprotein  
90 (Kielian, Chanel-Vos, and Liao 2010). Viral RNA replication occurs within membrane  
91 invaginations called spherules that are thought to be derived from the plasma membrane,  
92 endoplasmic reticulum and late endosomes and are subsequently incorporated into type 1  
93 cytopathic vacuoles (CPV)-I composed of modified endosomes and lysosomes (Spuul et al.  
94 2010; Grimley, Berezesky, and Friedman 1968; Kujala et al. 2001; Garoff et al. 1994).  
95 Production of genomic RNA and subsequently subgenomic RNA are followed by polyprotein  
96 translation and processing. The current model of infectious alphavirus production suggests that  
97 the genomic RNA is packaged by the capsid in the cytoplasm and that the viral glycoproteins  
98 traffic via membrane structures, presumed to be *trans*Golgi-derived (CPV-II), to budding sites on  
99 the plasma membrane, followed by membrane curving and scission facilitating envelopment of  
100 the nucleocapsid (Garoff et al. 1994; Griffiths, Quinn, and Warren 1983; Soonsawad et al.  
101 2010).

102

103 Although VEEV is predicted to extensively interact with cellular factors to effectively replicate  
104 and evade cellular immune responses, like other small RNA viruses, little is known about these  
105 interactions. A recent small interfering RNA (siRNA) screen revealed a requirement for actin-  
106 remodeling pathway proteins including ARF1, RAC1, PIP5K1- $\alpha$ , and ARP3 in VEEV infection  
107 and specifically in promoting viral glycoprotein transport to the plasma membrane (Radoshitzky  
108 et al. 2016). Various other cellular factors, such as DDX-1 and -3 (Amaya et al. 2016), have  
109 been reported to have proviral functions, whereas IFITM3 (Gupta et al. 2017) and members of  
110 the PARP protein family (Atasheva et al. 2012), were shown to be antiviral factors.  
111 Nevertheless, to the best of our knowledge, the interplay between VEEV and the human host  
112 has not been studied to date via an unbiased, genome-wide approach.

113

114 Single cell RNA sequencing (scRNA-Seq) has demonstrated utility for understanding the  
115 heterogeneity of both viral and cellular transcriptome dynamics at a high resolution. We have  
116 recently developed virus-inclusive single-cell RNA-Seq (viscRNA-Seq), an approach to  
117 simultaneously profile host and viral gene expression in thousands of single cells (Zanini, Pu, et  
118 al. 2018). The studies we and others have conducted in cell lines infected with dengue (DENV),  
119 Zika (ZIKV), influenza A (IAV) (Russell, Trapnell, and Bloom 2018; Russell et al. 2019) and  
120 West Nile (WNV) viruses (O'Neal et al. 2019) and our results in samples from DENV-infected  
121 patients (Zanini, Robinson, et al. 2018) revealed a tremendous cell-to-cell heterogeneity in both  
122 vRNA abundance and levels of host factors that support or restrict infection. Moreover, we have  
123 demonstrated the utility of this approach in identifying novel cellular factors that support or  
124 restrict viral infection (Zanini, Pu, et al. 2018). We have therefore hypothesized that studying  
125 VEEV transcriptome dynamics at a single cell resolution may overcome challenges related to  
126 the high viral replication rate, thereby highlighting specific transcriptomic signatures above the  
127 suppressed transcriptional landscape and identifying novel cellular factors that support or  
128 restrict VEEV replication.

129

130 We conducted a longitudinal study of virus-host cell interactions across 24 hours of VEEV  
131 infection in U-87 MG cells via viscRNA-Seq. We detected extreme heterogeneity in vRNA  
132 abundance and host transcriptome across cells from the same culture. To overcome the  
133 challenge presented by this uneven and rapid viral replication, we stratified cell populations  
134 based on vRNA abundance rather than time postinfection and correlated cellular gene  
135 expression with both (i) total vRNA and (ii) the ratio of total (genomic + subgenomic) to genomic  
136 vRNA. These approaches enabled identification of genes whose expression is altered during  
137 VEEV infection, many of which were then confirmed via loss-of-function and gain-of-function  
138 experiments to have pro- and antiviral roles, respectively. Moreover, we revealed a small  
139 population of “superproducer cells” that drives the rapid increase in vRNA in the first replication  
140 cycle and a cell population that harbors excess of the structural over nonstructural viral ORFs at  
141 late stages of viral infection, both associated with distinct host gene expression patterns. We  
142 identified single nucleotide polymorphisms (SNPs) that are correlated with a specific host  
143 response and structural variants within the VEEV genome. Lastly, comparison of the VEEV  
144 dataset with published data on other RNA viruses revealed unique and overlapping host gene  
145 responses across viral clades, highlighting the utility of comparative single-cell transcriptomics.

## 146 **Results**

### 147 **viscRNA-Seq reveals cell-to-cell heterogeneity in VEEV and host gene expression.**

148 To characterize the relation between viral and host cell transcriptional dynamics over the course  
149 of VEEV infection, human astrocytoma cells (U-87 MG) (PontÉN and Macintyre 1968) were  
150 infected with VEEV (TC-83, attenuated vaccine strain) conjugated to GFP (Sun et al. 2014) at  
151 MOIs of 0.1 and 1 or mock infected and harvested at six time points: 0.5, 1.5, 4, 6, 12, and 24  
152 hpi (**Figure 1A**). Single cells were then isolated and processed by viscRNA-Seq, as described  
153 previously (Zanini, Pu, et al. 2018). Since the VEEV RNA is polyadenylated, it can be captured  
154 by the standard poly-T oligonucleotide that hybridizes with host transcripts. Nevertheless, to

155 improve vRNA capture and ensure coverage at the 5' end of the viral genome, two specific viral  
156 capture oligonucleotides, at positions 352 and 1,742 of the VEEV genome, were added to the  
157 reaction (see Methods). In total, 4608 cells were processed, of which 2301 cells were  
158 sequenced with approximately 1 million reads/cell (**Figure S1A**). 2004 cells passed quality  
159 controls and were analyzed (see Methods).

160

161 The fraction of VEEV-infected cells, defined by the presence of 10 or more viral reads,  
162 increased with both time and MOI and saturated at 12 and 24 hpi with MOI 1 and 0.1,  
163 respectively (**Figure 1B and Figure S1B**). A rapid increase in the ratio of viral/total reads was  
164 observed within single cells over time (**Figure 1C**). Starting at 6 hpi, the duration of a single  
165 cycle of VEEV replication (Jose, Taylor, and Kuhn 2017; Strauss and Strauss 1994), a fraction  
166 of the cells (5% at 6 hours and 32% at 12 hours in cells infected with MOI 0.1 and 1,  
167 respectively) contained a large number of vRNA reads (up to 10% of the total reads), indicating  
168 that once initiated, viral replication proceeded extremely fast in these “superproducer” cells  
169 (**Figure 1C**). At later time points, particularly 24 hpi, the increase in vRNA reads was associated  
170 with a decline in cellular transcripts. The normalized cellular mRNA reads (calculated by dividing  
171 the absolute number of reads by the sum of External RNA Controls Consortium (ERCC) spike-in  
172 reads) declined in infected cells (**Figure 1D**), but not in uninfected bystander cells derived from  
173 the infected samples (**Figure 1E**) or in mock-infected control cells (**Figure S1C**). To avoid an  
174 artificial decline in host gene reads in cells with high vRNA abundance, rather than normalizing  
175 host gene reads by the total reads, we normalized by ERCC reads for most downstream  
176 analyses: this transformation is akin to an estimate of the actual number of mRNA molecules for  
177 each gene (up to a constant factor).

178

179 The distributions of viral/total reads at 6 and 12 hpi suggested that infected cells can be roughly  
180 divided into two populations based on vRNA abundance with a cutoff of 0.001 virus/total reads  
181 (**Figure 1C and Figure S1D**). Independently, dimensionality reduction followed by unsupervised

182 Louvain clustering (Blondel et al. 2008) performed on the combined host gene expression data  
183 in infected cells harvested at all time points (ignoring vRNA abundance) also revealed two cell  
184 populations, albeit with a partial overlap (**Figure 1F**). Notably, cluster 1 was enriched for cells  
185 with high vRNA abundance, whereas cluster 0 included mostly cells with low vRNA abundance,  
186 largely overlapping with the two cell populations defined by the cutoff of 0.001 virus/total reads  
187 in the distribution analysis (**Figure 1G**). These results confirm that a cutoff of 0.001 virus/total  
188 reads can effectively divide infected cells into two, potentially functionally different, populations  
189 and support its use over time postinfection as a grouping strategy for differential gene  
190 expression analysis.

191

192 **Altered expression of host factors and pathways during VEEV infection.** To identify host  
193 genes whose expression is altered during VEEV infection, we integrated differential gene  
194 expression and correlation analyses. First, we combined cells harvested at different time points  
195 and divided them into three groups based on the cutoff defined above: infected cells with high  
196 vRNA ( $>0.001$  virus/total reads), infected cells with low vRNA ( $<0.001$  virus/total reads), and  
197 mock-infected controls. Computing differential expression at the distribution level (Mann-  
198 Whitney U test) revealed 4608 and 548 host genes whose expression level significantly differed  
199 between the high or low vRNA groups versus the mock-infected controls, respectively. We  
200 predicted that differential expression of some genes might be related to batch effect resulting  
201 from differences in incubation time rather than from viral infection. To control for such  
202 confounders, we calculated Pearson correlation coefficients between gene expression and time  
203 postinfection. We then used two-dimensional scatterplots to visualize the distribution of these  
204 correlation coefficients for each gene in the infected group (with high or low vRNA) versus the  
205 mock-infected group (**Figure S2A**). Genes demonstrating greater than 2-fold difference  
206 between infected and mock-infected cells were considered differentially expressed genes  
207 (DEGs), whereas genes whose expression was similarly altered over time between infected and  
208 mock-infected cells were thought to represent batch effect. 2559 and 144 genes passed this



209 additional filter as DEGs between the high and low vRNA groups vs. mock-infected group,  
210 respectively. The magnitude of the differences in expression levels of most DEGs was smaller  
211 ( $<0.5 \log_2$  fold change) between the low vRNA vs. mock-infected groups than between the high  
212 vRNA vs. mock-infected groups. Representative genes that were overexpressed (TNFAIP3),  
213 underexpressed (TAF3), or unaltered (RND3) in the high vRNA vs. mock-infected groups are  
214 shown in **Figure S2B**. The expression level of these genes did not change over time in mock-  
215 infected cells, supporting that the altered levels represent actual differences between the groups  
216 rather than batch effects (**Figure S2C**).

217  
218 To better understand the host gene dynamics in VEEV infection, we also computed Spearman's  
219 rank correlation coefficients between gene expression and vRNA abundance across all cells, as  
220 done previously for flaviviruses (Zanini, Pu, et al. 2018). Examples of positively correlated  
221 (TNFAIP3), negatively correlated (TAF3), and uncorrelated (RND3) genes are shown in **Figure**  
222 **1H**. Our data indicate that the majority of host genes are negatively correlated with vRNA  
223 abundance (**Figure S2D**). Stratifying host genes by expression level in mock-infected cells  
224 indicated a stronger negative correlation for highly expressed genes (**Figure S2E**), suggesting  
225 that cellular functions relying on highly expressed genes are more vulnerable to VEEV infection.  
226

227 To identify genes that are both differentially expressed between infected and uninfected cells  
228 and are correlated with vRNA (beyond TNFAIP3 and TAF3), we computed the intersection  
229 between the 2559 DEGs with the top 600 genes that positively ( $n=300$ ) or negatively ( $n=300$ )  
230 correlated with vRNA. 206 overlapping genes emerged from this analysis, of which 5 were  
231 positively correlated and 201 were negatively correlated with vRNA. Gene Ontology (GO)  
232 enrichment analysis of these 206 genes via metascape (Zhou et al. 2019) highlighted negative  
233 regulation of intracellular signal transduction as the most enriched molecular function term  
234 (**Figure 1I**).

235

236 **Early infected “superproducer” cells show distinct patterns of host gene expression.** To  
237 elucidate whether the “superproducer” cells (harboring > 0.001 vRNA/total reads at 6 hpi,  
238 **Figure 1C**) exhibit a distinct gene expression pattern, we conducted differential gene  
239 expression analysis between these 13 cells (5% of total cell population at 6 hpi) and an equal  
240 number of bystander cells harboring no vRNA reads derived from the same culture at the same  
241 time point. A total of 32 DEGs were identified, with representative overexpressed and  
242 underexpressed genes shown in **Figure 1J**. Among the overexpressed genes are MEIS2, a  
243 master transcriptional regulator, WWP1, an E3 Ubiquitin ligase involved in membrane  
244 trafficking, and ADAMTS6, a disintegrin and metalloproteinase involved in epithelial cell-cell  
245 junctions and O-linked glycosylation of proteins. Among the underexpressed genes are ZMAT5,  
246 an RNA-binding protein belonging to the CCCH zinc finger family of proteins implicated in  
247 antiviral immune regulation (Fu and Blackshear 2017), and PARP1, which is a poly(ADP-ribosyl)  
248 transferase related to PARP7, 10 and 12, previously shown to have antiviral functions in VEEV  
249 infection (Atasheva, Frolova, and Frolov 2014; Atasheva et al. 2012). These findings provide  
250 evidence that a small subset of “superproducer” cells largely drives VEEV replication during the  
251 first viral life cycle and demonstrates a distinct gene expression pattern. These results also point  
252 to MEIS2, WWP1, and ADAMTS6 as candidate proviral factors, and to ZMAT5 and PARP1 as  
253 potential antiviral factors.

254

255 **The expression of genes involved in intracellular membrane trafficking correlates with**  
256 **the ratio of 3’ to 5’ vRNA reads.** By including both a poly-T and a 5’-end specific capture  
257 oligonucleotides in the viscRNA-Seq, good read coverage at both ends of the VEEV genome  
258 was obtained (**Figure 2A**). We defined 5’ RNA reads as those corresponding to the first 1,700  
259 bases (encoding nonstructural proteins) and thus derived from the genomic vRNA only, and 3’  
260 RNA reads as those corresponding to the last third of the genome (encoding structural  
261 proteins), derived from both the genomic and subgenomic vRNAs (**Figure 2B**). The  
262 stoichiometry of the 3’ and 5’ RNAs was highly heterogeneous between cells. While at early

263 stages of infection the 3' to 5' (structural to nonstructural) vRNA read ratio (3'/5' read ratio), as  
264 defined by these genomic regions, was below or around 1, at late stages, it reached up to 4 and  
265 was correlated with total vRNA abundance (**Figure 2C**). In contrast, the read ratio between two  
266 segments we selected as internal controls at the 5' end of the vRNA (5'a/5'b read ratio) and  
267 between two segments at the 3' end (3'a/3'b read ratio) did not correlate with the cellular vRNA  
268 abundance (**Figures 2D-E**). To test the hypothesis that differences in vRNA stoichiometry are  
269 associated with distinct host responses, we measured the Spearman correlation coefficients of  
270 all host genes with the 3'/5' read ratio in the same cell. The resulting histogram distribution  
271 curve revealed a long tail of host genes whose expression increased with the 3'/5' read ratio  
272 (**Figure 2F**), in contrast to the distribution of host genes in correlation with the total vRNA reads  
273 (**Figure S2D**). Positively correlated genes were mostly involved in various aspects of  
274 intracellular trafficking and included factors previously reported to be required for VEEV infection  
275 via an siRNA screen including ARP3 (Radoshitzky et al. 2016), RAC2, a paralog of RAC1  
276 (Radoshitzky et al. 2016), and DDX5, a member of the DEAD box family of RNA  
277 helicases (Amaya et al. 2016). Novel factors among the positively correlated genes included  
278 factors involved in late endosomal trafficking (RAB7A (Verhoeven et al. 2003), the accessory  
279 ESCRT factor (BROX) (Mu et al. 2012), and the SNARE protein VAMP7 (Pryor et al. 2008)), ER  
280 to Golgi trafficking (SEC22B) (Zhang et al. 1999), regulation of secretion (PIP4K2A) (Rozenvayn  
281 and Flaumenhaft 2003), lysosome function and autophagy (LAMP2) (Hubert et al. 2016), actin  
282 polymerization (PFN2) (Honoré et al. 1993), and acidification of intracellular organelles for  
283 protein sorting (ATP6V1B2) (Bernasconi et al. 1990) (**Figure 2G**). Accordingly, pathway  
284 analysis on the top 300 correlated genes identified macroautophagy, membrane trafficking,  
285 vesicle organization, exosomal secretion, and regulated exocytosis as the highly enriched  
286 functions (**Figure 2H**). Notably, these genes were only positively correlated with the 3'/5' read  
287 vRNA ratio and not with the total vRNA reads. These findings indicate that the late stages of  
288 VEEV infection are characterized by heterogeneous stoichiometry of structural (3') and  
289 nonstructural (5') vRNAs and upregulation of intracellular trafficking pathways previously

290 implicated in assembly and egress of various RNA viruses in cells with an excess of structural  
291 vRNA. Moreover, these results highlight the unique opportunity to discover candidate proviral  
292 factors for VEEV infection by correlating gene expression with specific viral genome  
293 stoichiometry via viscRNA-Seq.

294

295 **Validation of candidate proviral and antiviral factors.** Next, we probed the functional  
296 relevance of 24 genes that either strongly or moderately correlated with vRNA abundance to  
297 viral infection. We first conducted loss-of-function screens by measuring the effect of siRNA-  
298 mediated depletion of the 24 individual genes on VEEV infection and cellular viability in U-87  
299 MG cells (**Figures 3A and S3**). Depletion of 4 and 10 genes suppressed or increased VEEV  
300 infection by more than 40%, respectively, as measured by luciferase assays 18 hpi with a nano-  
301 luciferase reporter TC-83 virus and normalized to cellular viability in two independent screens.  
302 Depletion of CXCL3, ATF3, TNFAIP3, and CXCL2, four out of five genes tested that positively  
303 correlated with vRNA abundance via viscRNA-Seq (orange bars), reduced VEEV infection,  
304 suggesting that they are proviral factors. In contrast, depletion of 10 of 19 genes tested that  
305 negatively correlated with vRNA (grey bars) enhanced infection, suggesting that these proteins  
306 may function as antiviral factors. Suppression of four underexpressed genes demonstrated no  
307 effect on VEEV infection, suggesting that they were either non-essential or not restricting  
308 (possibly due to redundancy in host factors requirement) or that the level of knockdown was  
309 insufficient to trigger a phenotype.

310

311 Next, we conducted gain-of-function screens by ectopically expressing the 24 individual  
312 gene products in U-87 MG cells followed by VEEV infection (**Figure 3B**). Using a cutoff of  
313 greater than 40% change in viral infection normalized to cell viability in two independent  
314 screens, overexpression of most genes resulted in an inverse effect to that observed with the  
315 siRNA, i.e. if knockdown inhibited viral infection, overexpression enhanced it and vice versa.  
316 Overexpression of CXCL3, ATF3, TNFAIP3 and CXCL2 increased VEEV infection, indicating

317 rate limitation associated with these candidate proviral factors. In contrast, overexpression of  
318 the majority of the anticorrelated gene products reduced VEEV infection, consistent with an  
319 antiviral phenotype.

320

321 While the transcriptional level of EIF4A3, SRSF1, TRMT10C, PSMD14 and PSMC5  
322 anticorrelated with vRNA abundance, their gene products demonstrated a proviral phenotype.  
323 This may either result from regulation of these genes at the translational level or from  
324 downstream effects of these multifunctional genes. ARRDC3, a member of the arrestin family  
325 (Qi et al. 2014), was positively correlated with vRNA abundance, yet its depletion increased  
326 infection and its overexpression decreased infection, in contrast with the other four positively  
327 correlated genes tested. To probe this discrepancy, we measured the correlation of ARRDC3  
328 expression with the 5' and 3' vRNA reads separately. Notably, ARRDC3 reads positively  
329 correlated with the 3' vRNA reads but negatively correlated with the 5' vRNA reads. In contrast,  
330 the other four proviral candidates positively correlated with both the 5' and 3' vRNA reads  
331 (**Figure S3C**). This finding suggests that ARRDC3 might have a dual function during VEEV  
332 infection. These findings highlight the utility of viscRNA-Seq in identifying candidate proviral and  
333 antiviral factors.

334

335 **Viral polymorphisms and rare structural viral read variants correlate with expression of**  
336 **specific host genes.** The high coverage corresponding to almost the entire viral genome  
337 obtained via viscRNA-Seq enabled computation of the frequencies of SNPs at all sites within  
338 single cells. We identified one position with high variance in SNP frequency across cells, site  
339 9227 (**Figure 4A**), where a G > A nonsynonymous change caused a substitution from Alanine  
340 to Threonine in the E3 protein. To determine whether the presence of this mutation in the viral  
341 genome is associated with an altered expression of host genes, we correlated the frequency of  
342 the 9227A allele with host gene expression. We identified several genes including BROX,  
343 TMED and SRSF6 that negatively correlated with the frequency of this mutation (**Figure 4B**).

344 Only weak positive correlation was calculated between the frequency of the 9227A allele and  
345 vRNA abundance within the same cell, suggesting that this mutation was not under positive  
346 selection within the viral pool infecting the cell culture.

347

348 Additionally, among millions of viral reads detected, we observed 14,956 gap reads (~0.1% of  
349 total viral reads), defined by having a deletion within read 1 or read 2 (we used Illumina paired-  
350 end sequencing, see Methods), not including reads with gaps between the two reads (**Figure**  
351 **S4A**). These gap reads were present in 271 cells and their abundance strongly correlated with  
352 vRNA abundance in the same cells, indicating that deep viral coverage was required for  
353 detection (**Figure S4B**). The length of these gaps ranged from 20 to over 10,000 nucleotides,  
354 with the majority being shorter than 1000 nucleotides (**Figure S4C**). The most common was a  
355 36-base gap located within the coding region of the 6K protein (black arrow in Figure S4A). This  
356 gap was found in a total of 1,226 reads derived from 55 different cells. Prediction of the RNA  
357 structure via RNAfold web server(Gruber et al. 2008) revealed that in the presence of the 36-  
358 base gap, there is formation of a hairpin with a free energy of -21.23 kcal/mol, indicating a very  
359 stable structure (**Figure S4D**). Although the biological function of this hairpin is unknown, stable  
360 RNA structures play essential roles in viral replication and tropism across multiple viruses.  
361 Alternatively, we cannot currently exclude that this gap could be a result of polymerase errors  
362 during the library preparation.

363

364 While further studies are needed to clarify the function of the observed SNPs and gaps, these  
365 findings highlight the utility of viscRNA-Seq in studying virus evolution and structural genome  
366 variants.

367

368 **Comparative viscRNA-Seq analysis across five RNA viruses reveals distinct and**  
369 **common cellular pathways affected by viral infection.**

370 To define which elements of the host response are unique to VEEV or common across multiple  
371 viruses, we first compared the VEEV dataset with our previously published viscrRNA-Seq data  
372 on human hepatoma (Huh7) cells infected with DENV and ZIKV (Zanini, Pu, et al. 2018). Since  
373 the baseline gene expression levels in astrocytes (VEEV) are different from those in  
374 hepatocytes (DENV, ZIKV), we limited the analysis to genes that were similarly expressed  
375 (within a 10-fold change) in uninfected Huh7 and U-87 MG cells. We selected cells with greater  
376 than 2 vRNA reads per million joint (viral + host) reads and monitored how the expression of  
377 host genes changes with increasing vRNA abundance across the three infections. In all three  
378 viral infections, the majority of host genes were not correlated with vRNA abundance.  
379 Nevertheless, a number of host genes exhibited correlations with one or more viruses. Three  
380 robust patterns were identified (**Figures 5A-C**): genes, such as HSPA5, that were upregulated  
381 in DENV infection and downregulated in ZIKV and VEEV infections (**Figure 5A**); genes like  
382 NRBF2 that were upregulated only during ZIKV infection (**Figure 5B**); and genes, such as  
383 SERP1, that were downregulated only in VEEV infection (**Figure 5C**). No genes that are  
384 upregulated only in VEEV infection could be identified. Beyond these general categories, the  
385 resulting patterns of viral and host expression were, however, quite complex. To better elucidate  
386 the large differences in correlation with vRNA abundance between each virus and the other two  
387 demonstrated by these representative genes, we plotted the data using a ternary plot (**Figure**  
388 **5D**). In this plot, individual lines indicate the proportion of reads of a specific host gene at  
389 increasing vRNA abundance normalized by the sum of reads of that gene in all three  
390 experiments (each with different virus), and stars indicate cells with the highest vRNA  
391 abundance. Proximity to either the lower right (HSPA5) or top corner (NRBF2) of the triangle  
392 indicate high expression of the gene during DENV or ZIKV infection, respectively, whereas  
393 proximity to the midpoint of the ZIKV axis (SERP1) indicates reduced expression specifically  
394 during VEEV infection (**Figure 5D**).

395



396 To circumvent the masking effect of VEEV transcriptional shutdown, we then compared the  
397 genes that positively correlated with the 3'/5' VEEV RNA ratio with those positively or negatively  
398 correlating with DENV or ZIKV vRNA (**Figure 5E**). This analysis revealed genes, such as  
399 BROX, GEM, and RNF114 that are positively correlated with the respective vRNA in all three  
400 viral infections, genes, such as CTSB and SPTLC1 that are positively correlated with 3'/5' VEEV  
401 RNA and ZIKV but not DENV vRNA, and genes that are positively correlated with 3'/5' VEEV  
402 RNA but negatively correlated with DENV and ZIKV vRNA, such as PFN2 and DPYSL2. In  
403 contrast, no large correlations were observed when a comparable number of random genes  
404 were similarly analyzed (**Figure 5F**). Pathway analysis on genes that are positively correlated  
405 with both the 3'/5' VEEV RNA ratio and the two flaviviral RNAs identified ER processing,  
406 glycosylation, SELK (part of Endoplasmic-Reticulum-Associated Degradation), tRNA synthesis,  
407 protein folding, virion assembly, and intracellular transport as the highly enriched functions  
408 (**Figure S5A**). In contrast, cell cycle and apoptosis control were the most highly enriched  
409 functions in pathway analysis on genes that were positively correlated with 3'/5' VEEV RNA  
410 ratio but negatively correlated with the two flaviviral RNA (**Figure S5B**). These results provide  
411 evidence that complex temporal dynamics exist across different RNA viral infections, and  
412 highlight both common and unique cellular pathways that are altered by VEEV and flaviviruses.  
413  
414 Next, we expanded our comparative analysis by including published datasets derived from  
415 single-cell transcriptomic studies on different cell lines infected with IAV (Russell, Trapnell, and  
416 Bloom 2018) and WNV (O'Neal et al. 2019) generated via 10x Genomics and Smart-seq2,  
417 respectively. Because different cell lines were used for different viruses, we calculated the ranks  
418 of the correlation coefficients between the expression of each host gene and vRNA for each  
419 virus, restricted the selection to the top and bottom 200 genes, and normalized the results  
420 between -1 and 1 for each virus. We then calculated the network of similarities between genes.  
421 t-Distributed Stochastic Neighbor Embedding (t-SNE) (Maaten and Hinton 2008) and Leiden  
422 clustering (Traag, Waltman, and van Eck 2019) of the genes highlighted nine gene clusters with



423 different expression patterns during various viral infections (**Figure 5G**). To understand the  
424 meaning of these clusters, we performed double hierarchical clustering and observed that  
425 clusters 0, 4, 7, and 2 are upregulated, while clusters 1, 3, 8, 6, and 5 are mostly downregulated  
426 during viral infection (**Figure 5H**). The dendrogram of the five viruses was qualitatively  
427 consistent with the known phylogeny as derived from viral genomic sequences, which could  
428 indicate ancestral phenotypic signatures. While upregulation was largely virus-specific, gene  
429 downregulation was sometimes shared across many viruses, particularly in cluster 3. Pathway  
430 analysis on individual clusters revealed that cluster 3 is greatly enriched in cell cycle genes  
431 (**Figure 5I**), providing evidence that unrelated RNA viruses commonly downregulate at least  
432 part of the cell cycle machinery during replicative infection. Notably, although the list of genes  
433 that were exclusively correlated with 3'/5' VEEV read ratio was also enriched in cell cycle genes  
434 (see Figures S5B), over 80% of those genes did not overlap with cluster 3 genes, indicating that  
435 only a minority of host factors within this pathway are associated with VEEV virus production.  
436 The pathway analysis of cluster 0 confirmed previously identified pathways of ER stress and  
437 vesicle transport in flaviviral infection (**Figure S6**). The signatures obtained in other clusters  
438 were less clear and would require more sophisticated analyses to be deciphered.

439

440 Overall, our analysis indicates that although comparing single cell viral infection data across  
441 species, cell lines, and technologies still presents challenges, this approach is informative in  
442 highlighting host genes and pathways that are commonly affected across very different viral  
443 families.

444

## 445 **Discussion**

446 We and others have recently characterized the cellular response in virally infected cell lines  
447 (Zanini, Pu, et al. 2018; Russell, Trapnell, and Bloom 2018), primary cells (Gorman et al. 2018;  
448 O'Neal et al. 2019) and patient samples (Zanini, Robinson, et al. 2018) via single-cell RNA-seq

449 approaches. Moreover, we reported unique and overlapping determinants in the host response  
450 to two related flaviviruses at a single cell resolution (Zanini, Pu, et al. 2018). Nevertheless, the  
451 host transcriptomic response to infection by alphaviruses, which induces a profound  
452 transcriptional shutdown of host genes, has not been previously characterized at a single cell  
453 level, and the single-cell transcriptomic responses of unrelated viruses have not been  
454 compared. By applying viscRNA-Seq to study the temporal infection dynamics of VEEV (TC-83)  
455 in human astrocytes, we revealed large cell-to-cell heterogeneity in VEEV and host gene  
456 expression, transcriptomic signatures in distinct cell subpopulations, and candidate proviral and  
457 antiviral factors, some of which we then validated. Additionally, we established a role for  
458 viscRNA-Seq in comparative evolutionary virology by demonstrating SNPs that are correlated  
459 with a specific host response, structural variants within the VEEV genome, as well as unique  
460 and overlapping host gene responses across multiple RNA viral clades. These findings provide  
461 insights into the virus-host determinants that regulate VEEV infection and highlight the utility of  
462 virus-inclusive RNA-seq approaches and comparative single-cell transcriptomics.

463

464 A prominent feature of VEEV infection is a profound suppression of cellular transcription  
465 (Garmashova, Atasheva, et al. 2007). Nevertheless, it remained unknown whether this  
466 transcriptional shutdown globally affects all cells in virus-infected cell culture and all host  
467 mRNAs. We provide evidence that the suppression of host mRNAs occurs only in infected but  
468 not bystander cells derived from the same infected samples. This finding indicates that  
469 previously reported direct effects of VEEV (Yin et al. 2009; Garmashova, Gorchakov, et al.  
470 2007), but not indirect mechanisms, mediate this suppression. Additionally, computing the  
471 distributions of vRNA expression in correlation with 5 groups of genes, distinguished by the level  
472 of gene expression in uninfected cells, demonstrated that highly expressed genes are more  
473 likely to be negatively correlated with vRNA abundance than genes that are expressed at a  
474 lower level. The cellular energy and machinery required to maintain a high level of gene

475 expression likely play a role in increasing the vulnerability of highly expressed cellular genes to  
476 VEEV-induced transcriptional shutdown.

477

478 We have previously reported the utility of viscRNA-Seq in discovering functional transcriptomic  
479 signatures and candidate pro- and antiviral factors of DENV and ZIKV infections (Zanini, Pu, et  
480 al. 2018; Zanini, Robinson, et al. 2018). Nevertheless, the high replication rate of VEEV and the  
481 transcriptional shutdown it induces challenged our ability to detect alterations in gene  
482 expression and identify pro- and antiviral factors. To overcome these challenges, we used  
483 several strategies. First, since the viscRNA-Seq analysis revealed large differences in vRNA  
484 abundance between cells infected with the same MOI and harvested at the same time point, we  
485 stratified cell populations based on vRNA abundance rather than time postinfection. Integrating  
486 differential gene expression and correlation analyses of vRNA abundance with gene expression  
487 across the entire human transcriptome facilitated the discovery of 206 genes that were both  
488 differentially expressed between the high and low vRNA groups and correlated with total vRNA.  
489 siRNA-mediated depletion and overexpression of a subset of these genes revealed that overall,  
490 genes involved in cytokine production, plus ATF3, a transcription factor commonly expressed in  
491 response to cellular stress, and TNFAIP3, an inhibitor of NF $\kappa$ B signaling, demonstrated a  
492 phenotype consistent with a rate-limiting proviral function, whereas a variety of regulatory  
493 genes, such as XBP1, TAF7 and DUSP14, were rate-limiting antiviral factors. ARRDC3, one of  
494 5 genes that were both differentially expressed and positively correlated with total vRNA,  
495 demonstrated a phenotype consistent with antiviral rather than a proviral effect. Interestingly,  
496 when studied in correlation with the individual vRNA transcripts, ARRDC3, a signaling arrestin  
497 family protein and a cargo-specific endosomal adaptor, was positively correlated with the 3'  
498 vRNA but negatively correlated with the 5' vRNA, suggesting that it may have a proviral effect  
499 during later stages and an antiviral effect in earlier stages of replication. By capturing such  
500 complex dynamics and not relying on averaging signals at distinct time points postinfection for

501 stratification, the viscRNA-Seq approach has an advantage over bulk sample knockdown or  
502 knockout approaches in identifying factors required for or restrictive of VEEV infection.

503

504 The high resolution provided by viscRNA-Seq enabled us to further focus on distinct cell  
505 populations, which facilitated identification of additional transcriptomic signatures. We  
506 discovered a subpopulation of cells consisting of 5% of total cells at 6 hpi that demonstrated  
507 unusually high viral replication upon completion of a single cycle of viral replication. Importantly,  
508 this cell subpopulation is associated with host cell gene expression that is distinct from cells  
509 harboring lower vRNA at the same time. It is intriguing to speculate that overexpression of the  
510 identified hits (e.g. the NEDD4-like E3 ubiquitin ligase that mediates trafficking, WWP1; the  
511 disintegrin, ADAMTS6; and the transcription regulator, MEIS2P) concurrently with  
512 underexpression of factors implicated in antiviral immune responses (such as ZMAT5 and  
513 PARP1) in this cell population drive the rapid increase in viral replication during the first viral life  
514 cycle.

515

516 To further increase the resolution of our analysis, we took advantage of the ability of viscRNA-  
517 Seq to detect the two VEEV transcripts. A prior study on IAV has detected different levels of  
518 various segments of the viral genome across cells and investigated how this finding relates to  
519 successful virion production (Russell, Trapnell, and Bloom 2018). Similarly, analysis of the  
520 stoichiometry of the 5' and 3' RNA reads of VEEV, a non-segmented virus, revealed a large cell-  
521 to-cell heterogeneity. Moreover, the 3'/5' vRNA ratio substantially increased at late stages of  
522 infection, consistent with a previous report in another alphavirus, SINV (Raju and Huang 1991).  
523 Remarkably, the histogram distribution curve of the Spearman correlation coefficients of all host  
524 genes with the 3'/5' read ratio in the same cell revealed a long tail of host genes whose  
525 expression increased with the 3'/5' read ratio. Our findings indicate that these changes in  
526 stoichiometry of the vRNA transcripts during late stages of VEEV infection are associated with  
527 upregulation of distinct genes, particularly those involved in intracellular trafficking pathways.

528 Notably, detection of these factors was only possible by correlating their expression specifically  
529 with the 3'/5' vRNA ratio and not the total vRNA reads. The involvement of these factors  
530 specifically in cells harboring high 3'/5' vRNA read ratio thus makes it experimentally  
531 challenging to further study them via bulk sample approaches. Nevertheless, it is tempting to  
532 speculate that some of the discovered late endosomal trafficking and lysosomal proteins  
533 (RAB7A (Verhoeven et al. 2003), BROX (Mu et al. 2012), VAMP7 (Pryor et al. 2008) and  
534 LAMP2 (Hubert et al. 2016)) may be involved in forming the CPV-I composed of modified  
535 endosomes and lysosomes in which VEEV RNA replication occurs (Spuul et al. 2010; Grimley,  
536 Berezsky, and Friedman 1968; Kujala et al. 2001; Salonen et al. 2003; Friedman et al. 1972;  
537 Pietilä, van Hemert, and Ahola 2018; Pietilä, Hellström, and Ahola 2017), and that ATP6V1B2  
538 (Bernasconi et al. 1990) may mediate the acidification of this acidic intracellular compartment  
539 (Jose, Taylor, and Kuhn 2017). Moreover, the positive correlation of proteins involved in ER to  
540 Golgi trafficking (SEC22B) (Zhang et al. 1999), regulation of secretion (PIP4K2A) (Rozenvayn  
541 and Flaumenhaft 2003), autophagy (LAMP2) (Hubert et al. 2016), actin polymerization (PFN2)  
542 (Honoré et al. 1993), and ESCRT machinery (BROX, a Bro1 domain-containing protein like  
543 ALIX) (Mu et al. 2012; Zhai et al. 2011), TSG101 and STAM2) with the 3'/5' vRNA read ratio  
544 proposes roles for these factors in late stages of the VEEV lifecycle, such as trafficking of the  
545 CPV-IIs to the plasma membrane, virion assembly, and/or budding (Garoff et al. 1994; Griffiths,  
546 Quinn, and Warren 1983; Soonsawad et al. 2010). These results propose a model wherein  
547 specific genes are upregulated within the profound transcriptional downregulation in a  
548 stoichiometry-dependent manner, and further illuminate the utility of viscRNA-Seq in identifying  
549 candidate proviral and antiviral factors, including druggable candidates for host-targeted antiviral  
550 approaches.

551  
552 Comparative evolutionary virology is an ideal application for single cell technologies because of  
553 the degree of genomic and functional diversity of infections. At the microevolutionary scale, we  
554 observed a negative correlation between the minor allele frequency of a nonsynonymous SNP

555 in the E3 protein and expression of the host genes BROX, TMED2, and SRSF6. Analysis of  
556 vRNA reads also revealed structural genome variants, the most common of which harbors a 36-  
557 base gap and is predicted to form a stable RNA structure. In the setting of IAV infection, an  
558 association between defective viral genomes and host responses was recently reported (Wang  
559 et al. 2020). Our findings highlight the unique opportunity provided by virus-inclusive single cell  
560 transcriptomic approaches to study genomic interactions between viruses and the host. Similar  
561 strategies could be used on engineered mutant viral libraries to study host-pathogen  
562 interactions in a massively parallel scale, by combining deep mutational scanning (Sourisseau  
563 et al. 2019) with host perturbation libraries (Hein and Weissman 2019).

564

565 At the macroevolutionary scale, we compared the effect of unrelated human RNA viruses on the  
566 host cell. To address the confounding effect of different host cell lines, we restricted the  
567 analyses in **Figures 5A-F** to genes with a similar baseline expression level across cell lines.  
568 When comparing the VEEV to the DENV and ZIKV datasets, we identified genes that were  
569 downregulated but not upregulated only in VEEV. We then compared genes that positively  
570 correlated with the 3'/5' VEEV RNA ratio with those correlating with DENV or ZIKV vRNA and  
571 found concordant signal for genes involved in protein processing and transport, whereas some  
572 cell cycle and apoptosis genes appeared to be specific to VEEV. When comparing data on five  
573 different viruses derived using different cell lines and technologies, we observed that  
574 downregulated host factors include a shared subset of cell cycle and nucleoside metabolism  
575 genes, whereas upregulated factors are more virus-specific. These findings indicate that while  
576 some cell cycle components are generally inhibited by many viruses, others might interact  
577 specifically with VEEV. The “correct” phylogeny of the five viruses could be recovered purely  
578 from the host transcriptome perturbation, i.e. without using viral genomic information, which is  
579 intriguing. More viruses across the viral phylogeny should be assessed to evaluate whether this  
580 signal is the result of conserved ancestral function or, alternatively, of convergent functional  
581 evolution.

582

583 Overall, our study uncovered global and gene-specific host transcriptional dynamics during  
584 VEEV infection at single cell resolution and presented a novel approach to elucidate the  
585 evolution of virus-host interactions.

586

587

## 588 **Acknowledgements**

589 This work was supported by HDTRA11810039 from the Defense Threat Reduction Agency  
590 (DTRA)/Fundamental Research to Counter Weapons of Mass Destruction, by the Chan  
591 Zuckerberg Biohub, and by a Stanford Bio-X Interdisciplinary Initiative Program Award. ZY was  
592 supported by the Maternal and Child Health Research Institute, Lucile Packard Foundation for  
593 Children's Health). NP was supported by the University of Washington School of Medicine Guy  
594 Tribble and Susan Barnes Graduate Discovery Fellowship. We thank investigators who have  
595 provided plasmids (see Methods). The opinions, interpretations, conclusions, and  
596 recommendations are those of the authors and are not necessarily endorsed by the U.S. Army  
597 or the other funders.

598

599 **Competing interests:** The authors declare that no competing interests exist.

600

601

602

603

604

605

606

607

608

609



610 **References:**

- 611 Aguilar, Patricia V., Jose G. Estrada-Franco, Roberto Navarro-Lopez, Cristina Ferro, Andrew D.  
612 Haddow, and Scott C. Weaver. 2011. "Endemic Venezuelan Equine Encephalitis in the  
613 Americas: Hidden under the Dengue Umbrella." *Future Virology* 6 (6): 721–40.
- 614 Amaya, Moushimi, Taryn Brooks-Faulconer, Tyler Lark, Forrest Keck, Charles Bailey, Venu  
615 Raman, and Aarthi Narayanan. 2016. "Venezuelan Equine Encephalitis Virus Non-  
616 Structural Protein 3 (nsP3) Interacts with RNA Helicases DDX1 and DDX3 in Infected  
617 Cells." *Antiviral Research* 131 (July): 49–60.
- 618 Anders, S., P. T. Pyl, and W. Huber. 2015. "HTSeq—a Python Framework to Work with High-  
619 Throughput Sequencing Data." *Bioinformatics* .  
620 <https://academic.oup.com/bioinformatics/article-abstract/31/2/166/2366196>.
- 621 Atasheva, Svetlana, Maryna Akhrymuk, Elena I. Frolova, and Ilya Frolov. 2012. "New PARP  
622 Gene with an Anti-Alphavirus Function." *Journal of Virology* 86 (15): 8147–60.
- 623 Atasheva, Svetlana, Elena I. Frolova, and Ilya Frolov. 2014. "Interferon-Stimulated poly(ADP-  
624 Ribose) Polymerases Are Potent Inhibitors of Cellular Translation and Virus Replication."  
625 *Journal of Virology* 88 (4): 2116–30.
- 626 Berge, Trygve O., Isaac S. Banks, W. D. Tigertt, and Others. 1961. "Attenua-Lion of Venezuelan  
627 Equine Encephalomyelitis Virus by Ire Vitro Cultivation in Guinea-Pig Heart Cells."  
628 *American Journal of Hygiene* 73 (2): 209–18.
- 629 Bernasconi, Paul, T. Rausch, I. Struve, Louis Morgan, and L. Taiz. 1990. "An mRNA from  
630 Human Brain Encodes an Isoform of the B Subunit of the Vacuolar H (+)-ATPase." *The*  
631 *Journal of Biological Chemistry* 265 (29): 17428–31.
- 632 Blondel, Vincent D., Jean-Loup Guillaume, Renaud Lambiotte, and Etienne Lefebvre. 2008.  
633 "Fast Unfolding of Communities in Large Networks." *Journal of Statistical Mechanics:*  
634 *Theory and Experiment*. <https://doi.org/10.1088/1742-5468/2008/10/p10008>.
- 635 Butler, Andrew, Paul Hoffman, Peter Smibert, Efthymia Papalexi, and Rahul Satija. 2018.  
636 "Integrating Single-Cell Transcriptomic Data across Different Conditions, Technologies, and  
637 Species." *Nature Biotechnology* 36 (5): 411–20.
- 638 Coutant, Eloi P., Glwadys Gagnot, Vincent Hervin, Racha Baatallah, Sophie Goyard, Yves  
639 Jacob, Thierry Rose, and Yves Janin. 2019. "Bioluminescence Profiling of  
640 NanoKAZ/NanoLuc Luciferase Using a Chemical Library of Coelenterazine Analogues."  
641 *Chemistry – A European Journal*. <https://doi.org/10.1002/chem.201904844>.
- 642 Coutant, Eloi P., Sophie Goyard, Vincent Hervin, Glwadys Gagnot, Racha Baatallah, Yves  
643 Jacob, Thierry Rose, and Yves L. Janin. 2019. "Gram-Scale Synthesis of Luciferins Derived  
644 from Coelenterazine and Original Insights into Their Bioluminescence Properties." *Organic*



- 645 & *Biomolecular Chemistry* 17 (15): 3709–13.
- 646 Dobin, Alexander, Carrie A. Davis, Felix Schlesinger, Jorg Drenkow, Chris Zaleski, Sonali Jha,  
647 Philippe Batut, Mark Chaisson, and Thomas R. Gingeras. 2013. “STAR: Ultrafast Universal  
648 RNA-Seq Aligner.” *Bioinformatics* 29 (1): 15–21.
- 649 Friedman, R. M., J. G. Levin, P. M. Grimley, and I. K. Berezsky. 1972. “Membrane-Associated  
650 Replication Complex in Arbovirus Infection.” *Journal of Virology* 10 (3): 504–15.
- 651 Fu, Mingui, and Perry J. Blackshear. 2017. “RNA-Binding Proteins in Immune Regulation: A  
652 Focus on CCCH Zinc Finger Proteins.” *Nature Reviews. Immunology* 17 (2): 130–43.
- 653 Garmashova, Natalia, Svetlana Atasheva, Wenli Kang, Scott C. Weaver, Elena Frolova, and  
654 Ilya Frolov. 2007. “Analysis of Venezuelan Equine Encephalitis Virus Capsid Protein  
655 Function in the Inhibition of Cellular Transcription.” *Journal of Virology* 81 (24): 13552–65.
- 656 Garmashova, Natalia, Rodion Gorchakov, Eugenia Volkova, Slobodan Paessler, Elena Frolova,  
657 and Ilya Frolov. 2007. “The Old World and New World Alphaviruses Use Different Virus-  
658 Specific Proteins for Induction of Transcriptional Shutoff.” *Journal of Virology* 81 (5): 2472–  
659 84.
- 660 Garoff, H., J. Wilschut, P. Liljeström, J. M. Wahlberg, R. Bron, M. Suomalainen, J. Smyth, A.  
661 Salminen, B. U. Barth, and H. Zhao. 1994. “Assembly and Entry Mechanisms of Semliki  
662 Forest Virus.” *Archives of Virology. Supplementum* 9: 329–38.
- 663 Gorman, Matthew J., Elizabeth A. Caine, Konstantin Zaitsev, Matthew C. Begley, James  
664 Weger-Lucarelli, Melissa B. Uccellini, Shashank Tripathi, et al. 2018. “An  
665 Immunocompetent Mouse Model of Zika Virus Infection.” *Cell Host & Microbe* 23 (5): 672–  
666 85.e6.
- 667 Griffiths, G., P. Quinn, and G. Warren. 1983. “Dissection of the Golgi Complex. I. Monensin  
668 Inhibits the Transport of Viral Membrane Proteins from Medial to Trans Golgi Cisternae in  
669 Baby Hamster Kidney Cells Infected with Semliki Forest Virus.” *The Journal of Cell Biology*  
670 96 (3): 835–50.
- 671 Grimley, P. M., I. K. Berezsky, and R. M. Friedman. 1968. “Cytoplasmic Structures Associated  
672 with an Arbovirus Infection: Loci of Viral Ribonucleic Acid Synthesis.” *Journal of Virology* 2  
673 (11): 1326–38.
- 674 Gruber, Andreas R., Ronny Lorenz, Stephan H. Bernhart, Richard Neuböck, and Ivo L.  
675 Hofacker. 2008. “The Vienna RNA Website.” *Nucleic Acids Research* 36 (Web Server  
676 issue): W70–74.
- 677 Gupta, Paridhi, Anuj Sharma, Jing Han, Amy Yang, Manish Bhomia, Barbara Knollmann-  
678 Ritschel, Raj K. Puri, and Radha K. Maheshwari. 2017. “Differential Host Gene Responses  
679 from Infection with Neurovirulent and Partially-Neurovirulent Strains of Venezuelan Equine  
680 Encephalitis Virus.” *BMC Infectious Diseases* 17 (1): 309.

- 681 Hawley, Robert J., and Edward M. Eitzen Jr. 2001. "Biological Weapons—a Primer for  
682 Microbiologists." *Annual Review of Microbiology*.  
683 <https://doi.org/10.1146/annurev.micro.55.1.235>.
- 684 Hein, Marco Y., and Jonathan S. Weissman. 2019. "Functional Single-Cell Genomics of Human  
685 Cytomegalovirus Infection." *bioRxiv*. <https://doi.org/10.1101/775080>.
- 686 Honoré, B., P. Madsen, A. H. Andersen, and H. Leffers. 1993. "Cloning and Expression of a  
687 Novel Human Profilin Variant, Profilin II." *FEBS Letters* 330 (2): 151–55.
- 688 Hoyer, Stephan, and Joe Hamman. 2017. "Xarray: ND Labeled Arrays and Datasets in Python."  
689 *Journal of Open Research Software* 5 (1).  
690 <https://openresearchsoftware.metajnl.com/articles/148/>.
- 691 Hubert, Virginie, Andrea Peschel, Brigitte Langer, Marion Gröger, Andrew Rees, and Renate  
692 Kain. 2016. "LAMP-2 Is Required for Incorporating Syntaxin-17 into Autophagosomes and  
693 for Their Fusion with Lysosomes." *Biology Open* 5 (10): 1516–29.
- 694 Hunter, John D. 2007. "Matplotlib: A 2D Graphics Environment." *Computing in Science &*  
695 *Engineering* 9 (3): 90–95.
- 696 Jose, Joyce, Aaron B. Taylor, and Richard J. Kuhn. 2017. "Spatial and Temporal Analysis of  
697 Alphavirus Replication and Assembly in Mammalian and Mosquito Cells." *mBio* 8 (1).  
698 <https://doi.org/10.1128/mBio.02294-16>.
- 699 Keck, Forrest, Stephanie Kortchak, Allison Bakovic, Brian Roberts, Nitin Agrawal, and Aarthi  
700 Narayanan. 2018. "Direct and Indirect pro-Inflammatory Cytokine Response Resulting from  
701 TC-83 Infection of Glial Cells." *Virulence*. <https://doi.org/10.1080/21505594.2018.1509668>.
- 702 Kielian, Margaret, Chantal Chanel-Vos, and Maofu Liao. 2010. "Alphavirus Entry and Membrane  
703 Fusion." *Viruses* 2 (4): 796–825.
- 704 Kujala, P., A. Ikäheimonen, N. Ehsani, H. Vihinen, P. Auvinen, and L. Kääriäinen. 2001.  
705 "Biogenesis of the Semliki Forest Virus RNA Replication Complex." *Journal of Virology* 75  
706 (8): 3873–84.
- 707 Lemm, J. A., T. Rügenapf, E. G. Strauss, J. H. Strauss, and C. M. Rice. 1994. "Polypeptide  
708 Requirements for Assembly of Functional Sindbis Virus Replication Complexes: A Model  
709 for the Temporal Regulation of Minus- and plus-Strand RNA Synthesis." *The EMBO*  
710 *Journal*. <https://doi.org/10.1002/j.1460-2075.1994.tb06587.x>.
- 711 Levis, R., S. Schlesinger, and H. V. Huang. 1990. "Promoter for Sindbis Virus RNA-Dependent  
712 Subgenomic RNA Transcription." *Journal of Virology* 64 (4): 1726–33.
- 713 Maaten, Laurens van der, and Geoffrey Hinton. 2008. "Visualizing Data Using T-SNE." *Journal*  
714 *of Machine Learning Research: JMLR* 9 (Nov): 2579–2605.
- 715 Mu, Ruiling, Vincent Dussupt, Jiansheng Jiang, Paola Sette, Victoria Rudd, Watchalee  
716 Chuenchor, Nana F. Bello, Fadila Bouamr, and Tsan Sam Xiao. 2012. "Two Distinct

- 717 Binding Modes Define the Interaction of Brox with the C-Terminal Tails of CHMP5 and  
718 CHMP4B.” *Structure* 20 (5): 887–98.
- 719 O’Neal, Justin T., Amit A. Upadhyay, Amber Wolabaugh, Nirav B. Patel, Steven E. Bosinger,  
720 and Mehul S. Suthar. 2019. “West Nile Virus-Inclusive Single-Cell RNA Sequencing  
721 Reveals Heterogeneity in the Type I Interferon Response within Single Cells.” *Journal of*  
722 *Virology* 93 (6). <https://doi.org/10.1128/JVI.01778-18>.
- 723 Pietilä, Maija K., Kirsi Hellström, and Tero Ahola. 2017. “Alphavirus Polymerase and RNA  
724 Replication.” *Virus Research*. <https://doi.org/10.1016/j.virusres.2017.01.007>.
- 725 Pietilä, Maija K., Martijn J. van Hemert, and Tero Ahola. 2018. “Purification of Highly Active  
726 Alphavirus Replication Complexes Demonstrates Altered Fractionation of Multiple Cellular  
727 Membranes.” *Journal of Virology* 92 (8). <https://doi.org/10.1128/JVI.01852-17>.
- 728 PontÉN, J. A. N., and Elizabeth H. Macintyre. 1968. “Long Term Culture of Normal and  
729 Neoplastic Human Glia.” *Acta Pathologica et Microbiologica Scandinavica* 74 (4): 465–86.
- 730 Pryor, Paul R., Lauren Jackson, Sally R. Gray, Melissa A. Edeling, Amanda Thompson,  
731 Christopher M. Sanderson, Philip R. Evans, David J. Owen, and J. Paul Luzio. 2008.  
732 “Molecular Basis for the Sorting of the SNARE VAMP7 into Endocytic Clathrin-Coated  
733 Vesicles by the ArfGAP Hrb.” *Cell* 134 (5): 817–27.
- 734 Qi, Shiqian, Morgan O’Hayre, J. Silvio Gutkind, and James H. Hurley. 2014. “Structural and  
735 Biochemical Basis for Ubiquitin Ligase Recruitment by Arrestin-Related Domain-Containing  
736 Protein-3 (ARRDC3).” *The Journal of Biological Chemistry* 289 (8): 4743–52.
- 737 Radoshitzky, Sheli R., Gianluca Pegoraro, Xi Oli Chī, Lián D Ng, Chih-Yuan Chiang, Lucas  
738 Jozwick, Jeremiah C. Clester, et al. 2016. “siRNA Screen Identifies Trafficking Host Factors  
739 That Modulate Alphavirus Infection.” *PLoS Pathogens* 12 (3): e1005466.
- 740 Raju, R., and H. V. Huang. 1991. “Analysis of Sindbis Virus Promoter Recognition in Vivo, Using  
741 Novel Vectors with Two Subgenomic mRNA Promoters.” *Journal of Virology* 65 (5): 2501–  
742 10.
- 743 Rozenvayn, Nataliya, and Robert Flaumenhaft. 2003. “Protein Kinase C Mediates Translocation  
744 of Type II Phosphatidylinositol 5-Phosphate 4-Kinase Required for Platelet  $\alpha$ -Granule  
745 Secretion.” *The Journal of Biological Chemistry* 278 (10): 8126–34.
- 746 Rual, Jean-François, Tomoko Hirozane-Kishikawa, Tong Hao, Nicolas Bertin, Siming Li, Amélie  
747 Dricot, Ning Li, et al. 2004. “Human ORFeome Version 1.1: A Platform for Reverse  
748 Proteomics.” *Genome Research* 14 (10B): 2128–35.
- 749 Russell, Alistair B., Elizaveta Elshina, Jacob R. Kowalsky, Aartjan J. W. Te Velthuis, and Jesse  
750 D. Bloom. 2019. “Single-Cell Virus Sequencing of Influenza Infections That Trigger Innate  
751 Immunity.” *Journal of Virology* 93 (14). <https://doi.org/10.1128/JVI.00500-19>.
- 752 Russell, Alistair B., Cole Trapnell, and Jesse D. Bloom. 2018. “Extreme Heterogeneity of

- 753 Influenza Virus Infection in Single Cells.” *eLife* 7 (February).  
754 <https://doi.org/10.7554/eLife.32303>.
- 755 Salonen, Anne, Lidia Vasiljeva, Andres Merits, Julia Magden, Eija Jokitalo, and Leevi  
756 Kääriäinen. 2003. “Properly Folded Nonstructural Polyprotein Directs the Semliki Forest  
757 Virus Replication Complex to the Endosomal Compartment.” *Journal of Virology* 77 (3):  
758 1691–1702.
- 759 Sharma, Anuj, and Barbara Knollmann-Ritschel. 2019. “Current Understanding of the Molecular  
760 Basis of Venezuelan Equine Encephalitis Virus Pathogenesis and Vaccine Development.”  
761 *Viruses*. <https://doi.org/10.3390/v11020164>.
- 762 Shirako, Y., and J. H. Strauss. 1990. “Cleavage between nsP1 and nsP2 Initiates the  
763 Processing Pathway of Sindbis Virus Nonstructural Polyprotein P123.” *Virology* 177 (1):  
764 54–64.
- 765 Soonsawad, Pan, Li Xing, Emerson Milla, Juan M. Espinoza, Masaaki Kawano, Michael Marko,  
766 Chyongere Hsieh, et al. 2010. “Structural Evidence of Glycoprotein Assembly in Cellular  
767 Membrane Compartments prior to Alphavirus Budding.” *Journal of Virology* 84 (21): 11145–  
768 51.
- 769 Sourisseau, Marion, Daniel J. P. Lawrence, Megan C. Schwarz, Carina H. Storrs, Ethan C. Veit,  
770 Jesse D. Bloom, and Matthew J. Evans. 2019. “Deep Mutational Scanning  
771 Comprehensively Maps How Zika Envelope Protein Mutations Affect Viral Growth and  
772 Antibody Escape.” *Journal of Virology* 93 (23). <https://doi.org/10.1128/JVI.01291-19>.
- 773 Spuul, P., G. Balistreri, L. Kaariainen, and T. Ahola. 2010. “Phosphatidylinositol 3-Kinase-,  
774 Actin-, and Microtubule-Dependent Transport of Semliki Forest Virus Replication  
775 Complexes from the Plasma Membrane to Modified Lysosomes.” *Journal of Virology*.  
776 <https://doi.org/10.1128/jvi.00477-10>.
- 777 Strauss, J. H., and E. G. Strauss. 1994. “The Alphaviruses: Gene Expression, Replication, and  
778 Evolution.” *Microbiological Reviews* 58 (3): 491–562.
- 779 Sun, Chengqun, Christina L. Gardner, Alan M. Watson, Kate D. Ryman, and William B.  
780 Klimstra. 2014. “Stable, High-Level Expression of Reporter Proteins from Improved  
781 Alphavirus Expression Vectors to Track Replication and Dissemination during Encephalitic  
782 and Arthritogenic Disease.” *Journal of Virology* 88 (4): 2035–46.
- 783 Traag, V. A., L. Waltman, and N. J. van Eck. 2019. “From Louvain to Leiden: Guaranteeing  
784 Well-Connected Communities.” *Scientific Reports*. <https://doi.org/10.1038/s41598-019-41695-z>.
- 785  
786 Verhoeven, Kristien, Peter De Jonghe, Katrien Coen, Nathalie Verpoorten, Michaela Auer-  
787 Grumbach, Jennifer M. Kwon, David FitzPatrick, et al. 2003. “Mutations in the Small GTP-  
788 Ase Late Endosomal Protein RAB7 Cause Charcot-Marie-Tooth Type 2B Neuropathy.”

- 789 *American Journal of Human Genetics* 72 (3): 722–27.
- 790 Wang, Chang, Christian V. Forst, Tsui-Wen Chou, Adam Geber, Minghui Wang, Wissam  
791 Hamou, Melissa Smith, et al. 2020. “Cell-to-Cell Variation in Defective Virus Expression and  
792 Effects on Host Responses during Influenza Virus Infection.” *mBio* 11 (1).  
793 <https://doi.org/10.1128/mBio.02880-19>.
- 794 Waskom, Michael L., Dharshan Kumaran, Alan M. Gordon, Jesse Rissman, and Anthony D.  
795 Wagner. 2014. “Frontoparietal Representations of Task Context Support the Flexible  
796 Control of Goal-Directed Cognition.” *The Journal of Neuroscience: The Official Journal of*  
797 *the Society for Neuroscience* 34 (32): 10743–55.
- 798 Wickham, Hadley. 2016. *ggplot2: Elegant Graphics for Data Analysis*. Springer.
- 799 Yin, Jun, Christina L. Gardner, Crystal W. Burke, Kate D. Ryman, and William B. Klimstra. 2009.  
800 “Similarities and Differences in Antagonism of Neuron Alpha/beta Interferon Responses by  
801 Venezuelan Equine Encephalitis and Sindbis Alphaviruses.” *Journal of Virology* 83 (19):  
802 10036–47.
- 803 Zanini, Fabio, Szu-Yuan Pu, Elena Bekerman, Shirir Einav, and Stephen R. Quake. 2018.  
804 “Single-Cell Transcriptional Dynamics of Flavivirus Infection.” *eLife* 7 (February).  
805 <https://doi.org/10.7554/eLife.32942>.
- 806 Zanini, Fabio, Makeda L. Robinson, Derek Croote, Malaya Kumar Sahoo, Ana Maria Sanz,  
807 Eliana Ortiz-Lasso, Ludwig Luis Albornoz, et al. 2018. “Virus-Inclusive Single-Cell RNA  
808 Sequencing Reveals the Molecular Signature of Progression to Severe Dengue.”  
809 *Proceedings of the National Academy of Sciences of the United States of America* 115  
810 (52): E12363–69.
- 811 Zhai, Qianting, Michael B. Landesman, Howard Robinson, Wesley I. Sundquist, and Christopher  
812 P. Hill. 2011. “Structure of the Bro1 Domain Protein BROX and Functional Analyses of the  
813 ALIX Bro1 Domain in HIV-1 Budding.” *PloS One* 6 (12): e27466.
- 814 Zhang, T., S. H. Wong, B. L. Tang, Y. Xu, and W. Hong. 1999. “Morphological and Functional  
815 Association of Sec22b/ERS-24 with the Pre-Golgi Intermediate Compartment.” *Molecular*  
816 *Biology of the Cell* 10 (2): 435–53.
- 817 Zhou, Yingyao, Bin Zhou, Lars Pache, Max Chang, Alireza Hadj Khodabakhshi, Olga  
818 Tanaseichuk, Christopher Benner, and Sumit K. Chanda. 2019. “Metascape Provides a  
819 Biologist-Oriented Resource for the Analysis of Systems-Level Datasets.” *Nature*  
820 *Communications* 10 (1): 1523.

821



## 822 **Materials and methods**

### 823 **Cells**

824 U-87 MG and BHK-21 cell lines were obtained from ATCC (Manassas, VA). Cells were grown in  
825 Dulbecco's Modified Eagle's medium (DMEM, Mediatech, Manassas, VA), supplemented with  
826 1% Penicillin-Streptomycin solution, 1% L-glutamine 200 mM (Thermo Fisher Scientific,  
827 Waltham, MA) and 10% Fetal Bovine Serum (FBS, Omega Scientific, INC, Tarzana, CA). Cells  
828 were maintained in a humidified incubator with 5% CO<sub>2</sub> at 37 °C. Cells were tested negative for  
829 mycoplasma by the MycoAlert mycoplasma detection kit (Lonza, Morristown, NJ).

830

### 831 **Plasmids and virus constructs**

832 The plasmids encoding infectious VEEV TC-83 with a GFP reporter (VEEV TC-83-Cap-eGFP-  
833 Tav, hereafter VEEV-TC-83-GFP) or a nanoluciferase reporter (VEEV TC-83-Cap-nLuc-Tav,  
834 hereafter VEEV-TC-83-nLuc), were a gift from Dr. William B. Klimstra (Department of  
835 Immunology, University of Pittsburgh) (Sun et al. 2014). Open reading frames (ORFs) encoding  
836 24 hits were selected from the Human ORFeome library of cDNA clones (Open Biosystems)  
837 (Rual et al. 2004) and recombined into a FLAG (for FLAG tagging) vector using Gateway  
838 technology (Invitrogen).

839

### 840 **Virus production**

841 Viral RNA (vRNA) (VEEV-TC-83-GFP or nLuc) was transcribed *in vitro* from cDNA plasmid  
842 templates linearized with MluI via MegaScript Sp6 kit (Invitrogen #AM1330) and electroporated  
843 into BHK-21 cells. VEEV was harvested from the supernatant 24 hours postelectroporation,  
844 clarified from cell debris by centrifugation, and stored at -80 °C. Virus stock titers were  
845 determined by standard BHK-21 cell plaque assay, and titers were expressed as PFU/ml.

846

### 847 **Infection assays**

848 U-87 MG cells were infected with VEEV-TC-83-GFP at various MOIs (0, 0.1, and 1) and  
849 harvested at various time points postinfection. For the functional screens, U-87 MG cells were  
850 infected with VEEV-TC83-nLuc in 8 replicates at MOI of 0.01. Overall infection was measured at  
851 18 hpi via a nanoluciferase assay using a luciferin solution obtained from the hydrolysis of its O-  
852 acetylated precursor, hikarazine-103 (prepared by Dr. Yves Janin, Pasteur Institute, France) as  
853 a substrate (Coutant, Goyard, et al. 2019; Coutant, Gagnot, et al. 2019).

854

### 855 **Loss-of-function assays**

856 siRNAs (1 pmol) were transfected into cells using lipofectamine RNAiMAX transfection reagent  
857 (Invitrogen) 96 hours prior to infection with VEEV-TC-83-nLuc at MOI of 0.01. Custom Cherry-  
858 Pick ON-TARGETplus siRNA library against 24 genes was purchased from Dharmacon (see  
859 Supplementary Table 1 for gene and siRNA sequence details).

860

### 861 **Gain-of-function assays**

862 Individual plasmids encoding 24 human genes or empty control vector were transfected  
863 individually into U-87 MG cells with lipofectamine-3000 (Invitrogen) 48 hours prior to infection  
864 with VEEV-TC-83-nLuc at MOI of 0.01.

865

### 866 **Viability assays**

867 Viability was measured using alamarBlue reagent (Invitrogen) according to the manufacturer's  
868 protocol. Fluorescence was detected at 560 nm on an Infinite M1000 plate reader (Tecan).

869

### 870 **Detection of infected cells using VEEV-specific capture oligo**

871 To optimize the viscrRNA-Seq protocol for a wide dynamic range of vRNA amount per VEEV-  
872 infected cells, we designed and screened eight oligo capture as follows. The sequences that  
873 hybridize to VEEV sequence are underlined.

874

| Oligo name | Sequence (5' to 3')                                                  | Position on VEEV genome |
|------------|----------------------------------------------------------------------|-------------------------|
| VEEV_1     | <u>AAGCAGTGGTATCAACGCAGAGTACT</u><br><u>TCCTTATCAGTTATTTCTTACAG</u>  | 353 - 377               |
| VEEV_2     | <u>AAGCAGTGGTATCAACGCAGAGTACA</u><br><u>GATAATTTTCACTCTTGAGTACA</u>  | 1742 - 1766             |
| VEEV_3     | <u>AAGCAGTGGTATCAACGCAGAGTACT</u><br><u>TTTAGGTCTTATAATGGCTATGAG</u> | 2442 - 2466             |
| VEEV_4     | <u>AAGCAGTGGTATCAACGCAGAGTACT</u><br><u>GCTGATAGTGATGGTATTTATATG</u> | 3700 - 3724             |
| VEEV_5     | <u>AAGCAGTGGTATCAACGCAGAGTACC</u><br><u>TACTGACTTGTAATTGTTATCGTT</u> | 4320 - 4344             |
| VEEV_6     | <u>AAGCAGTGGTATCAACGCAGAGTACG</u><br><u>TAGTAATTCTTCTTTTTCTTGGTC</u> | 5823 - 5847             |
| VEEV_7     | <u>AAGCAGTGGTATCAACGCAGAGTACT</u><br><u>TCATTATTACACGCATATTTCTTG</u> | 6383 - 6407             |
| VEEV_8     | <u>AAGCAGTGGTATCAACGCAGAGTACG</u><br><u>CATCTATAATCTTGACTTCCATAT</u> | 7162 - 7286             |

875

876 To screen these capture oligo, we first generated cDNA from VEEV-infected cells in the  
877 presence of each or combinations of VEEV-specific capture oligo. Specifically, 30 pg of both  
878 vRNA and cellular RNA purified from VEEV-infected cells was reverse-transcribed to cDNA in a  
879 reaction containing SuperScript™ IV reverse transcriptase, 1X First Strand buffer (Invitrogen), 5  
880 mM DTT, 1 M betaine, 6 mM MgCl<sub>2</sub>, 1 μM oligo dT and each or combinations of 100 nM reverse



881 VEEV oligo capture. Subsequently, cDNA underwent 21-cycle PCR amplification using ISPCR  
882 primers. cDNA was then purified using Ampure XP beads (Beckman Coulter) at the ratio of 0.8  
883 and eluted in 15  $\mu$ L EB buffer. Fragments of purified, concentrated cDNA were visualized and  
884 quantified using bioanalyzer (DNA High Sensitivity kit, Agilent Technologies). To quantify the  
885 amount of vRNA captured by each or combinations of oligo capture, these purified cDNA were  
886 also subjected to qPCR (Hot-start OneTaq (New England Biolabs), 1x Standard Taq buffer, 1x  
887 Evagreen (Biotium), forward primer: ATTCTAAGCACAAAGTATCATTGTAT and reverse primer:  
888 TTAGTTGCATACTTATACAATCTGT located upstream of all the capture oligos. VEEV\_1 and  
889 VEEV\_2 yielded the highest copies of viral cDNA and did not generate significant primer dimers.  
890 Therefore, this combination of the capture oligo was selected for downstream experiments.

891

### 892 **Single cell sorting**

893 At each time point, cells were trypsinized for 10 min, spun and resuspended in 1 mL fresh  
894 media. Within 15 min, cells were pelleted again and resuspended in 2 ml 1X phosphate-buffered  
895 saline (PBS) buffer at a concentration of  $10^6$  cells per ml. Cells were filtered through a 40  $\mu$ m  
896 filter into a 5 ml FACS tube and sorted on a Sony SH800 sorter using SYTOX™ Blue dead cell  
897 stain (ThermoFisher) to distinguish living cells from dead cells and debris. VEEV harboring cells  
898 were sorted based on GFP signal. Cells were sorted into 384-well PCR plates containing 0.5  $\mu$ l  
899 of lysis buffer using 'Single cell' purity mode. A total of 12 384-well plates of single cells were  
900 sorted for the VEEV time course.

901

### 902 **Lysis buffer, reverse transcription, and PCR**

903 To capture and amplify both mRNA and vRNA from the same cell, the Smart-seq2 protocol was  
904 adapted (Picelli et al., 2014). All volumes were reduced by a factor of 12 compared to the  
905 original protocol to enable high-throughput processing of 384-well plates. ERCC spike-in RNA  
906 was added at a concentration of 1:10 of the normal amount. The lysis buffer contained 100nM

907 of oligo-dT primer, 100 mM of virus specific capture oligo mix (i.e. VEEV\_1 and VEEV\_2) to  
908 capture the positive-stranded virus RNA.

909

910 Other virus-specific primers and higher primer concentrations were tested but resulted in a large  
911 fraction of primer dimers. In order to reduce interference between the virus-specific primer and  
912 the Template Switching Oligo (TSO) used to extend the RT products, a 5'-blocked biotinylated  
913 TSO was used at the standard concentration. Reverse transcription (RT) and PCR of the cDNA  
914 were performed in a total volume of 1  $\mu$ l and 2.5  $\mu$ l for each well respectively. The resulting  
915 cDNAs were amplified for 21 cycles. Lambda exonuclease was added to the PCR buffer at a  
916 final concentration of 0.0225 U/ $\mu$ l and the RT products were incubated at 37 °C for 30 min  
917 before melting the RNA-DNA hybrid (as it was observed that this reduced the amount of low-  
918 molecular weight bands from the PCR products). The cDNA was then diluted 1 to 7 in EB buffer  
919 for a final volume of 17.5  $\mu$ l. All pipetting steps were performed using a Mosquito HTS robotic  
920 platform (TTP Labtech).

921

### 922 **cDNA quantification**

923 To quantify the amount of cDNA in each well after PCR, a commercial fluorometric assay was  
924 used (ThermoFisher Quant-It™ Picogreen). Briefly, 1  $\mu$ l of cDNA and 50  $\mu$ l of 1:200 dye-buffer  
925 mix were pipetted together into a flat-bottom 384-well plate (Corning 3711). For each plate, six  
926 wells were used as standard wells. 1  $\mu$ l dd H<sub>2</sub>O was added into one standard well as blank. The  
927 standard solutions were diluted into 5 concentrations (0.1, 0.2, 0.4, 0.8, 1.6 ng/ $\mu$ l) and added 1  $\mu$ l  
928 into the remaining 5 standard wells. The plate was vortexed for 2 min, centrifuged, incubated in  
929 the dark for 5 min, and measured on a plate reader at wavelength 550 nm. cDNA  
930 concentrations were calculated via an affine fit to the standard wells.

931

### 932 **Library preparation and sequencing**

933 For each time point, one plate was sent for library preparation and sequencing. In total, 6 plates  
934 (2304 cells) were prepared. Sequencing libraries were prepared using the illumina Nextera XT  
935 kit according to the manufacturer's instructions, with the following exceptions: (1) we used a  
936 smaller reaction volume (around 1  $\mu$ l per cell); (2) we chose a slightly higher cDNA  
937 concentration (0.4 ng/ $\mu$ l) as input, to compensate for the lack of bead purification upstream; (3)  
938 we used the commercial 24 i7 barcodes and the 64 new i5 barcode sequences. We noticed a  
939 low level of cross-talk between these barcodes, indicated by up to five virus reads found in a  
940 few uninfected cells. However, considering that a sizeable fraction of cells in the same  
941 sequencing run (late infected and high MOI) had thousands of virus reads, the amount of cross-  
942 talk between barcodes appears to be of the order of 1 in 10,000 or less. We used Illumina  
943 Novaseq sequencer for sequencing.

944

#### 945 **Bioinformatics pipeline**

946 Sequencing reads were mapped against the human GRCh38 genome with supplementary  
947 ERCC sequences and TC-83-VEEV-GFP genome using STAR Aligner (Dobin et al. 2013) .  
948 Genes were counted using htseq-count (Anders, Pyl, and Huber 2015). The Stanford high  
949 performance computing cluster Sherlock 2.0 was used for the computations. Once the  
950 gene/virus counts were available, the downstream analysis was performed on laptops using the  
951 packages Seurat (Butler et al. 2018) and singlet (<https://github.com/iosonofabio/singlet>), as well  
952 as custom R and Python scripts. Ggplot2 (Wickham 2016), matplotlib (Hunter 2007) and  
953 seaborn (Waskom et al. 2014) were used for plotting.

954

955 For the mutational analysis, all reads mapping to VEEV were extracted from all cells with a  
956 unique identifier of the cell of origin, and all four possible alleles at each nucleotide were  
957 counted by custom scripts based on pysam (<https://github.com/pysam-developers/pysam>) and  
958 wrapped in an xarray Dataset (Hoyer and Hamman 2017). The analysis was restricted to  
959 infected cells with an average of 100 or more reads per viral genomic site to reduce shot noise.

960

961 Comparison with flaviviruses was performed as follows. First, host genes with similar expression  
962 (within a factor of 10) in counts per millions (cpm) were identified. Within that class, correlations  
963 with vRNA for VEEV, DENV, ZIKV were computed separately. Host factors with the highest  
964 discrepancies between pairs of viruses were identified. For Figures 5A-C, a gene was chosen  
965 from the most discrepant genes exemplifying the different behaviors observed and the cells  
966 were scattered using vRNA abundance and gene expression axes, and colored by virus. For  
967 Figure 5D, the host counts for each gene from all three experiments (in cpm) were added and  
968 fractions belonging to each experiment were computed. Because the sum is constrained to be  
969 100%, ternary plots could be used for plotting the three different fractions in two dimensions. For  
970 figures 5E-F, for each gene shown we computed its percentile in correlation with DENV and  
971 ZIKV vRNA, i.e. the percentage of other host genes with a correlation less than this focal gene.  
972 This transformation emphasizes the top correlates/anticorrelates against batch effects and  
973 different multiplicities of infection in the DENV and ZIKV experiments. For figures 5G-I,  
974 published tables of counts and metadata were downloaded from links present in each  
975 publication, normalized to counts per millions, and filtered for low-quality cells. We computed the  
976 correlation of host gene expression and vRNA in each experiment, then features were selected  
977 that had a high rank in at least one virus and the selected correlation coefficients were centered  
978 and normalized between -1 and 1 for each virus to enable meaningful cross-experiment  
979 comparison. Principal Component Analysis (PCA), t-SNE, similarity graphs, and Leiden  
980 clustering (Traag et al. 2019) were computed and plotted

981

## 982 **Cell selection and normalization**

983 The criteria to select cells were as follows: total reads > 300,000, gene counts > 500 and a ratio  
984 of ERCC spike-in RNA to total reads ratio < 0.05. Based on these criteria, 2004 out of 2301  
985 cells were selected for downstream analysis. Due to the high viral copies of VEEV in cells  
986 infected for 12 and 24 hrs (more than 10%), traditional normalization (dividing by total reads)

987 caused a bias which underestimated the expression of host genes. To avoid this, we normalized  
988 gene counts to ERCC total reads, since these are not affected by the virus. Each gene count  
989 column (including virus reads) was thus divided by ERCC total reads and then log transformed.

990

#### 991 **Data and code availability**

992 The single cell RNA-Seq data for this study is available on GEO at submission number:

993 GSE145815 (<https://www.ncbi.nlm.nih.gov/geo/query/acc.cgi?acc=GSE145815>). The code used

994 in the computational analyses can be found at [https://github.com/saberyzy/VEEV-single\\_cell](https://github.com/saberyzy/VEEV-single_cell).

995 Processed count and metadata tables are also available on FigShare at

996 [https://figshare.com/articles/Untitled\\_Item/11874198](https://figshare.com/articles/Untitled_Item/11874198).

997

998

999

1000

1001

1002

1003

1004

1005

1006

1007

1008

1009

1010

1011

1012

1013

1014 **Figures and legends:**

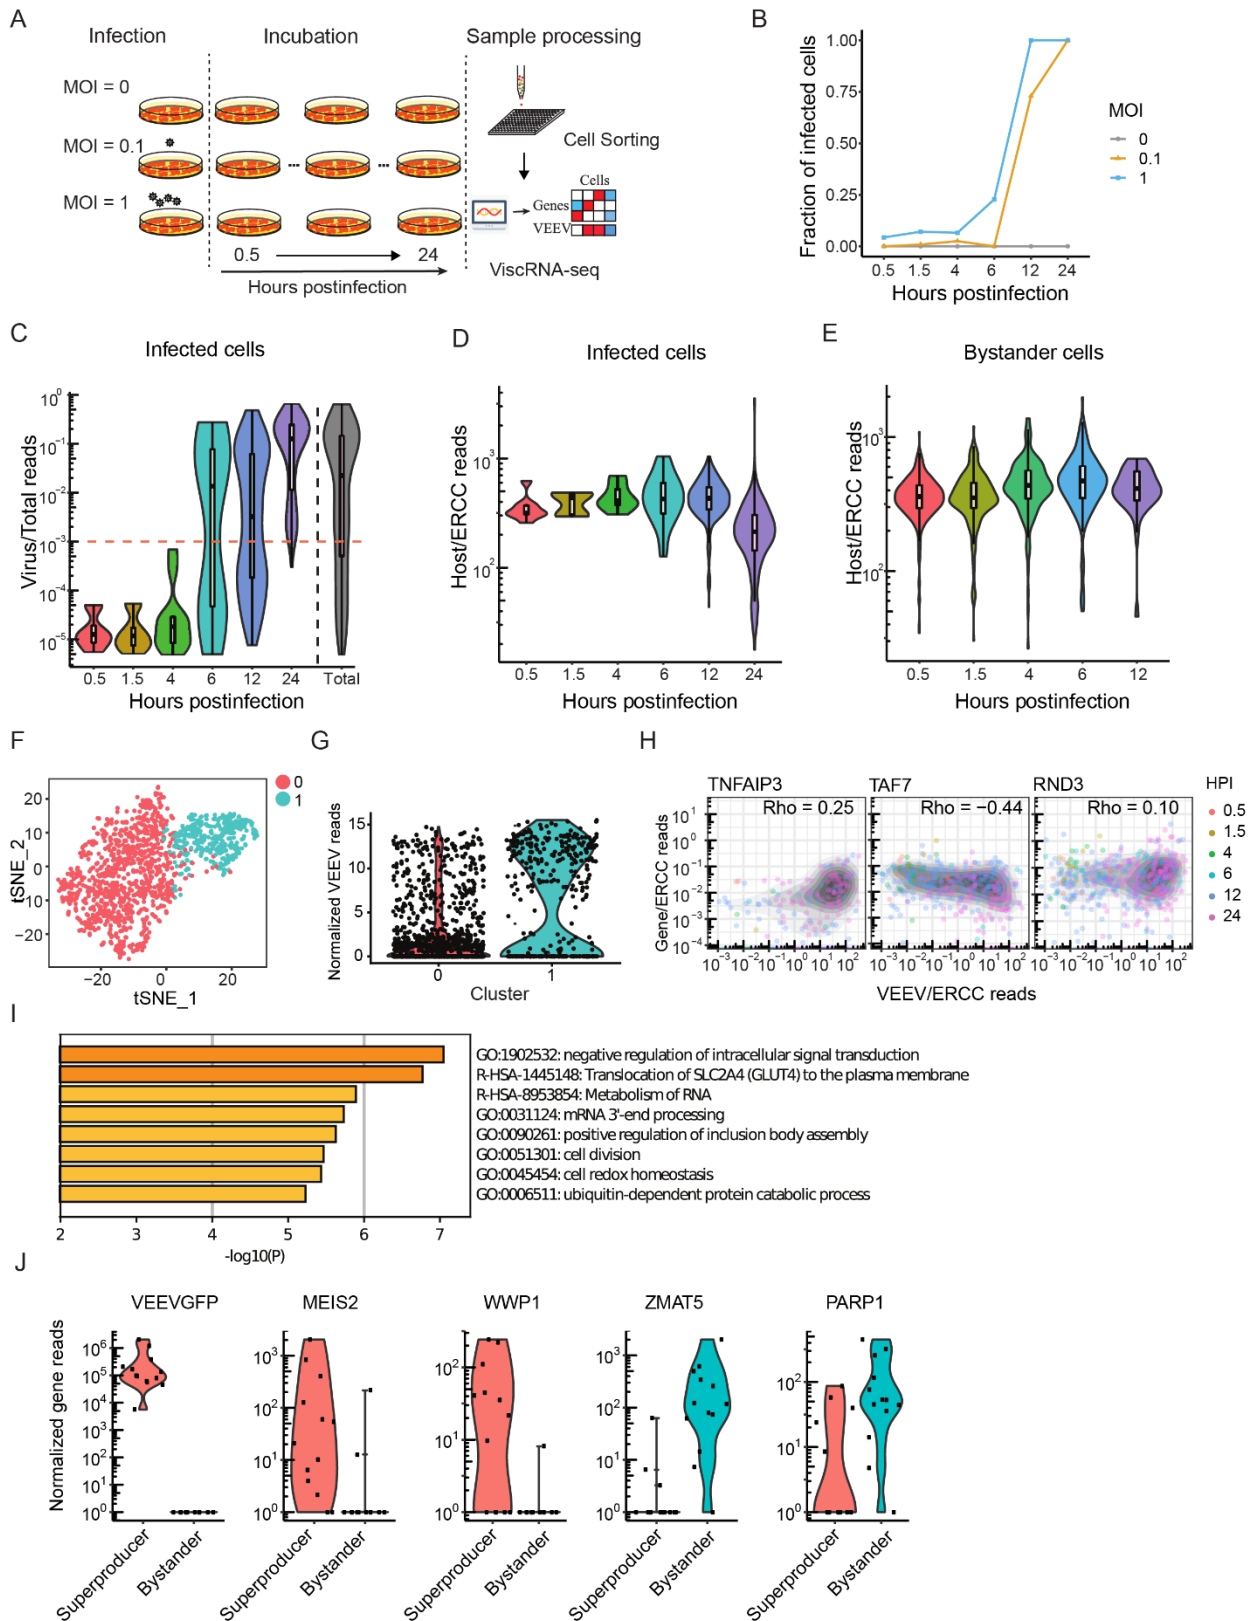

1015 **Figure 1. Cell-to-cell heterogeneity of VEEV and host gene expression.**

1016 (A) Schematic of the experimental setup. (B) The fraction of VEEV-TC-83-infected U-87 MG  
1017 cells over time for two MOIs. (C) Violin plots depicting the ratio of virus to total cDNA reads over  
1018 time. Total (on the right) represents the distribution of cells from all time points. The horizontal  
1019 dotted line represents the threshold dividing cells to “low vRNA” and “high vRNA” harboring  
1020 cells. (D-E) Violin plots showing host cDNA to ERCC reads in infected (D) and bystander (E)  
1021 cells derived from the same samples. (F) t-SNE plot of cells from infected cultures (MOIs 0.1  
1022 and 1) on the combined host gene expression data independently of vRNA abundance. Each  
1023 color refers to a Louvain cluster (0 and 1). (G) The distribution of vRNA abundance in the two  
1024 cell clusters defined in (F). (H) Representative scatter plots of host gene expression versus  
1025 vRNA abundance and corresponding Rho Spearman correlation coefficients. Each dot is a  
1026 single cell colored by the time postinfection, and the shaded contours indicate cell density  
1027 (greyscale, darker is higher). (I) Molecular function terms and P values derived from Gene  
1028 Ontology (GO) enrichment analysis of 206 genes that are both differentially expressed between  
1029 high vRNA and mock-infected cells and correlated with vRNA. (J) Violin plots of vRNA (VEEV-  
1030 GFP) abundance and expression of representative genes that are differentially expressed  
1031 between “superproducer” cells (n=13) and bystander cells (n=13) at 6 hpi with an MOI of 1. HPI,  
1032 hours postinfection; MOI, multiplicity of infection; ERCC, External RNA Controls Consortium.

1033

1034

1035



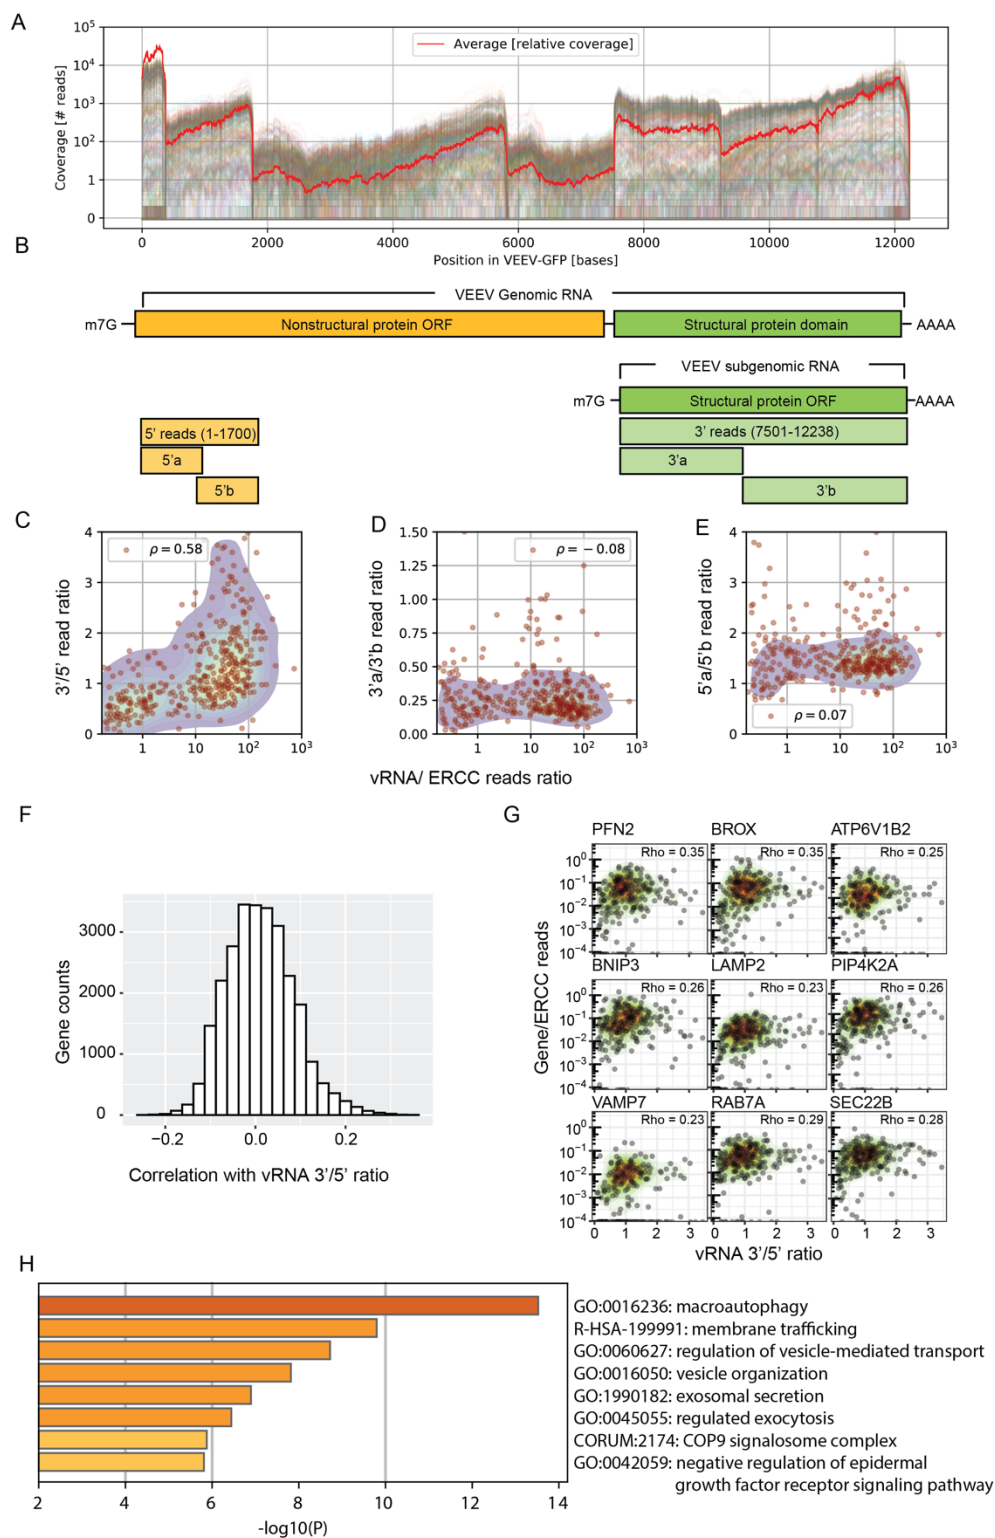



1037 **Figure 2. The expression of genes involved in intracellular membrane trafficking**  
1038 **correlates with the ratio of 3' to 5' vRNA reads.** (A) Coverage of viral reads over the entire  
1039 VEEV genome. Each line is a cell, and the red line is a scaled average across all cells. (B)  
1040 Genome architecture of VEEV highlighting the nonstructural (yellow) and structural (green)  
1041 protein domains. (C) Scatter plot showing positive correlation of VEEV 3'/5' read ratio with  
1042 cellular vRNA abundance. Each dot is an infected cell. (D-E) Scatter plots showing no  
1043 correlation between the 3'a/3'b read ratio (D) and 5'a/5'b read ratio (E) and cellular vRNA  
1044 abundance. (F) Histogram of Spearman correlation coefficients between all host genes and the  
1045 3'/5' read ratio. (G) Representative scatter plots of host gene expression versus vRNA 3'/5' read  
1046 ratio and corresponding Rho Spearman correlation coefficients. Each dot is a cell and contour  
1047 plots indicate cell density (low to high, green to red). (H) Gene enrichment analysis of top 300  
1048 genes positively correlated with the 3'/5' read ratio.

1049

1050

1051

1052

1053

1054

1055

1056

A

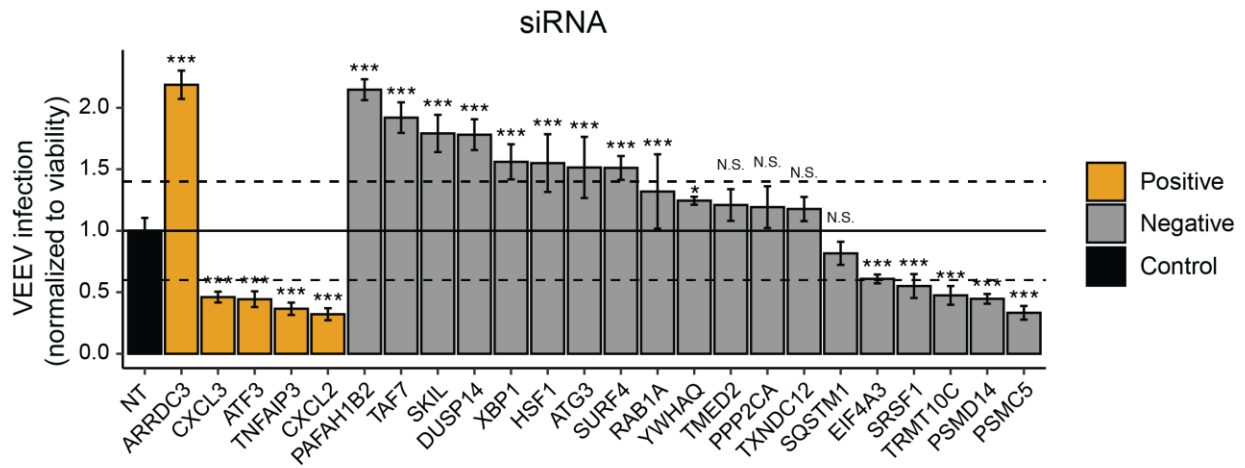

B

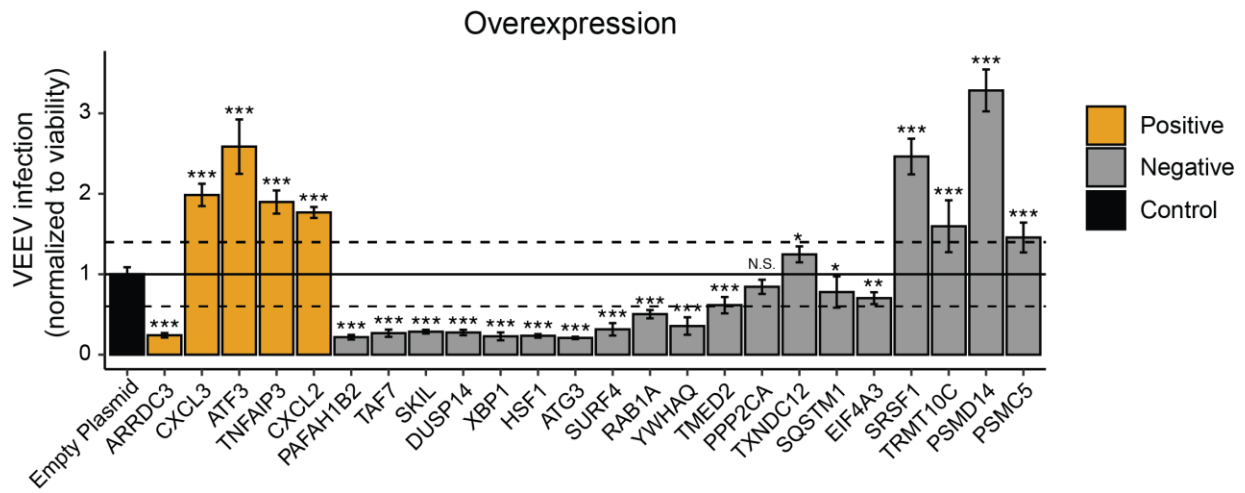

1057

1058 **Figure 3. Validation of candidate VEEV proviral and antiviral genes.** VEEV infection relative  
1059 to non-targeting (NT) siRNA (A) or empty plasmid (B) controls following siRNA-mediated  
1060 knockdown (A) or overexpression (B) of the indicated host factors measured by luminescence  
1061 assays at 18 hpi (MOI = 0.01) of U-87 MG cells with VEEV-TC-83-NLuc and normalized to cell  
1062 viability. Columns are color-coded based on the correlation of the respective gene with vRNA  
1063 abundance via viscRNA-Seq: yellow for genes that are positively correlated with vRNA and grey  
1064 for genes that are negatively correlated with vRNA. Both data sets are pooled from two  
1065 independent experiments with six replicates each. Shown are means  $\pm$  SD; \*p < 0.05, \*\*p <  
1066 0.01, \*\*\*p < 0.001 relative to the respective control by 1-way ANOVA followed by Dunnett's post  
1067 hoc test. The dotted lines represent the cutoffs for positivity. Cellular viability measurements are  
1068 shown in supplemental Figure S3.

1069

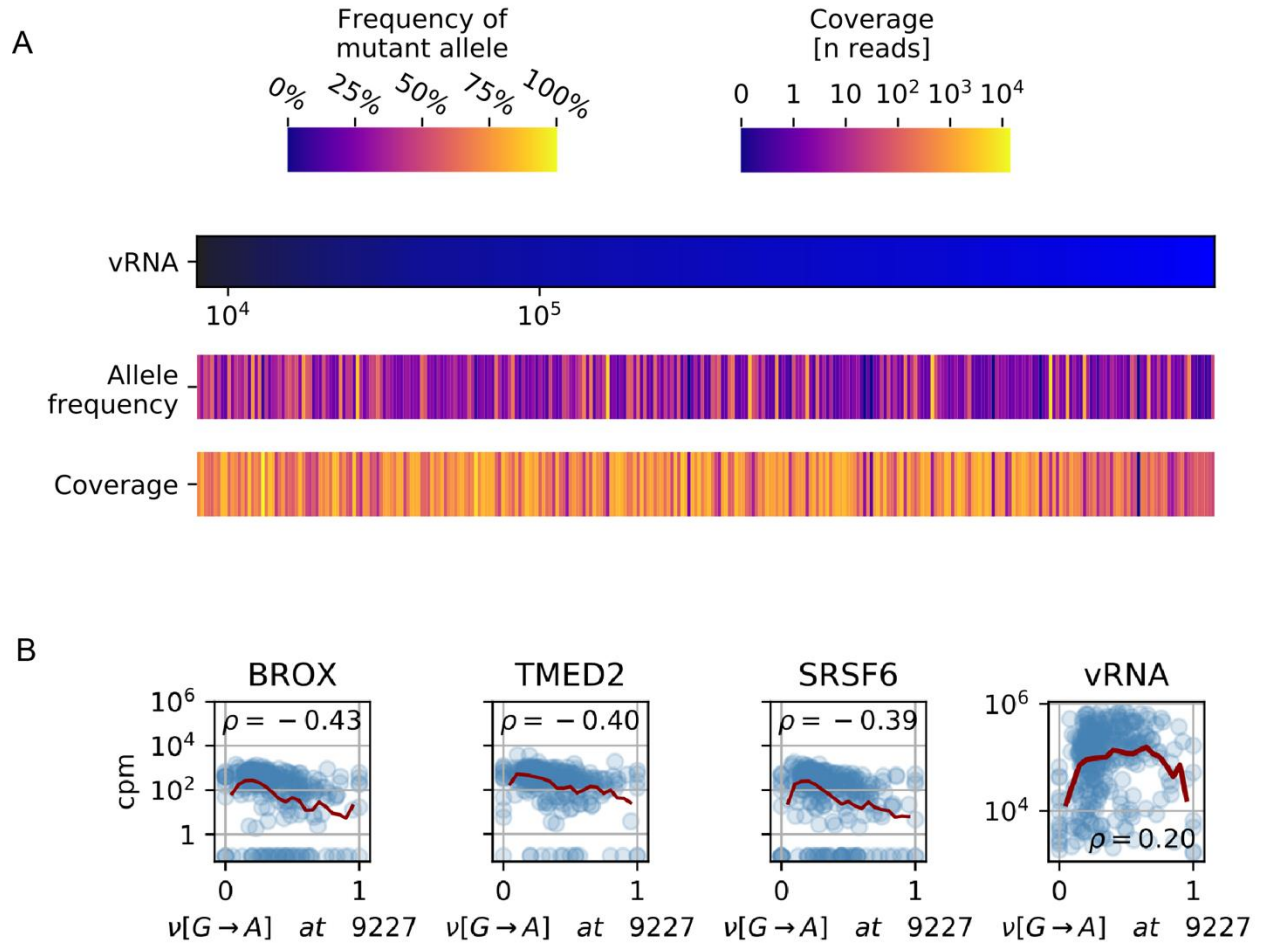



1080 **Figure 5. Comparative viscRNA-Seq analysis across five RNA viruses.** (A-C) Scatter plots  
1081 of representative gene expression versus vRNA in single cells during DENV (orange), ZIKV  
1082 (blue), and VEEV (green) infection. Dots indicate single cells, lines are running averages at  
1083 increasing vRNA abundances. (D) A ternary plot for the three genes shown in (A-C). Lines  
1084 indicate the percentage of host gene reads from each experiment at increasing vRNA  
1085 abundance, divided by the number of reads across all three experiments. Stars indicate the  
1086 cells with the highest vRNA abundance. Proximity to a corner of the triangle suggests that the  
1087 expression of the gene is much higher during late infection by the corresponding virus than the  
1088 other two. Colored triangles in the background indicate areas of upregulation specific to each  
1089 virus. (E, F) Correlation between expression and vRNA during DENV versus ZIKV infection of  
1090 the top genes that positively correlate with the VEEV 3'/5' read ratio (E) or a similar number of  
1091 random genes (F). Each dot is a gene and the axis coordinate is the percentage of genes with a  
1092 correlation with vRNA smaller than the the gene of interest. For (E), size of the dot increases  
1093 with the correlation with VEEV 3'/5' read ratio (top correlated gene is largest). (G) t-SNE  
1094 embedding of host genes correlation with vRNA during infection by 5 individual RNA viruses.  
1095 Blue and red indicate downregulation and upregulation during infection, respectively. Several  
1096 clusters of genes are observed (0-8). (H) Hierarchical clustering of host gene clusters highlights  
1097 that upregulation is more virus-specific and is consistent with the known phylogeny. (I) Gene set  
1098 enrichment analysis of cluster 3, which contains commonly downregulated genes. cpm, count  
1099 per million; WNV, West Nile virus; IAV, influenza A virus.

1100

1101

1102

1103

1104

1105 **Supplementary materials**

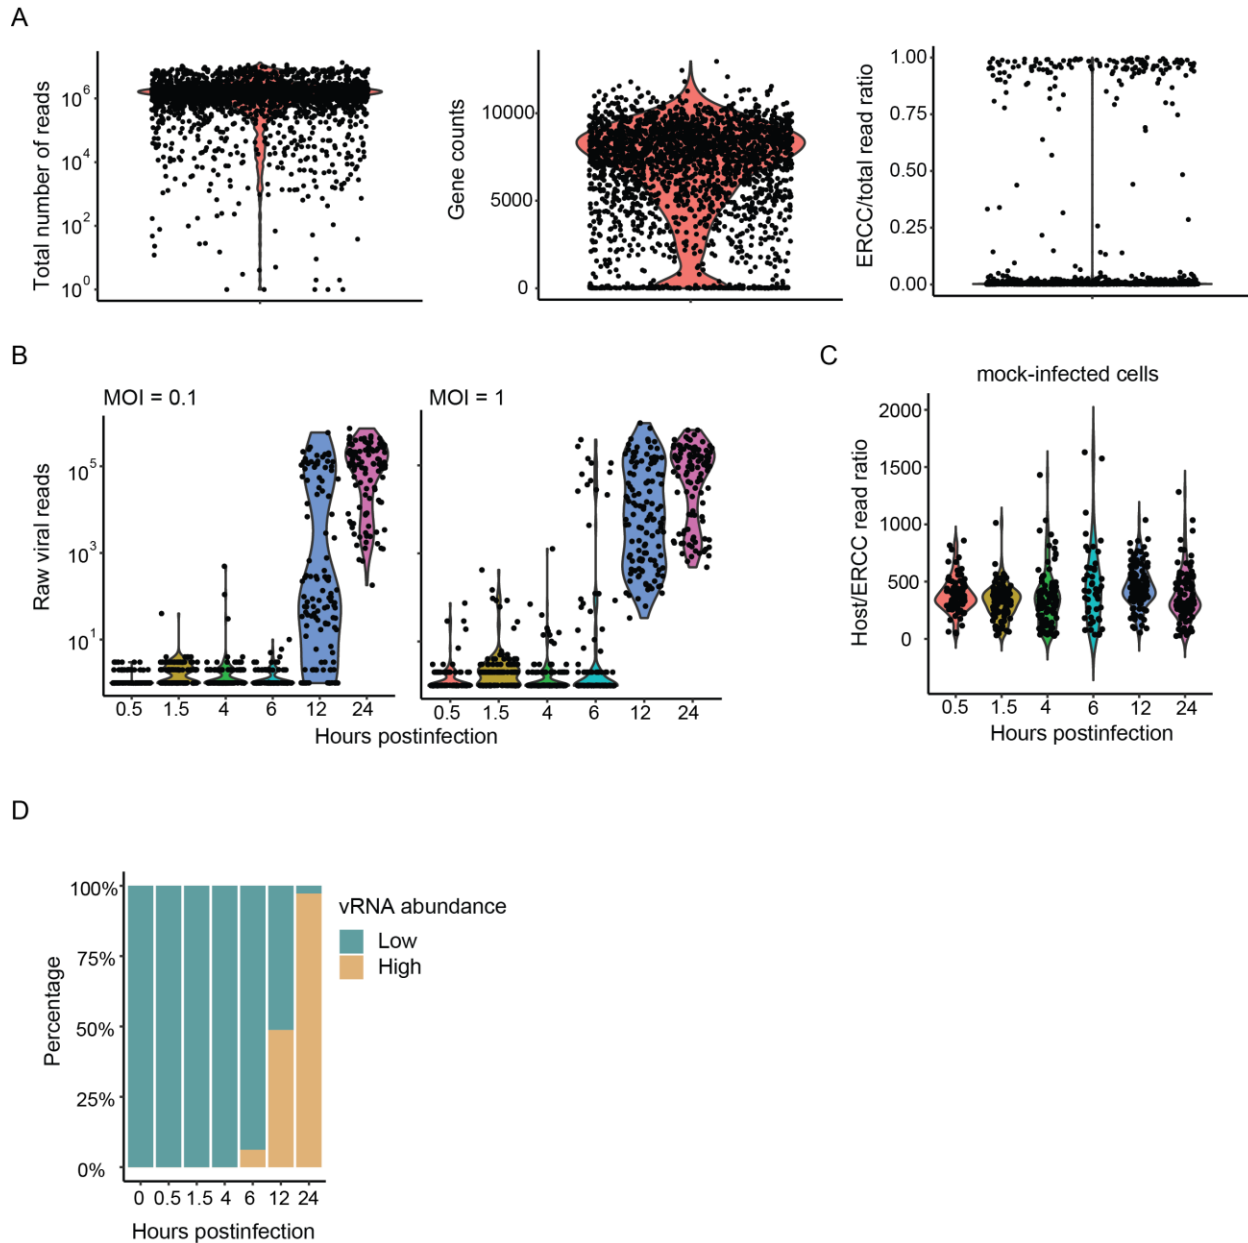

1106

1107

1108 **Figure S1. Quality control, normalization and viral load distribution of the sample. (A)**

1109 Quality control of the VEEV dataset. Shown are the total number of reads (left panel), gene

1110 counts (middle panel) and ratio of ERCC spike-in RNA reads to total reads (right panel). Cell

1111 selection criteria included: total reads > 300,000, gene counts > 500 and a ratio of ERCC spike-

1112 in RNA to total reads < 0.05. (B) Raw viral reads over time in cells infected with MOI of 0.1 (left

1113 panel) and 1 (right panel). (C) Host to ERCC read ratio over time in mock-infected cells.



1114 Individual dots in panels A, B, and C represent single cells. (D) Percentage of low and high  
1115 vRNA-harboring cells at each time point. MOI, multiplicity of infection; ERCC, External RNA  
1116 Controls Consortium.

1117

1118

1119

1120

1121

1122

1123

1124

1125

1126

1127

1128

1129

1130

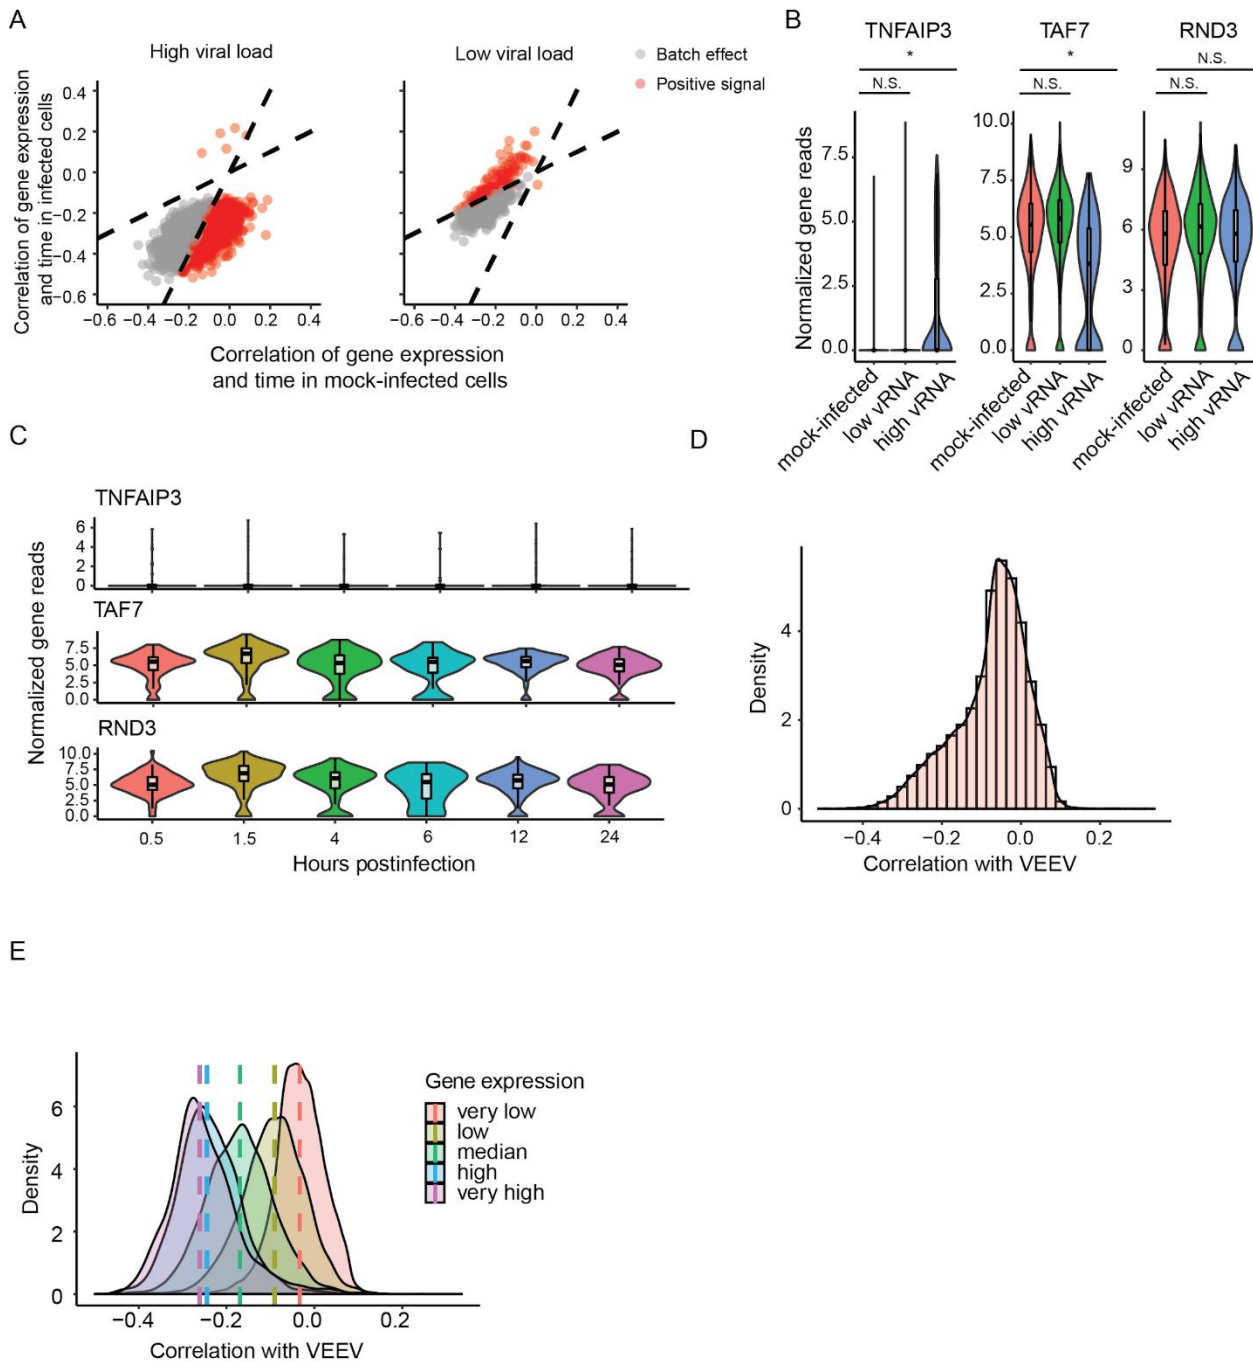

1131  
 1132 **Figure S2. Batch effect removal, representative differentially expressed genes (DGEs)**  
 1133 **and correlation analysis.** (A) Two-dimensional scatter plots showing correlations between  
 1134 gene expression and time postinfection in VEEV-infected (left: high vRNA abundance, right: low  
 1135 vRNA abundance) and mock-infected cells. The dotted lines represent cut-off edge of 2-fold  
 1136 differences. Each dot represents a gene. Orange, genes demonstrating greater than 2-fold

1137 difference between infected and mock-infected cells and thus considered DEGs; grey, genes  
1138 whose expression is similarly altered over time between infected and mock-infected cells and  
1139 thus likely represent batch effect. (B) Representative genes with distinct expression patterns  
1140 among different cell groups. N.S., not significant. (C) The expression of genes shown in (B)  
1141 does not significantly change over time in mock-infected cells. (D) Distribution of Spearman  
1142 correlation coefficients between VEEV vRNA abundance and ~55,000 host genes. (E)  
1143 Distributions of Spearman correlation coefficients shown in D stratified by the average  
1144 expression level of the gene in mock-infected cells.

1145

1146

1147

1148

1149

1150

1151

1152

1153

1154

1155

1156

1157

1158

1159

1160

1161

1162

1163

A

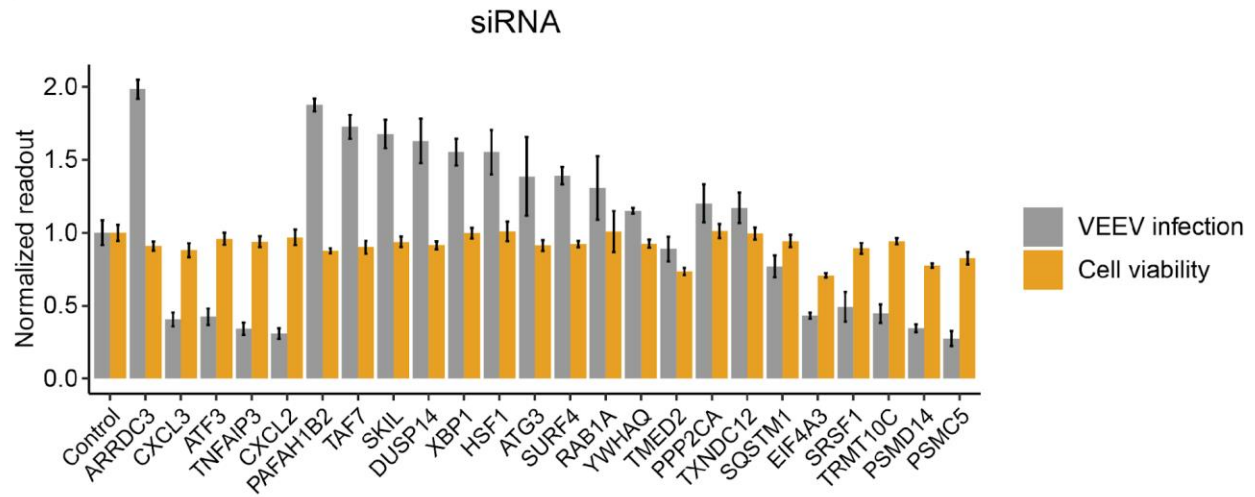

B

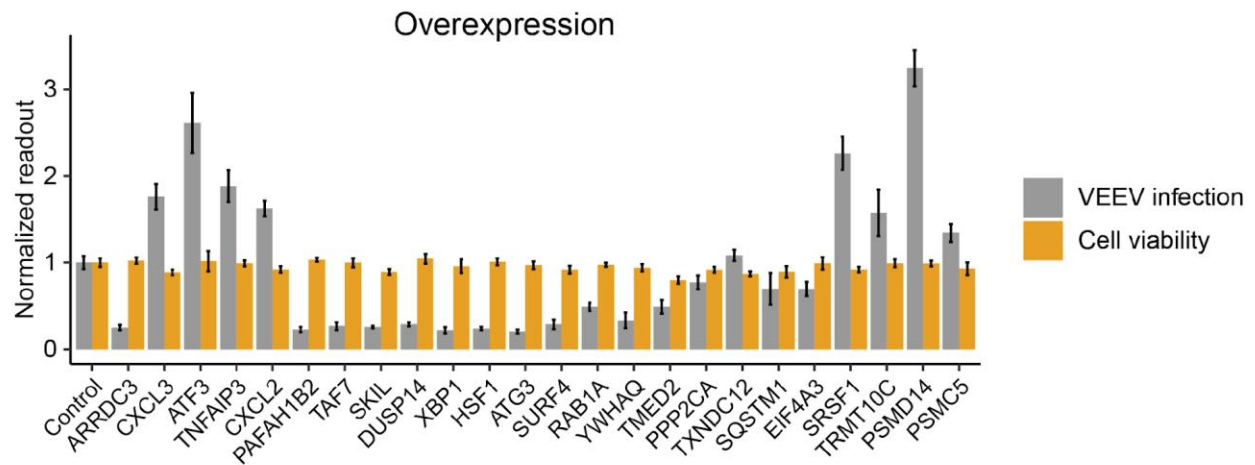

C

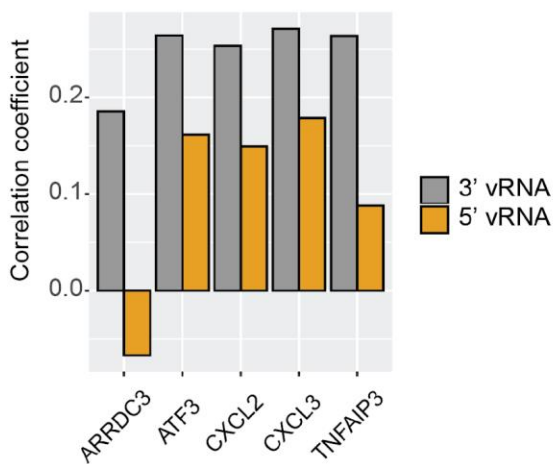

1164

1165 **Figure S3. Validation of proviral and antiviral factors.** siRNA (A) and ectopic expression  
1166 screens (B) testing the involvement of the indicated host factors in VEEV infection. Overall  
1167 VEEV infection (grey) measured by luminescence assays and cell viability (orange) measured  
1168 by alamarBlue assays in U-87 MG cells transfected with the indicated siRNAs or ectopically  
1169 expressing the indicated cellular factors at 18 hpi with VEEV-TC-83-NLuc (MOI = 0.01). Data  
1170 are expressed relative to NT siRNA or empty plasmid control. Both data sets are pooled from  
1171 two independent experiments with six replicates each. Shown are means  $\pm$  SD. (C) Correlation  
1172 coefficients between proviral candidates with the 3' (grey) and 5' (orange) vRNA reads.

1173

1174

1175

1176

1177

1178

1179

1180

1181

1182

1183

1184

1185

1186

1187

1188

1189

1190

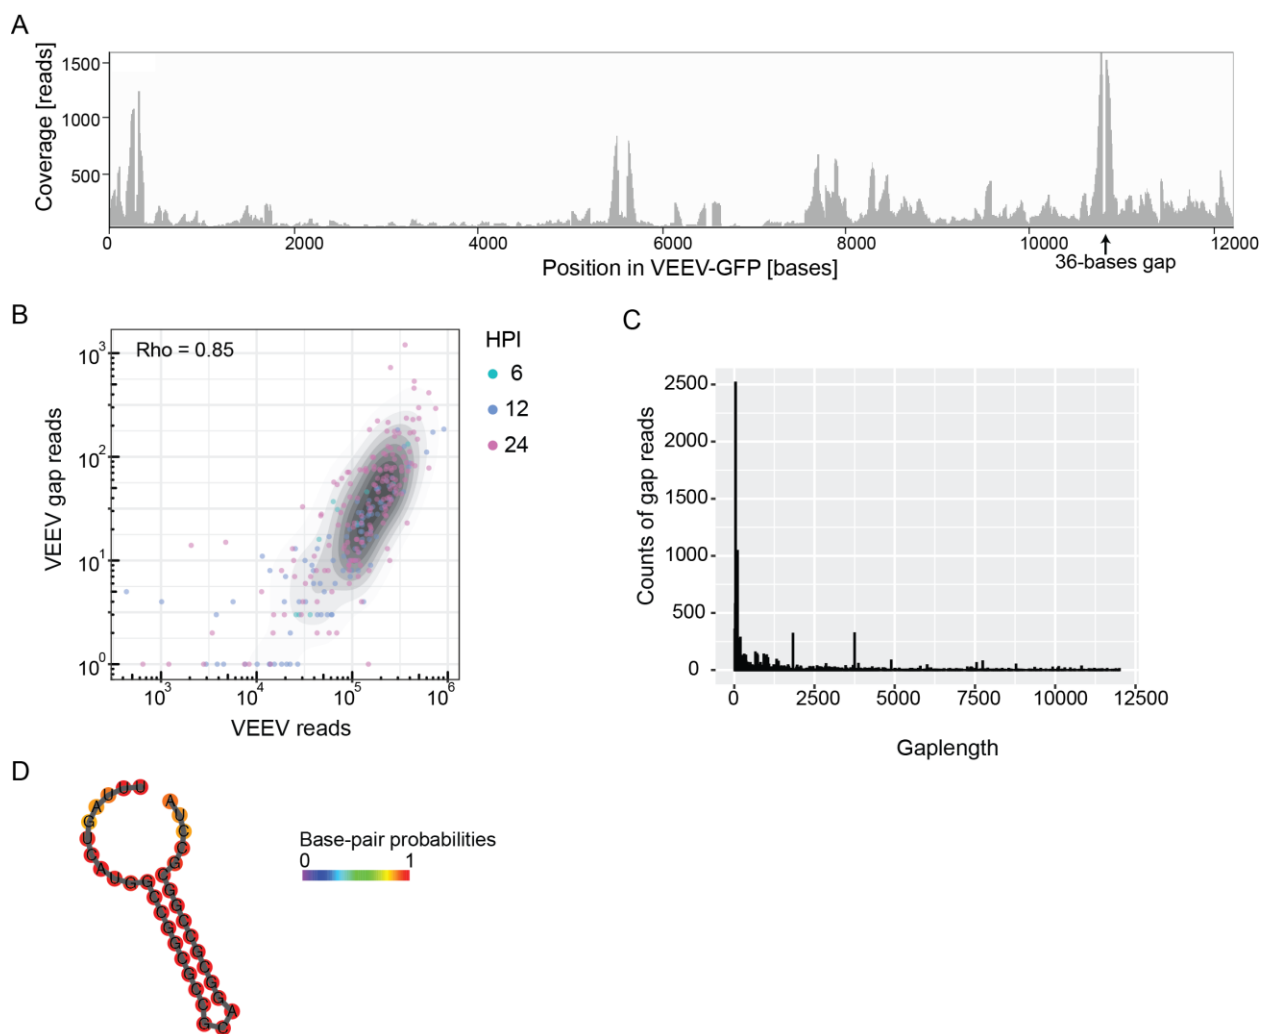

1191

1192

1193

1194 **Figure S4. VEEV gap reads identified via viscrRNA-Seq.** (A) Coverage of VEEV gap reads

1195 over the VEEV-TC-83-GFP genome. (B) Scatter plot of number of VEEV gap reads and VEEV

1196 total reads within cells with detected gap reads. Each dot represents a cell and colored by hpi.

1197 (C) Histogram of gap lengths indicating that the majority of gaps are shorter than 1000

1198 nucleotides. (D) RNA structural prediction of the most common 36-base gap (arrow in A) via

1199 RNAfold web server. Scale bar indicates the possibilities of base pairing.

1200

1201

1202

A

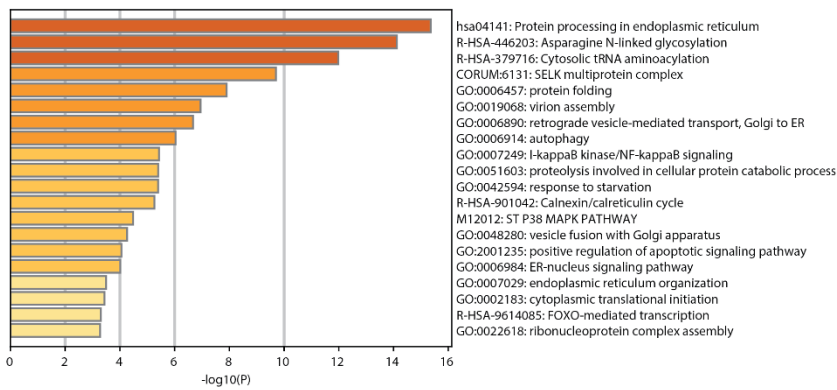

B

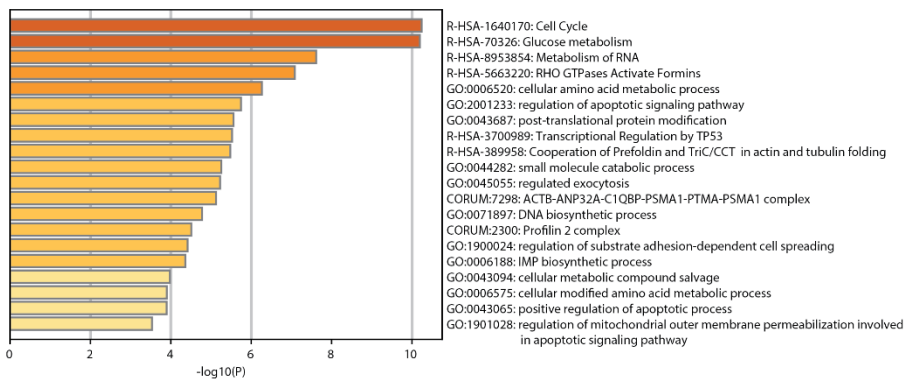

1203

1204 **Figure S5. Pathway analysis for genes that positively correlated with VEEV 3'/5' read**

1205 **ratio and positively (A) or negatively (B) correlated with DENV and ZIKV. Each bar**

1206 **represents a group of genes according to Gene Ontology, KEGG, or other databases of**

1207 **biological function. The plot was made using metascape (Zhou et al. 2019).**

1208

1209

1210

1211



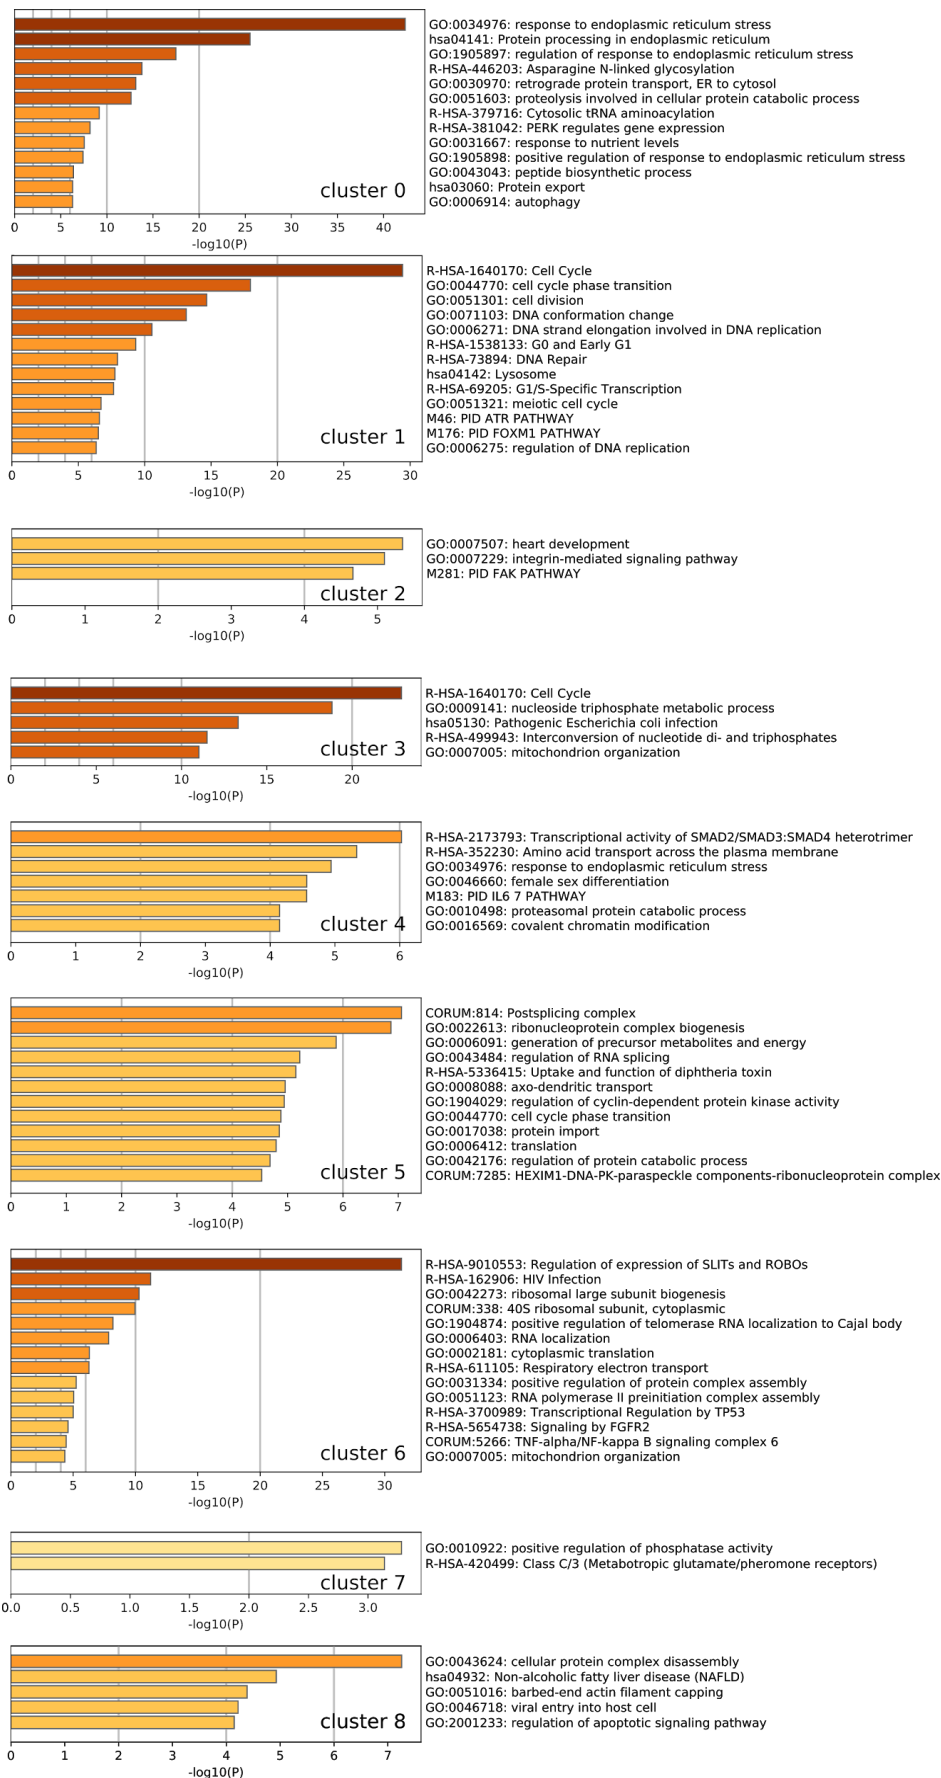

1213 **Figure S6. Pathway analysis for all gene clusters in Figures 5G and H.** Each bar represents  
1214 a group of genes according to Gene Ontology, KEGG, or other databases of biological function.  
1215 The plot was made using metascape (Zhou et al. 2019). In cluster 6, the most enriched pathway  
1216 (Regulation of expression of SLITs and ROBOs) is related to the astrocyte nature of U87 cells  
1217 used for VEEV infection, as this cell lines express these genes at higher levels than Huh7 cells  
1218 used for flavivirus infection (around 6 times higher) as well as the cells used for influenza virus  
1219 infection (around 100 times higher).

1220

1221

1222

1223

| Pool Catalog Number | Duplex Catalog Number | Gene Symbol                         | GENE ID | Gene Accession   | GI Number | Sequence                      |
|---------------------|-----------------------|-------------------------------------|---------|------------------|-----------|-------------------------------|
| L-007878-00         | J-007878-08           | CXCL3                               |         | 2921 NM_002090   | 54144649  | CCAACUGACAGGAGAGAAG           |
| L-007878-00         | J-007878-09           | CXCL3                               |         | 2921 NM_002090   | 54144649  | UCCAAAGUGGUAUUGUA             |
| L-007878-00         | J-007878-10           | CXCL3                               |         | 2921 NM_002090   | 54144649  | GGGAGACCAUAUUGUJCA            |
| L-007878-00         | J-007878-11           | CXCL3                               |         | 2921 NM_002090   | 54144649  | UACGAGGUGUUCUUAUU             |
| L-007877-02         | J-007877-07           | CXCL2                               |         | 2920 NM_002089   | 148298657 | CAGCAUCGCCAUGGUUAA            |
| L-007877-02         | J-007877-08           | CXCL2                               |         | 2920 NM_002089   | 148298657 | GAGCAGAGGUGUUCGUAU            |
| L-007877-02         | J-007877-09           | CXCL2                               |         | 2920 NM_002089   | 148298657 | GAUAGAAGGUUJGAGAU             |
| L-007877-02         | J-007877-21           | CXCL2                               |         | 2920 NM_002089   | 148298657 | CAUJUGACGGCAGGGAAA            |
| L-009919-00         | J-009919-05           | TNFAIP3                             |         | 7128 NM_006290   | 26051241  | UJGCGAUUCUUGUJCAAA            |
| L-009919-00         | J-009919-06           | TNFAIP3                             |         | 7128 NM_006290   | 26051241  | CAACUCUCUUAUUAUUA             |
| L-009919-00         | J-009919-07           | TNFAIP3                             |         | 7128 NM_006290   | 26051241  | UCUGUAGAUUAUUAUUA             |
| L-009919-00         | J-009919-08           | TNFAIP3                             |         | 7128 NM_006290   | 26051241  | CAACGAUUCUUAUUAUUA            |
| L-008663-00         | J-008663-05           | ATF3                                |         | 467 NM_001030287 | 71902535  | GAGCUAAGCAGUCUGGUA            |
| L-008663-00         | J-008663-06           | ATF3                                |         | 467 NM_001030287 | 71902535  | GCAGAAUGCCGAAACAAG            |
| L-008663-00         | J-008663-07           | ATF3                                |         | 467 NM_001030287 | 71902535  | AGAAAGCAGUUAUUAUUA            |
| L-008663-00         | J-008663-08           | ATF3                                |         | 467 NM_001030287 | 71902535  | CGAGAAAGAAUUAAGAUUG           |
| L-014063-01         | J-014063-09           | ARRDC3                              |         | 57561 NM_020801  | 32698735  | GAACGUUUGCUGCGAUAAA           |
| L-014063-01         | J-014063-10           | ARRDC3                              |         | 57561 NM_020801  | 32698735  | UGCAAGAGGACAUUCGAAA           |
| L-014063-01         | J-014063-11           | ARRDC3                              |         | 57561 NM_020801  | 32698735  | GUUAUUAUCCCGUGGAAUA           |
| L-014063-01         | J-014063-12           | ARRDC3                              |         | 57561 NM_020801  | 32698735  | AGUCAGUUGAGCAUGAAUA           |
| L-012329-00         | J-012329-05           | YWHAQ                               |         | 10971 NM_006826  | 21464103  | CAACUUAUCCAGAGAGUA            |
| L-012329-00         | J-012329-06           | YWHAQ                               |         | 10971 NM_006826  | 21464103  | CCAAGAGGCAUUAUUAUA            |
| L-012329-00         | J-012329-07           | YWHAQ                               |         | 10971 NM_006826  | 21464103  | GCUCUUAACUUAUUCUGUAU          |
| L-012329-00         | J-012329-08           | YWHAQ                               |         | 10971 NM_006826  | 21464103  | GCUGAAACUUAUUAUUAUA           |
| L-008074-01         | J-008074-09           | TMED2                               |         | 10959 NM_006815  | 21314646  | CAGUUAUGAAUCUUGACGCU          |
| L-008074-01         | J-008074-10           | TMED2                               |         | 10959 NM_006815  | 21314646  | UGACAUUUGGACAGACUA            |
| L-008074-01         | J-008074-11           | TMED2                               |         | 10959 NM_006815  | 21314646  | CGUGGAGUUAUUAUUAUA            |
| L-008074-01         | J-008074-12           | TMED2                               |         | 10959 NM_006815  | 21314646  | GCACAAGCCUGAUUAUUA            |
| L-008797-00         | J-008797-05           | PAFAH1B2                            |         | 5049 NM_002572   | 4505584   | GCACGACAGUUAUUAUUA            |
| L-008797-00         | J-008797-06           | PAFAH1B2                            |         | 5049 NM_002572   | 4505584   | GGUCUUAUUAUUAUUAUUA           |
| L-008797-00         | J-008797-07           | PAFAH1B2                            |         | 5049 NM_002572   | 4505584   | GGAAACACCUUGAGGAGAA           |
| L-008797-00         | J-008797-08           | PAFAH1B2                            |         | 5049 NM_002572   | 4505584   | GGAGUAGCCGAUGGAGUJ            |
| L-010622-01         | J-010622-09           | SURF4                               |         | 8836 NM_033161   | 19593984  | CCACAAGGGUAGUGCAACA           |
| L-010622-01         | J-010622-10           | SURF4                               |         | 8836 NM_033161   | 19593984  | CGAAUUAUUGUAAGUACGA           |
| L-010622-01         | J-010622-11           | SURF4                               |         | 8836 NM_033161   | 19593984  | GCUCUUAUUAUUAUUAUUA           |
| L-010622-01         | J-010622-12           | SURF4                               |         | 8836 NM_033161   | 19593984  | ACGUUAUUAUUAUUAUUAUUA         |
| L-008283-00         | J-008283-06           | RAB1A                               |         | 5861 NM_004161   | 41350195  | CAGCAUUAUUAUUAUUAUUA          |
| L-008283-00         | J-008283-07           | RAB1A                               |         | 5861 NM_004161   | 41350195  | GUAGAACAGUUAUUAUUA            |
| L-008283-00         | J-008283-08           | RAB1A                               |         | 5861 NM_004161   | 41350195  | GGAAACAGUUAUUAUUAUUA          |
| L-008283-00         | J-008283-09           | RAB1A                               |         | 5861 NM_004161   | 41350195  | UGAGAAUGCCAAUUAUUAUUA         |
| L-003598-01         | J-003598-09           | PPP2CA                              |         | 5515 NM_002715   | 57222566  | CCGGAAUGUUAUUAUUAUUA          |
| L-003598-01         | J-003598-10           | PPP2CA                              |         | 5515 NM_002715   | 57222566  | ACAUUAACACCCUCUGGAAU          |
| L-003598-01         | J-003598-11           | PPP2CA                              |         | 5515 NM_002715   | 57222566  | UCAUUGAAACUUAUUAUUAUUA        |
| L-003598-01         | J-003598-12           | PPP2CA                              |         | 5515 NM_002715   | 57222566  | CAGUAGAGCUUAUUAUUAUUA         |
| L-010535-00         | J-010535-05           | SKIL                                |         | 6498 NM_005414   | 40254817  | GAUUAACAGUUAUUAUUAUUA         |
| L-010535-00         | J-010535-06           | SKIL                                |         | 6498 NM_005414   | 40254817  | GCAAGUUAUUAUUAUUAUUA          |
| L-010535-00         | J-010535-07           | SKIL                                |         | 6498 NM_005414   | 40254817  | GGGCAUUAUUAUUAUUAUUA          |
| L-010535-00         | J-010535-08           | SKIL                                |         | 6498 NM_005414   | 40254817  | GGAAUUAUUAUUAUUAUUAUUA        |
| L-009913-00         | J-009913-05           | TXNDC12                             |         | 51060 NM_015913  | 23943808  | UAUUGUUAUUAUUAUUAUUA          |
| L-009913-00         | J-009913-06           | TXNDC12                             |         | 51060 NM_015913  | 23943808  | GAUCAUUAUUAUUAUUAUUA          |
| L-009913-00         | J-009913-07           | TXNDC12                             |         | 51060 NM_015913  | 23943808  | UCAGAAACUUAUUAUUAUUAUUA       |
| L-009913-00         | J-009913-08           | TXNDC12                             |         | 51060 NM_015913  | 23943808  | GCUCUUAUUAUUAUUAUUAUUA        |
| L-018672-01         | J-018672-09           | SRSF1                               |         | 6426 NM_006924   | 31543618  | CGUGGAGUUAUUAUUAUUAUUA        |
| L-018672-01         | J-018672-10           | SRSF1                               |         | 6426 NM_006924   | 31543618  | UGACCUUAUUAUUAUUAUUAUUA       |
| L-018672-01         | J-018672-11           | SRSF1                               |         | 6426 NM_006924   | 31543618  | UCUCGAAAGCCGUAGUCGUA          |
| L-018672-01         | J-018672-12           | SRSF1                               |         | 6426 NM_006924   | 31543618  | CAGGAUUAUUAUUAUUAUUAUUA       |
| L-020813-01         | J-020813-09           | TRMT10C                             |         | 54931 NM_017819  | 8923404   | GAGAUUAUUAUUAUUAUUAUUA        |
| L-020813-01         | J-020813-10           | TRMT10C                             |         | 54931 NM_017819  | 8923404   | UUGCAUUAUUAUUAUUAUUAUUA       |
| L-020813-01         | J-020813-11           | TRMT10C                             |         | 54931 NM_017819  | 8923404   | GAGUUAUUAUUAUUAUUAUUAUUA      |
| L-020813-01         | J-020813-12           | TRMT10C                             |         | 54931 NM_017819  | 8923404   | GGGAUUAUUAUUAUUAUUAUUAUUA     |
| L-010230-00         | J-010230-05           | SQSTM1                              |         | 8878 NM_003900   | 46251280  | GAACAGUUAUUAUUAUUAUUAUUA      |
| L-010230-00         | J-010230-06           | SQSTM1                              |         | 8878 NM_003900   | 46251280  | GCAGUUAUUAUUAUUAUUAUUAUUA     |
| L-010230-00         | J-010230-07           | SQSTM1                              |         | 8878 NM_003900   | 46251280  | CCACAGGGCUGAAGGAAGC           |
| L-010230-00         | J-010230-08           | SQSTM1                              |         | 8878 NM_003900   | 46251280  | GGAAACUUAUUAUUAUUAUUAUUA      |
| L-009484-00         | J-009484-05           | PSMC5                               |         | 5705 NM_002805   | 24497434  | CCAAAGAACUUAUUAUUAUUAUUA      |
| L-009484-00         | J-009484-06           | PSMC5                               |         | 5705 NM_002805   | 24497434  | CAUACGGACUUAUUAUUAUUAUUA      |
| L-009484-00         | J-009484-07           | PSMC5                               |         | 5705 NM_002805   | 24497434  | CAAGGUAAGCCAUUAUUAUUAUUA      |
| L-009484-00         | J-009484-08           | PSMC5                               |         | 5705 NM_002805   | 24497434  | GGAAACUUAUUAUUAUUAUUAUUA      |
| L-020762-00         | J-020762-05           | E1F4A3                              |         | 9775 NM_014740   | 41327777  | UGCAUUAUUAUUAUUAUUAUUAUUA     |
| L-020762-00         | J-020762-06           | E1F4A3                              |         | 9775 NM_014740   | 41327777  | GGUUAUUAUUAUUAUUAUUAUUAUUA    |
| L-020762-00         | J-020762-07           | E1F4A3                              |         | 9775 NM_014740   | 41327777  | GAUGAACUUAUUAUUAUUAUUAUUA     |
| L-020762-00         | J-020762-08           | E1F4A3                              |         | 9775 NM_014740   | 41327777  | GAUUAUUAUUAUUAUUAUUAUUAUUA    |
| L-009552-00         | J-009552-07           | XBP1                                |         | 7494 NM_005080   | 14110394  | GAACAUUAUUAUUAUUAUUAUUAUUA    |
| L-009552-00         | J-009552-08           | XBP1                                |         | 7494 NM_005080   | 14110394  | ACAGCAAGUGGUAUUAUUAUUAUUA     |
| L-009552-00         | J-009552-09           | XBP1                                |         | 7494 NM_005080   | 14110394  | CGAAAGAACGUCUUAUUAUUAUUAUUA   |
| L-009552-00         | J-009552-10           | XBP1                                |         | 7494 NM_005080   | 14110394  | GGUUAUUAUUAUUAUUAUUAUUAUUA    |
| L-013669-00         | J-013669-05           | TAF7                                |         | 6879 NM_005642   | 14717406  | GAGAAGGCGGUAUUAUUAUUAUUA      |
| L-013669-00         | J-013669-06           | TAF7                                |         | 6879 NM_005642   | 14717406  | GGACAAGCUUAUUAUUAUUAUUAUUA    |
| L-013669-00         | J-013669-07           | TAF7                                |         | 6879 NM_005642   | 14717406  | AUACACUUAUUAUUAUUAUUAUUAUUA   |
| L-013669-00         | J-013669-08           | TAF7                                |         | 6879 NM_005642   | 14717406  | UAUUAUUAUUAUUAUUAUUAUUAUUA    |
| L-012109-02         | J-012109-05           | HSF1                                |         | 3297 NM_005526   | 132626772 | CACAUUAUUAUUAUUAUUAUUAUUA     |
| L-012109-02         | J-012109-06           | HSF1                                |         | 3297 NM_005526   | 132626772 | CCACUUAUUAUUAUUAUUAUUAUUA     |
| L-012109-02         | J-012109-07           | HSF1                                |         | 3297 NM_005526   | 132626772 | CCUGAAGGUAUUAUUAUUAUUAUUA     |
| L-012109-02         | J-012109-08           | HSF1                                |         | 3297 NM_005526   | 132626772 | GACACAGCCCGGUAUUAUUAUUAUUA    |
| L-015375-00         | J-015375-05           | ATG3                                |         | 64422 NM_022488  | 34147490  | GAGAGUGGUAUUAUUAUUAUUAUUA     |
| L-015375-00         | J-015375-06           | ATG3                                |         | 64422 NM_022488  | 34147490  | CAGGAAUGGUAUUAUUAUUAUUAUUA    |
| L-015375-00         | J-015375-07           | ATG3                                |         | 64422 NM_022488  | 34147490  | GAGCAACGGCAGCCUUAUUAUUA       |
| L-015375-00         | J-015375-08           | ATG3                                |         | 64422 NM_022488  | 34147490  | CAAGACACUUAUUAUUAUUAUUAUUA    |
| L-006024-00         | J-006024-05           | PSMD14                              |         | 10213 NM_005805  | 42734423  | GAACAAGUCUUAUUAUUAUUAUUAUUA   |
| L-006024-00         | J-006024-06           | PSMD14                              |         | 10213 NM_005805  | 42734423  | GGCAUUAUUAUUAUUAUUAUUAUUA     |
| L-006024-00         | J-006024-07           | PSMD14                              |         | 10213 NM_005805  | 42734423  | AGAGUUAUUAUUAUUAUUAUUAUUA     |
| L-006024-00         | J-006024-08           | PSMD14                              |         | 10213 NM_005805  | 42734423  | GAUGUUAUUAUUAUUAUUAUUAUUAUUA  |
| L-007888-00         | J-007888-09           | DUSP14                              |         | 11072 NM_007026  | 5902001   | CCAUUAUUAUUAUUAUUAUUAUUAUUA   |
| L-007888-00         | J-007888-10           | DUSP14                              |         | 11072 NM_007026  | 5902001   | UUUGGAAUGCCAGUUAUUAUUAUUA     |
| L-007888-00         | J-007888-11           | DUSP14                              |         | 11072 NM_007026  | 5902001   | GGCAUUAUUAUUAUUAUUAUUAUUAUUA  |
| L-007888-00         | J-007888-12           | DUSP14                              |         | 11072 NM_007026  | 5902001   | CCCGACACCUUAUUAUUAUUAUUAUUA   |
| D-001810-10         | D-001810-01           | ON-TARGETplus Non-targeting Control |         | 0                |           | UGGUUUUAUUAUUAUUAUUAUUAUUAUUA |
| D-001810-10         | D-001810-02           | ON-TARGETplus Non-targeting Control |         | 0                |           | UGGUUUUAUUAUUAUUAUUAUUAUUAUUA |
| D-001810-10         | D-001810-03           | ON-TARGETplus Non-targeting Control |         | 0                |           | UGGUUUUAUUAUUAUUAUUAUUAUUAUUA |
| D-001810-10         | D-001810-04           | ON-TARGETplus Non-targeting Control |         | 0                |           | UGGUUUUAUUAUUAUUAUUAUUAUUAUUA |
